# Supplementary material for: The Antioxidant Drug Edaravone Binds to the Aryl Hydrocarbon Receptor (AHR) and Promotes the Downstream Signaling Pathway Activation
Source: MDPI journal article supplement (doi:10.3390/biom14040443), 2024-04-04
Supplement: s1 [file s1]

Ahr

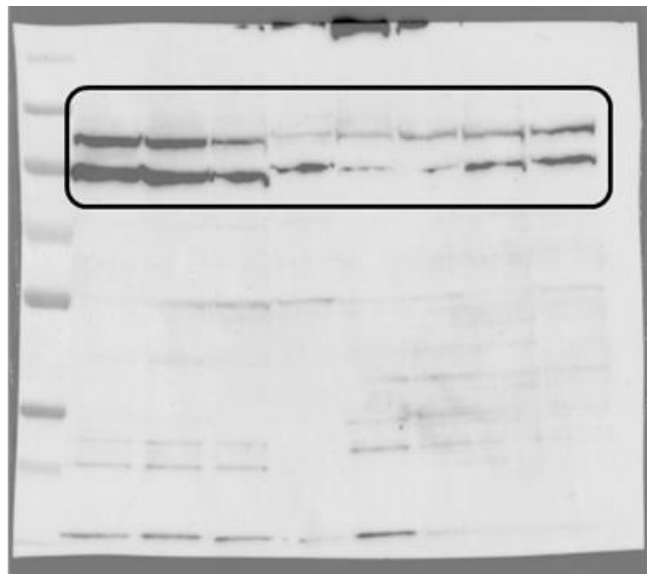

Gapdh

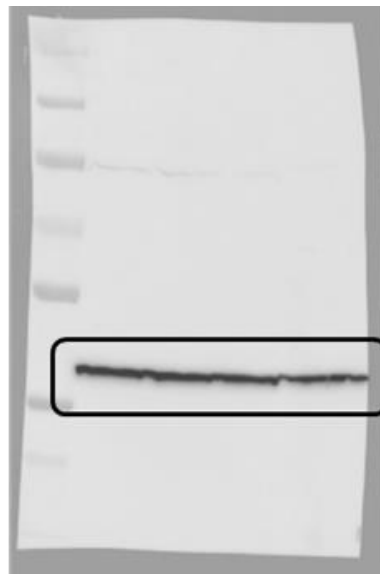

Lamin B1

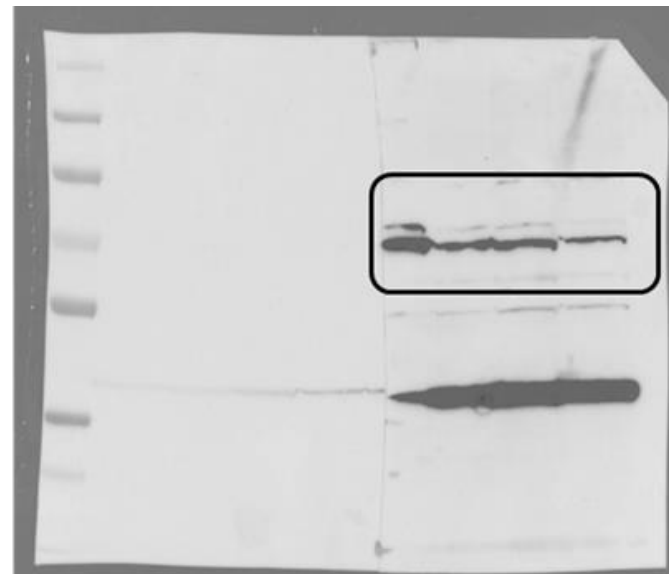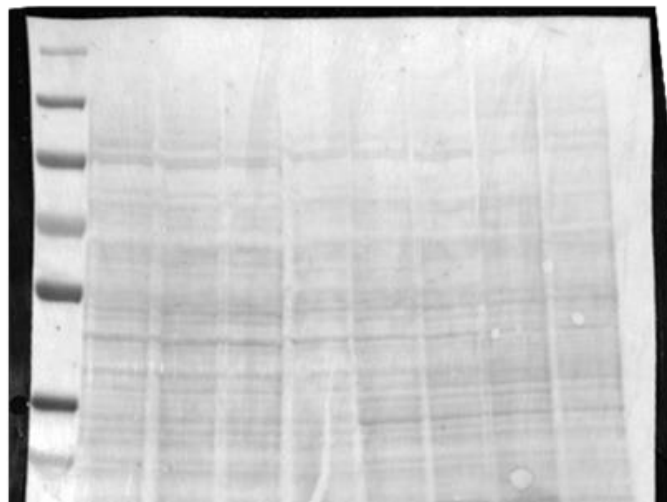

Uncropped Figure 4

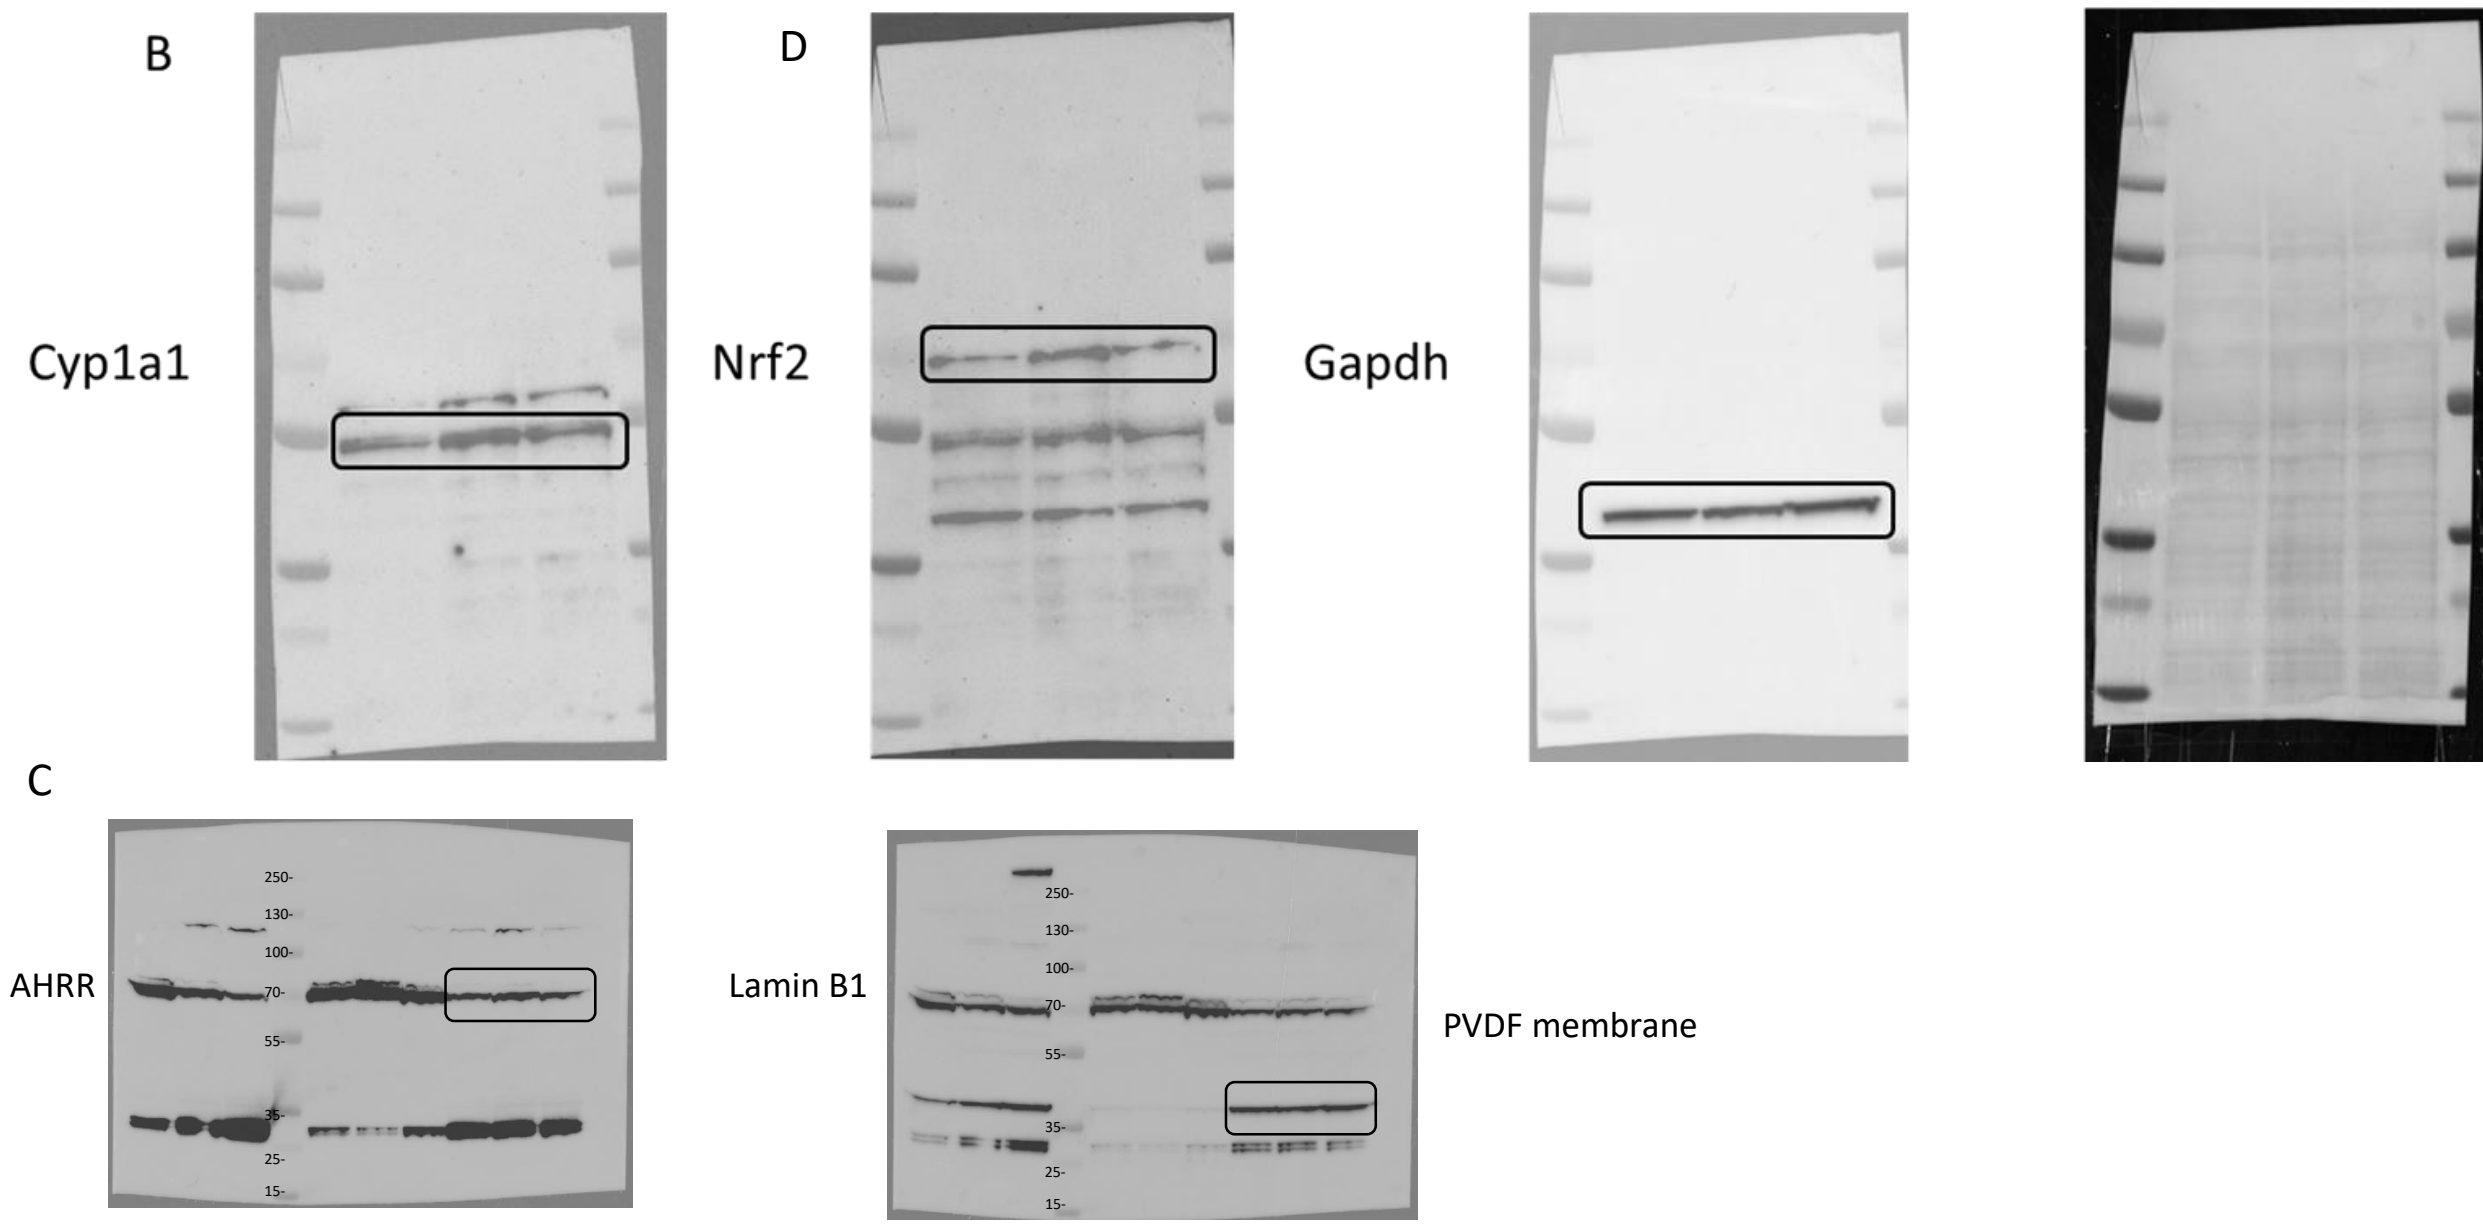

**Uncropped Figure 5**

GFP

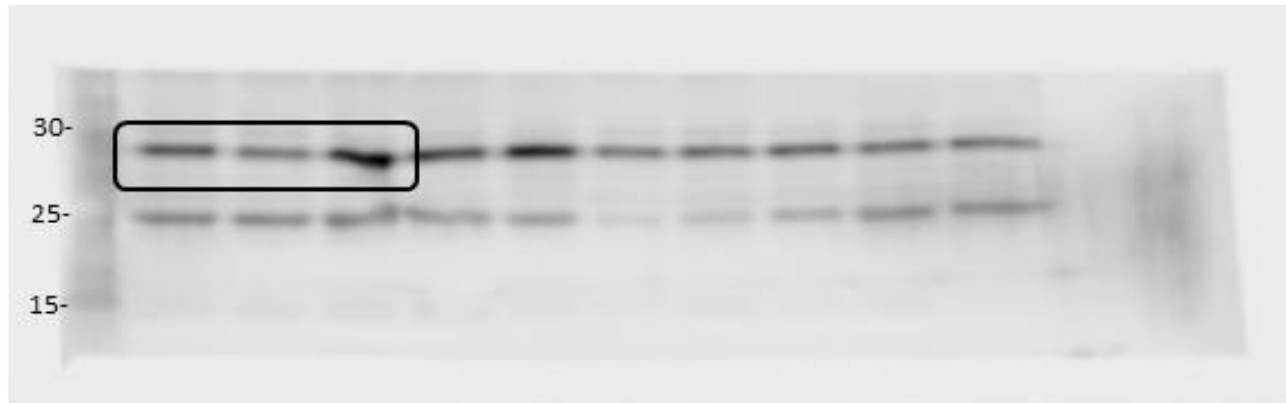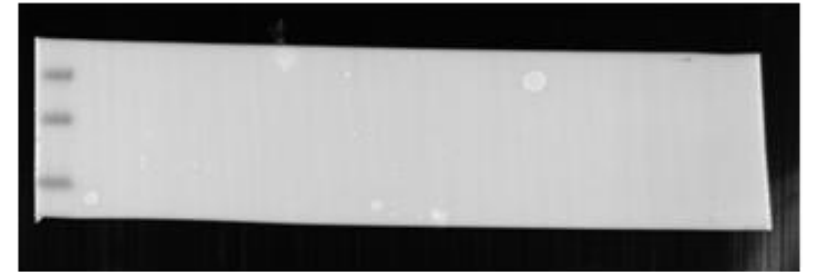

$\beta$ -actin

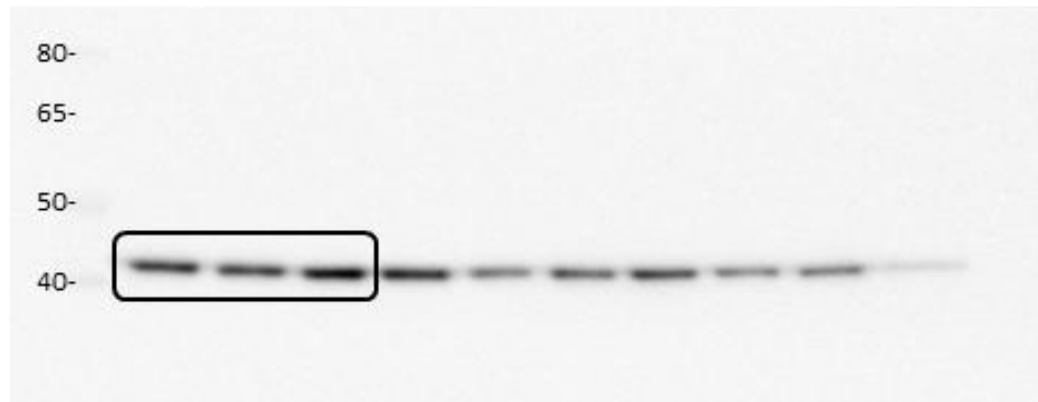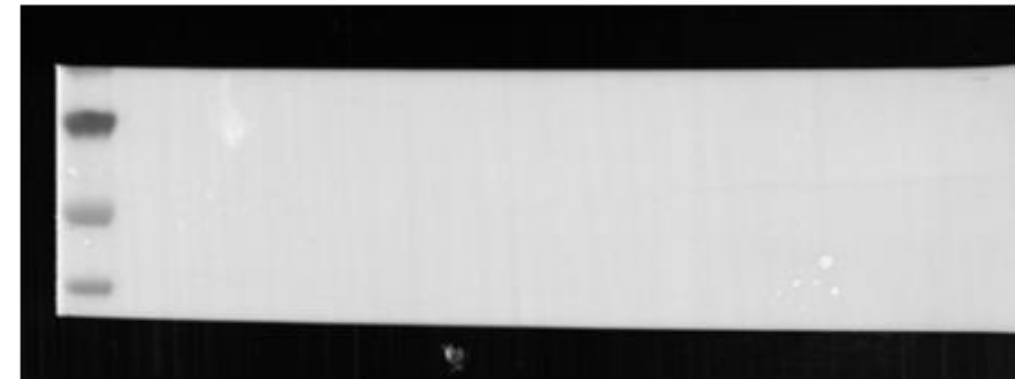

Uncropped Figure 6A

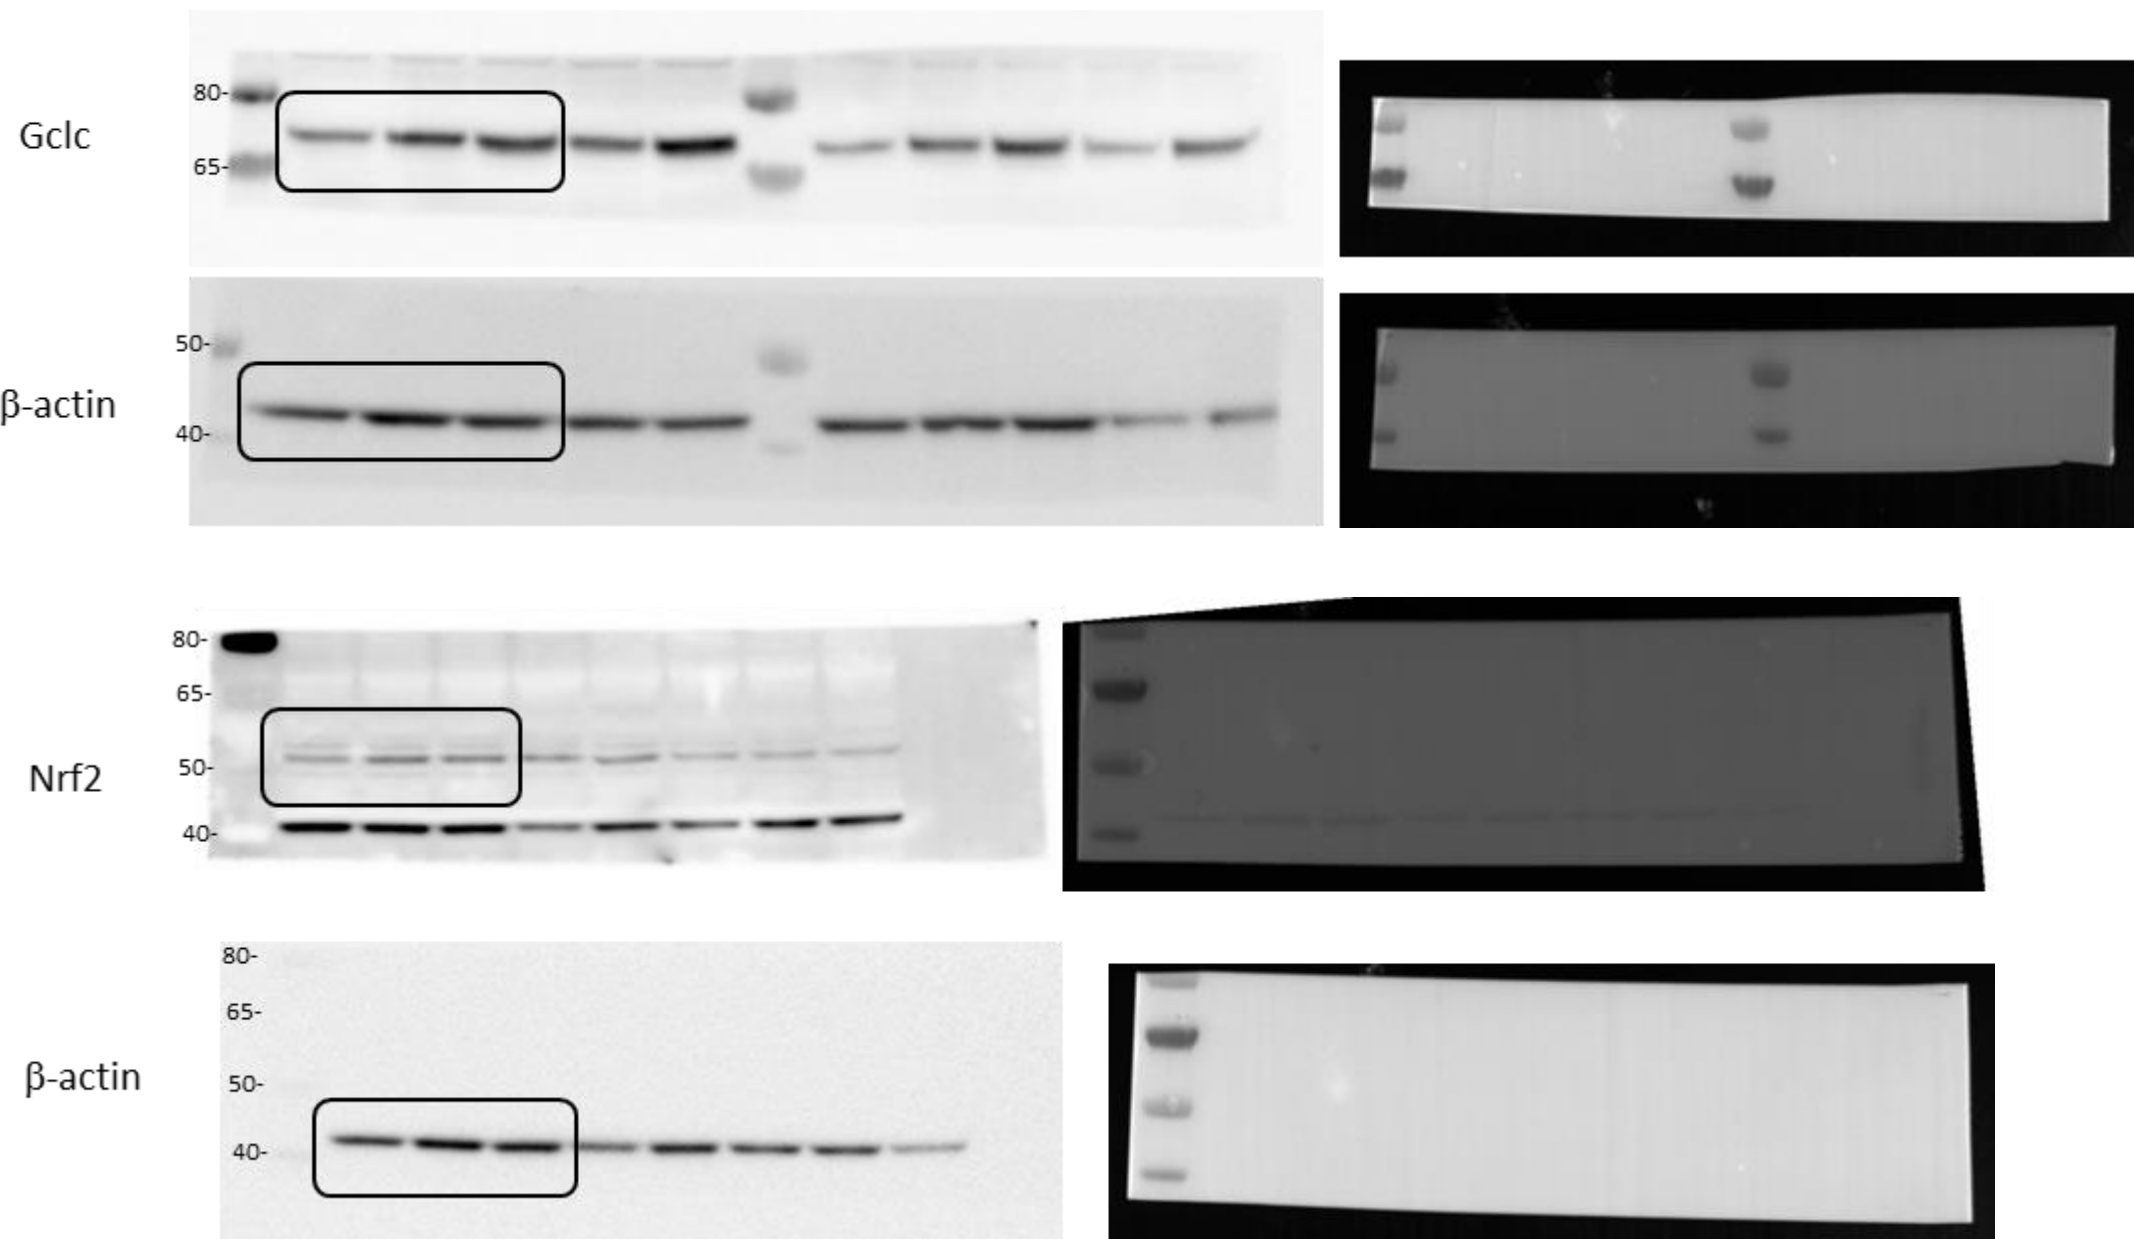

Uncropped Figure 6B and C

GFP

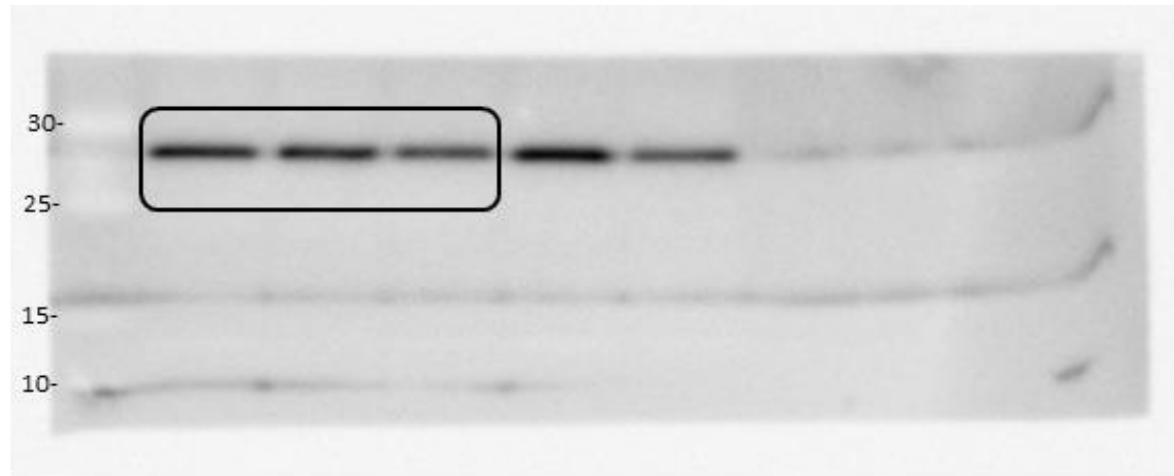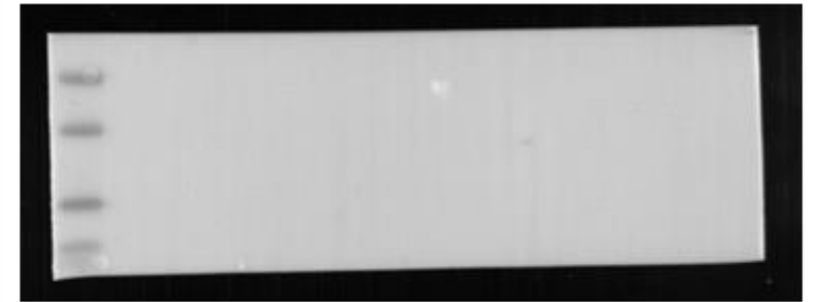

$\beta$ -actin

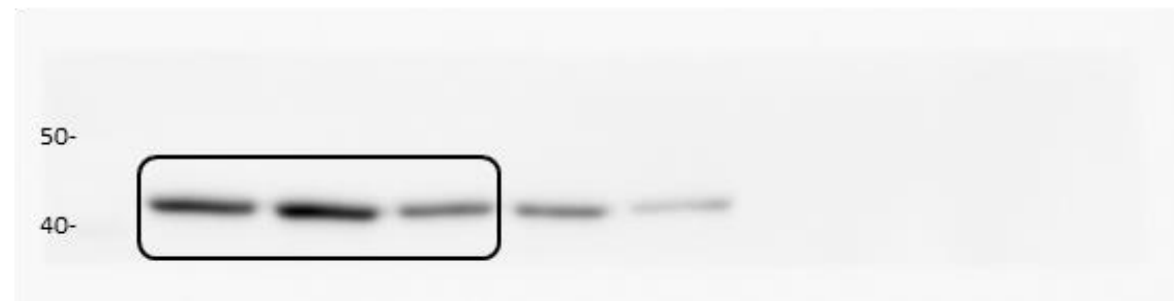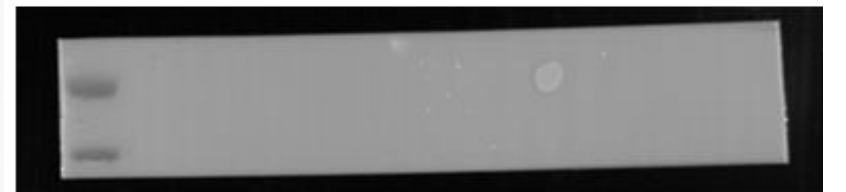

Uncropped Figure 7

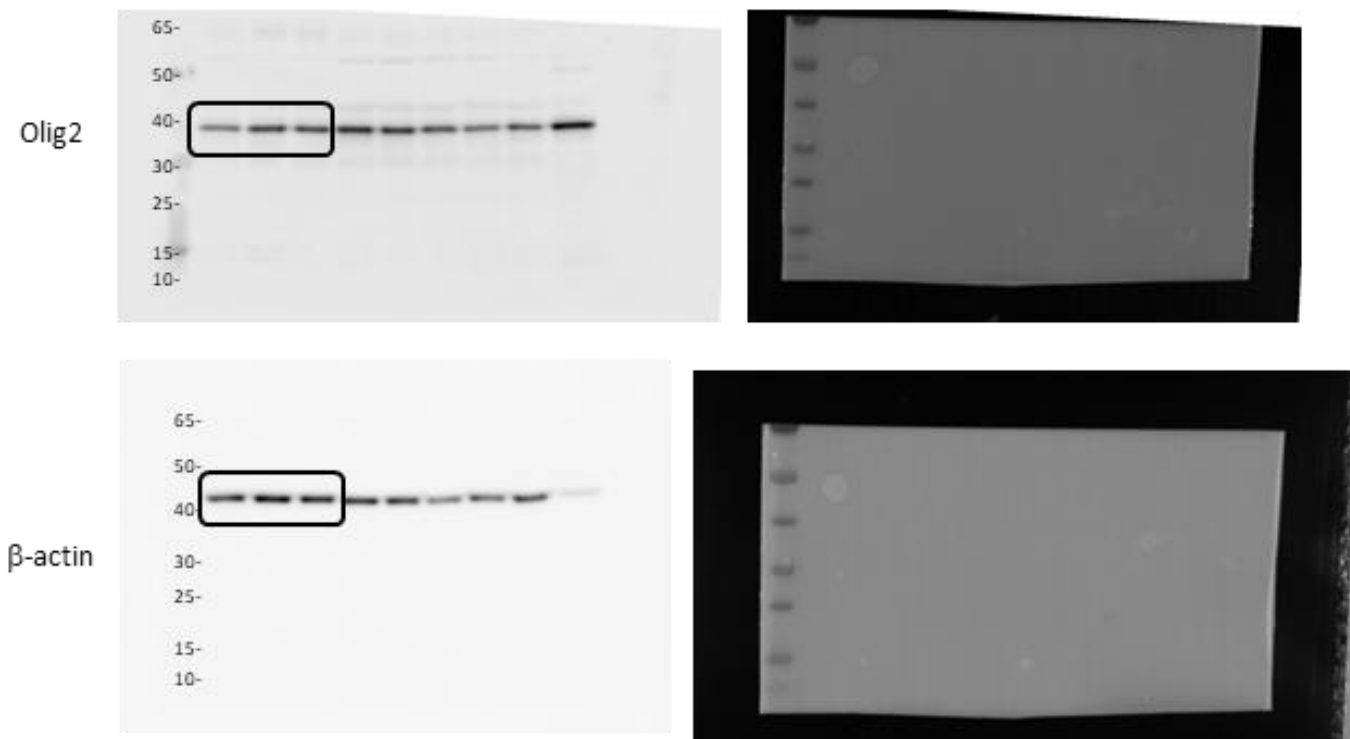

Uncropped Figure S3
