# Supplementary material for: The Antioxidant Drug Edaravone Binds to the Aryl Hydrocarbon Receptor (AHR) and Promotes the Downstream Signaling Pathway Activation
Source: MDPI journal article supplement (doi:10.3390/biom14040443), 2024-04-04
Supplement: s1 [file s1]

**Table S1.** List of Taqman inventoried assays used for gene expression experiments

| Species   | Gene symbol | Assay code    |
|-----------|-------------|---------------|
| Mouse     | Gapdh       | Mm99999915_g1 |
|           | Ahrr        | Mm00477443_m1 |
|           | Cyp1a1      | Mm00487218_m1 |
|           | Cyp1b1      | Mm00487229_m1 |
| Human     | Gapdh       | Hs99999905_m1 |
|           | Ahrr        | Hs01005075_m1 |
|           | Cyp1a1      | Hs01054796_g1 |
| Zebrafish | Gapdh       | Dr03436842_m1 |
|           | Cyp1a       | Dr03112444_m1 |
|           | Ahrra       | Dr03426356_m1 |
|           | Ahrrb       | Dr03091142_m1 |
