# Supplementary material for: The Antioxidant Drug Edaravone Binds to the Aryl Hydrocarbon Receptor (AHR) and Promotes the Downstream Signaling Pathway Activation
Source: Biomolecules. 2024 Apr 4;14(4):443. doi: 10.3390/biom14040443 (PMC11047889; doi:10.3390/biom14040443)
Supplement: Supplementary file 1 [file biomolecules-14-00443-s001.zip]

Archive with 4 entries (4 files):
- biomolecules-2853571-Table S1.pdf
- Manuscript.v8_Spreadsheet_S1.xlsx
- Manuscript.v8_Supplementary_Figures_revised.pdf
- Manuscript.v8_Supplementary_material_Uncropped_WB.pdf
