# Supplementary material for: The Antioxidant Drug Edaravone Binds to the Aryl Hydrocarbon Receptor (AHR) and Promotes the Downstream Signaling Pathway Activation
Source: Biomolecules. 2024 Apr 4;14(4):443. doi: 10.3390/biom14040443 (PMC11047889; doi:10.3390/biom14040443)
Supplement: Supplementary file 1 [file biomolecules-14-00443-s001.zip › Manuscript.v8_Spreadsheet_S1.xlsx]

## Sheet: ALL
ID	EDA Avg (log2)	DMSO Avg (log2)	Fold Change	P-val	FDR P-val	Gene Symbol
Ahrr	2.83	1.06	3.4	0.0044	0.8359	Ahrr
Pafah2	1.45	0.28	2.24	0.058	0.8359	Pafah2
Lrig3	2.53	1.47	2.09	0.1463	0.8359	Lrig3
Capn7	2.71	1.65	2.09	0.2332	0.8359	Capn7
Plec	7.28	6.27	2.01	0.0011	0.8359	Plec
LOC108167784	2.35	1.39	1.96	0.035	0.8359	LOC108167784
Plekha4	1.89	0.96	1.91	0.0202	0.8359	Plekha4
Abcg1	3.58	2.66	1.89	0.0847	0.8359	Abcg1
Phf24	1.78	0.87	1.88	0.1652	0.8359	Phf24
Cldn15	1.34	0.46	1.85	0.0704	0.8359	Cldn15
Kdm5d	2.41	1.54	1.83	0.5106	0.9222	Kdm5d
Gm36556	1.91	1.04	1.83	0.0928	0.8359	Gm36556
Bbs9	2.17	1.31	1.81	0.3549	0.8589	Bbs9
Slc39a3	4.17	3.33	1.8	0.0466	0.8359	Slc39a3
Smc1a	1.79	0.96	1.79	0.0866	0.8359	Smc1a
S1pr2	2.51	1.67	1.78	0.0669	0.8359	S1pr2
Ntn1	5.08	4.26	1.77	0.1083	0.8359	Ntn1
Btbd19	2.38	1.55	1.77	0.1615	0.8359	Btbd19
Per2	2.95	2.13	1.76	0.3145	0.838	Per2
Fhit	1.58	0.77	1.76	0.0167	0.8359	Fhit
Klf9	2.66	1.85	1.75	0.04	0.8359	Klf9
P3h1	2.72	1.91	1.75	0.2937	0.8359	P3h1
Zfp395	2.08	1.27	1.75	0.0419	0.8359	Zfp395
Ppargc1a	1.3	0.5	1.74	0.3456	0.8589	Ppargc1a
Ceacam1	1.69	0.9	1.72	0.4325	0.8672	Ceacam1
Gm35339	1.36	0.57	1.72	0.1871	0.8359	Gm35339
Krt73	1.17	0.39	1.72	0.0599	0.8359	Krt73
Crtac1	3.67	2.91	1.7	0.0168	0.8359	Crtac1
Ctsw	2.01	1.25	1.69	0.1728	0.8359	Ctsw
Efnb1	2.59	1.84	1.69	0.1898	0.8359	Efnb1
Ssbp2	1.69	0.94	1.68	0.035	0.8359	Ssbp2
Afg3l2	2.63	1.88	1.68	0.0518	0.8359	Afg3l2
Unc93b1	2.57	1.83	1.67	0.106	0.8359	Unc93b1
Col27a1	1.55	0.82	1.66	0.0855	0.8359	Col27a1
Sstr1	1.01	0.28	1.66	0.0647	0.8359	Sstr1
Ghrh	1.37	0.64	1.65	0.2031	0.8359	Ghrh
Mitf	1.22	0.5	1.64	0.157	0.8359	Mitf
Epg5	3.17	2.45	1.64	0.0529	0.8359	Epg5
Jmjd4	2.47	1.75	1.64	0.0431	0.8359	Jmjd4
Cyth2	2.04	1.33	1.63	0.1481	0.8359	Cyth2
Adra1d	1.53	0.83	1.63	0.1153	0.8359	Adra1d
Dlec1	1.65	0.95	1.63	0.0426	0.8359	Dlec1
Gch1	0.99	0.28	1.63	0.0649	0.8359	Gch1
Catsperd	0.72	0.02	1.63	0.0233	0.8359	Catsperd
Olfml2a	1.16	0.46	1.62	0.0099	0.8359	Olfml2a
Pink1	5.51	4.81	1.62	0.0414	0.8359	Pink1
Cyp1b1	4.22	3.53	1.62	0.028	0.8359	Cyp1b1
Wnt7b	1.01	0.31	1.62	0.0187	0.8359	Wnt7b
Hhatl	1.09	0.4	1.62	0.0423	0.8359	Hhatl
Rarg	2.41	1.72	1.62	0.074	0.8359	Rarg
Poll	1.98	1.29	1.62	0.0788	0.8359	Poll
Nfkbie	3.05	2.36	1.61	0.1155	0.8359	Nfkbie
Kremen1	2.76	2.07	1.61	0.0124	0.8359	Kremen1
C1qtnf1	3.09	2.4	1.61	0.0818	0.8359	C1qtnf1
Dph2	1.74	1.06	1.61	0.1249	0.8359	Dph2
Morn2	2.8	2.12	1.6	0.1797	0.8359	Morn2
Rph3a	1.93	1.26	1.59	0.2217	0.8359	Rph3a
Panx2	1.83	1.16	1.59	0.1601	0.8359	Panx2
Smad3	4.47	3.8	1.59	0.1048	0.8359	Smad3
Dleu7	1.48	0.82	1.59	0.4202	0.8589	Dleu7
Arnt2	3.33	2.66	1.59	0.0626	0.8359	Arnt2
Rnf223	2.27	1.6	1.59	0.1436	0.8359	Rnf223
Tmem28	2.96	2.3	1.58	0.1272	0.8359	Tmem28
Gnmt	1.29	0.63	1.58	0.0023	0.8359	Gnmt
Xrcc6bp1	1.96	1.3	1.58	0.0076	0.8359	Xrcc6bp1
Peg10	1.83	1.17	1.57	0.5396	0.9417	Peg10
Gpr27	2.75	2.09	1.57	0.0774	0.8359	Gpr27
Kif4	2.15	1.5	1.57	0.0612	0.8359	Kif4
Rilpl2	3.05	2.4	1.57	0.0431	0.8359	Rilpl2
Klhl3	3.5	2.85	1.57	0.0048	0.8359	Klhl3
Polr3e	2.21	1.56	1.57	0.1708	0.8359	Polr3e
Susd3	0.88	0.24	1.56	0.0123	0.8359	Susd3
Zfp850	1.08	0.44	1.56	0.1642	0.8359	Zfp850
Dnmbp	2.96	2.32	1.56	0.0211	0.8359	Dnmbp
Rnf126	2.9	2.26	1.55	0.0168	0.8359	Rnf126
Slamf8	0.97	0.34	1.55	0.0963	0.8359	Slamf8
Trim11	3.54	2.9	1.55	0.0311	0.8359	Trim11
Foxo6	4.68	4.05	1.55	0.1011	0.8359	Foxo6
Nacc2	5.5	4.87	1.55	0.0878	0.8359	Nacc2
Fam210b	2.94	2.31	1.55	0.0122	0.8359	Fam210b
Mef2c	2.23	1.61	1.54	0.1163	0.8359	Mef2c
Dip2a	4.61	3.98	1.54	0.0951	0.8359	Dip2a
Cd22	0.92	0.29	1.54	0.5331	0.9368	Cd22
Trim62	6.67	6.05	1.54	0.0241	0.8359	Trim62
Tap1	1.12	0.49	1.54	0.2031	0.8359	Tap1
Ccsap	2.04	1.41	1.54	0.0103	0.8359	Ccsap
Gm38402	2.01	1.38	1.54	0.0941	0.8359	Gm38402
Zic1	4.78	4.16	1.54	0.2353	0.8359	Zic1
Arhgef4	4.97	4.35	1.53	0.0242	0.8359	Arhgef4
Apcdd1	6.75	6.14	1.53	0.0251	0.8359	Apcdd1
Nhs	4.06	3.45	1.53	0.0371	0.8359	Nhs
Slc35f2	2.83	2.21	1.53	0.2447	0.8359	Slc35f2
Col2a1	2.98	2.37	1.53	0.1191	0.8359	Col2a1
Gm41795	1.97	1.37	1.52	0.4691	0.8941	Gm41795
Zmynd15	1.7	1.1	1.52	0.0177	0.8359	Zmynd15
Wdr91	3.16	2.55	1.52	0.0589	0.8359	Wdr91
Rassf4	3.3	2.69	1.52	0.0095	0.8359	Rassf4
Itpr1	0.81	0.2	1.52	0.3784	0.8589	Itpr1
Flot1	4.35	3.75	1.52	0.0294	0.8359	Flot1
Dock5	1.34	0.74	1.52	0.1158	0.8359	Dock5
Chodl	1.75	1.15	1.52	0.2771	0.8359	Chodl
4933412E12Rik	1.33	0.73	1.52	0.0367	0.8359	4933412E12Rik
Rasl10b	7.39	6.78	1.52	0.0399	0.8359	Rasl10b
Ttc12	0.56	-0.04	1.51	0.0694	0.8359	Ttc12
Fuz	4.28	3.69	1.51	0.0557	0.8359	Fuz
Lhfpl2	4.16	3.57	1.51	0.064	0.8359	Lhfpl2
Gpr25	0.67	0.08	1.51	0.1098	0.8359	Gpr25
Naaladl2	1.82	1.23	1.51	0.09	0.8359	Naaladl2
Ankrd24	3.54	2.95	1.51	0.003	0.8359	Ankrd24
B4galnt1	4.87	4.28	1.5	0.0132	0.8359	B4galnt1
Dopey2	2.82	2.23	1.5	0.1486	0.8359	Dopey2
Foxo4	6.21	5.63	1.5	0.0162	0.8359	Foxo4
Syngr2	2.88	2.29	1.5	0.0611	0.8359	Syngr2
Nfkbiz	1.82	1.23	1.5	0.0557	0.8359	Nfkbiz
Stxbp5l	1.13	0.55	1.5	0.0092	0.8359	Stxbp5l
Rmrp	11.35	10.77	1.5	0.2194	0.8359	Rmrp
Onecut2	1.31	0.73	1.5	0.0074	0.8359	Onecut2
Map4k2	5.07	4.49	1.5	0.0661	0.8359	Map4k2
Gsx2	1.85	1.27	1.49	0.1246	0.8359	Gsx2
Syt3	1.78	1.2	1.49	0.2527	0.8359	Syt3
LOC102632142	0.98	0.4	1.49	0.2156	0.8359	LOC102632142
Crocc	5.89	5.31	1.49	0.0367	0.8359	Crocc
Atp8b2	5.76	5.19	1.49	0.107	0.8359	Atp8b2
Rffl	1.87	1.29	1.49	0.1187	0.8359	Rffl
Pcsk1n	4.74	4.16	1.49	0.1282	0.8359	Pcsk1n
Acsl6	3.5	2.93	1.49	0.1935	0.8359	Acsl6
Sik3	5.82	5.25	1.49	0.1682	0.8359	Sik3
Eif2s1	1.96	1.39	1.49	0.4751	0.8983	Eif2s1
P2ry6	1.43	0.86	1.49	0.102	0.8359	P2ry6
1700008J07Rik	0.91	0.33	1.49	0.0903	0.8359	1700008J07Rik
Cyp1a1	0.59	0.02	1.49	0.0009	0.8359	Cyp1a1
Osgin1	1.12	0.55	1.49	0.1607	0.8359	Osgin1
Nid1	1.25	0.68	1.49	0.0605	0.8359	Nid1
Zfp768	5.45	4.88	1.49	0.0781	0.8359	Zfp768
Ube2e1	2.81	2.24	1.48	0.0345	0.8359	Ube2e1
Irgq	8.5	7.93	1.48	0.0078	0.8359	Irgq
Mylip	2.22	1.65	1.48	0.6343	0.9974	Mylip
Asah2	0.67	0.11	1.48	0.1723	0.8359	Asah2
Yif1a	4.23	3.66	1.48	0.2059	0.8359	Yif1a
Klhl36	3.1	2.54	1.48	0.1365	0.8359	Klhl36
Spc25	1.13	0.56	1.48	0.2419	0.8359	Spc25
Exoc3l	1.92	1.36	1.48	0.148	0.8359	Exoc3l
Coa6	2.54	1.98	1.48	0.3822	0.8589	Coa6
Klhl21	2.8	2.24	1.48	0.3104	0.8359	Klhl21
Athl1	1.74	1.18	1.48	0.2676	0.8359	Athl1
Znhit1	6.23	5.66	1.48	0.0237	0.8359	Znhit1
Syt16	2.61	2.05	1.48	0.0856	0.8359	Syt16
Obox6	0.86	0.3	1.48	0.0098	0.8359	Obox6
LOC102633151	0.72	0.16	1.48	0.0923	0.8359	LOC102633151
Srxn1	1.36	0.8	1.47	0.3376	0.8589	Srxn1
Sdr42e1	0.79	0.23	1.47	0.0148	0.8359	Sdr42e1
Grik3	5.73	5.17	1.47	0.0629	0.8359	Grik3
Dolpp1	4.82	4.26	1.47	0.1295	0.8359	Dolpp1
Myo1b	1.55	0.99	1.47	0.4529	0.8827	Myo1b
Ankrd39	3.74	3.18	1.47	0.0344	0.8359	Ankrd39
Phip	3.5	2.95	1.47	0.087	0.8359	Phip
Anxa7	2.78	2.23	1.47	0.1506	0.8359	Anxa7
Mamdc4	3.38	2.83	1.47	0.0641	0.8359	Mamdc4
Spidr	1.78	1.22	1.47	0.4523	0.8824	Spidr
Wsb2	3.5	2.94	1.47	0.0902	0.8359	Wsb2
Spaca4	1.94	1.38	1.47	0.1235	0.8359	Spaca4
Gprin2	2.69	2.14	1.47	0.0119	0.8359	Gprin2
Snx33	1.61	1.06	1.46	0.0859	0.8359	Snx33
Syne4	2.35	1.8	1.46	0.0391	0.8359	Syne4
Lgi4	3.72	3.17	1.46	0.1009	0.8359	Lgi4
Lrrc73	3	2.45	1.46	0.7507	1	Lrrc73
Jade2	1.03	0.48	1.46	0.1975	0.8359	Jade2
Rpp25	2.31	1.76	1.46	0.0384	0.8359	Rpp25
Gm7694	1.21	0.67	1.46	0.145	0.8359	Gm7694
Col5a3	0.68	0.13	1.46	0.2505	0.8359	Col5a3
Extl1	0.94	0.4	1.46	0.2055	0.8359	Extl1
Gdpd3	1.38	0.84	1.46	0.1415	0.8359	Gdpd3
Kank3	1.48	0.94	1.46	0.6599	1	Kank3
Gm16108	1.16	0.62	1.46	0.3139	0.8374	Gm16108
Zfp28	3.81	3.27	1.46	0.0264	0.8359	Zfp28
Cd164	3.24	2.69	1.46	0.4075	0.8589	Cd164
Phykpl	3.36	2.82	1.46	0.3563	0.8589	Phykpl
Grhl1	1.67	1.13	1.45	0.2157	0.8359	Grhl1
Ptpn14	2.53	1.99	1.45	0.2996	0.8359	Ptpn14
Emid1	3.38	2.84	1.45	0.0792	0.8359	Emid1
Hpcal4	1.05	0.51	1.45	0.0295	0.8359	Hpcal4
Chrm1	1.46	0.92	1.45	0.1922	0.8359	Chrm1
Ccdc84	2.17	1.64	1.45	0.5191	0.9281	Ccdc84
Atoh8	4.92	4.38	1.45	0.0102	0.8359	Atoh8
Tep1	1.6	1.06	1.45	0.1678	0.8359	Tep1
Ttc7b	3.85	3.32	1.45	0.1713	0.8359	Ttc7b
Acan	5.02	4.48	1.45	0.0636	0.8359	Acan
Wisp2	3.87	3.33	1.45	0.118	0.8359	Wisp2
Kif17	1.76	1.23	1.45	0.1598	0.8359	Kif17
Eml2	1.99	1.46	1.45	0.301	0.8359	Eml2
Amigo2	1.98	1.45	1.45	0.1521	0.8359	Amigo2
Hrh3	1.14	0.61	1.45	0.0808	0.8359	Hrh3
LOC105245882	0.96	0.43	1.45	0.0125	0.8359	LOC105245882
Ramp1	4.02	3.48	1.45	0.1881	0.8359	Ramp1
Mafa	2.03	1.49	1.45	0.1852	0.8359	Mafa
Bmp2k	2.5	1.97	1.45	0.1853	0.8359	Bmp2k
Creg2	3.59	3.06	1.45	0.1154	0.8359	Creg2
Sbk2	0.72	0.19	1.45	0.1126	0.8359	Sbk2
Abcc1	3.68	3.15	1.45	0.1438	0.8359	Abcc1
Aif1l	4.77	4.24	1.45	0.0151	0.8359	Aif1l
3110062M04Rik	0.99	0.46	1.44	0.0634	0.8359	3110062M04Rik
Mief2	2.4	1.87	1.44	0.0979	0.8359	Mief2
2010203P06Rik	1.06	0.54	1.44	0.0812	0.8359	2010203P06Rik
Neat1	1.32	0.79	1.44	0.8624	1	Neat1
Aldh1a3	0.63	0.1	1.44	0.0231	0.8359	Aldh1a3
Bahcc1	7.46	6.94	1.44	0.2219	0.8359	Bahcc1
E4f1	4.37	3.84	1.44	0.0068	0.8359	E4f1
Fam184b	2.72	2.2	1.44	0.3773	0.8589	Fam184b
Tln2	3.35	2.83	1.44	0.1744	0.8359	Tln2
LOC105244124	0.61	0.08	1.44	0.07	0.8359	LOC105244124
Parp12	0.92	0.39	1.44	0.0178	0.8359	Parp12
Kif3b	4.22	3.7	1.44	0.108	0.8359	Kif3b
Dbp	1.07	0.54	1.44	0.2463	0.8359	Dbp
Dner	6.35	5.83	1.44	0.1199	0.8359	Dner
Apc2	9.33	8.81	1.44	0.0097	0.8359	Apc2
Ccne2	2.18	1.66	1.44	0.5268	0.9332	Ccne2
Sh3pxd2a	3.8	3.28	1.44	0.182	0.8359	Sh3pxd2a
Rhpn1	2.07	1.54	1.44	0.122	0.8359	Rhpn1
Ankrd13c	4.07	3.54	1.44	0.2398	0.8359	Ankrd13c
Adgra1	0.82	0.3	1.44	0.2829	0.8359	Adgra1
Ogfod2	3.85	3.33	1.43	0.1717	0.8359	Ogfod2
Csrnp1	3.22	2.7	1.43	0.2208	0.8359	Csrnp1
D130043K22Rik	0.81	0.29	1.43	0.3138	0.8373	D130043K22Rik
Smim10l2a	0.87	0.35	1.43	0.1975	0.8359	Smim10l2a
Thpo	0.97	0.45	1.43	0.0415	0.8359	Thpo
Baalc	1.31	0.8	1.43	0.1663	0.8359	Baalc
Cnnm3	6.79	6.28	1.43	0.0207	0.8359	Cnnm3
Gm11351	0.84	0.33	1.43	0.0942	0.8359	Gm11351
C030037D09Rik	0.61	0.1	1.43	0.4787	0.9011	C030037D09Rik
Noct	2.1	1.59	1.43	0.3084	0.8359	Noct
Slc27a4	8.67	8.15	1.43	0.0888	0.8359	Slc27a4
Sgms2	0.71	0.2	1.43	0.1074	0.8359	Sgms2
Ccdc157	3.95	3.44	1.43	0.0657	0.8359	Ccdc157
Otos	0.91	0.4	1.43	0.051	0.8359	Otos
Ptk2b	2.34	1.82	1.43	0.0201	0.8359	Ptk2b
Gpr88	2.78	2.27	1.43	0.0116	0.8359	Gpr88
Tpst1	3.17	2.66	1.43	0.3443	0.8589	Tpst1
Zfr2	4.37	3.86	1.43	0.015	0.8359	Zfr2
Plin1	0.8	0.28	1.43	0.1737	0.8359	Plin1
Kcnj9	3.15	2.64	1.43	0.0045	0.8359	Kcnj9
Fancf	4.23	3.72	1.42	0.1279	0.8359	Fancf
Trpc4	1.5	0.99	1.42	0.0089	0.8359	Trpc4
Igsf10	2.47	1.96	1.42	0.1909	0.8359	Igsf10
Fbxw5	3.73	3.22	1.42	0.2311	0.8359	Fbxw5
Slc29a2	4.33	3.82	1.42	0.0084	0.8359	Slc29a2
Gm16486	0.94	0.43	1.42	0.1088	0.8359	Gm16486
Syngr4	0.78	0.27	1.42	0.2766	0.8359	Syngr4
Clic3	2.82	2.31	1.42	0.1713	0.8359	Clic3
Sdr39u1	2.28	1.77	1.42	0.093	0.8359	Sdr39u1
Gramd2	3.6	3.09	1.42	0.0259	0.8359	Gramd2
Ctgf	3.22	2.71	1.42	0.0127	0.8359	Ctgf
Sorl1	3.15	2.64	1.42	0.2255	0.8359	Sorl1
Zfp407	3.26	2.76	1.42	0.1661	0.8359	Zfp407
Cacna1b	6.28	5.77	1.42	0.0389	0.8359	Cacna1b
Irx1	2.32	1.82	1.42	0.0634	0.8359	Irx1
Vwa5b2	2.58	2.07	1.42	0.0737	0.8359	Vwa5b2
Wdr4	2.76	2.26	1.42	0.47	0.8953	Wdr4
Mast4	2.25	1.75	1.42	0.3137	0.8373	Mast4
Ythdc1	4.5	4	1.42	0.2323	0.8359	Ythdc1
Slc1a6	1.15	0.65	1.42	0.0614	0.8359	Slc1a6
Slc7a6os	1.39	0.89	1.42	0.1519	0.8359	Slc7a6os
Lmo2	0.65	0.15	1.42	0.2061	0.8359	Lmo2
LOC108167344	1.86	1.36	1.42	0.4946	0.9135	LOC108167344
Wnt5b	4.11	3.61	1.41	0.016	0.8359	Wnt5b
Cspg4	5.15	4.65	1.41	0.0817	0.8359	Cspg4
Amph	4.12	3.62	1.41	0.3099	0.8359	Amph
Micall1	6.31	5.81	1.41	0.0311	0.8359	Micall1
Smim20	2.93	2.43	1.41	0.0628	0.8359	Smim20
Susd5	3.81	3.31	1.41	0.226	0.8359	Susd5
Aff1	1.23	0.73	1.41	0.2342	0.8359	Aff1
Igfbp4	4.04	3.55	1.41	0.1021	0.8359	Igfbp4
Arrdc2	3.91	3.41	1.41	0.0375	0.8359	Arrdc2
Zfp853	1.31	0.81	1.41	0.3451	0.8589	Zfp853
Il17ra	5.83	5.33	1.41	0.0033	0.8359	Il17ra
C77370	0.53	0.04	1.41	0.1849	0.8359	C77370
Igsf1	0.65	0.15	1.41	0.1317	0.8359	Igsf1
Jph4	5.97	5.48	1.41	0.0322	0.8359	Jph4
Vps8	4.47	3.98	1.41	0.1361	0.8359	Vps8
Sox8	9.24	8.75	1.41	0.0924	0.8359	Sox8
Abca8a	1.47	0.98	1.41	0.1864	0.8359	Abca8a
Kcnip2	1.56	1.06	1.41	0.1815	0.8359	Kcnip2
Lipg	0.84	0.35	1.41	0.0316	0.8359	Lipg
Kbtbd6	1.04	0.54	1.41	0.1706	0.8359	Kbtbd6
Zfp90	5.74	5.25	1.41	0.0657	0.8359	Zfp90
Ift140	5.32	4.83	1.41	0.1482	0.8359	Ift140
Reep4	1.46	0.97	1.41	0.1887	0.8359	Reep4
2810429I04Rik	1.04	0.55	1.4	0.6393	1	2810429I04Rik
Slc6a19	1.24	0.75	1.4	0.1349	0.8359	Slc6a19
Fndc1	1.05	0.56	1.4	0.5148	0.9248	Fndc1
Urgcp	4.49	4	1.4	0.1147	0.8359	Urgcp
Ifit2	0.93	0.44	1.4	0.9207	1	Ifit2
Glra2	1.54	1.05	1.4	0.3198	0.8436	Glra2
Pik3c2b	5.2	4.71	1.4	0.0148	0.8359	Pik3c2b
St8sia5	1.11	0.62	1.4	0.4228	0.8601	St8sia5
Irf2bp2	5.65	5.16	1.4	0.1292	0.8359	Irf2bp2
Nfatc2	4.23	3.74	1.4	0.04	0.8359	Nfatc2
Fkbp8	6.42	5.94	1.4	0.1651	0.8359	Fkbp8
Fpgs	3.04	2.56	1.4	0.0438	0.8359	Fpgs
Lamtor2	3.19	2.71	1.4	0.0123	0.8359	Lamtor2
Gpr162	5.05	4.57	1.4	0.0442	0.8359	Gpr162
Cflar	1.84	1.36	1.4	0.7537	1	Cflar
Prr22	3.39	2.91	1.4	0.2256	0.8359	Prr22
Ccdc170	0.59	0.11	1.4	0.0484	0.8359	Ccdc170
Pdzd2	0.89	0.41	1.4	0.125	0.8359	Pdzd2
Gm36356	1.76	1.28	1.4	0.0319	0.8359	Gm36356
Iapp	0.53	0.04	1.4	0.0839	0.8359	Iapp
Stard8	1.92	1.43	1.4	0.162	0.8359	Stard8
Hspb3	1.19	0.71	1.4	0.0917	0.8359	Hspb3
Sirpa	4.67	4.19	1.4	0.0978	0.8359	Sirpa
Trpm4	2.12	1.64	1.4	0.0451	0.8359	Trpm4
Fras1	0.83	0.35	1.4	0.1163	0.8359	Fras1
Tcf3	1.25	0.77	1.4	0.0283	0.8359	Tcf3
Macrod2	3.18	2.7	1.39	0.0129	0.8359	Macrod2
Hlf	3.13	2.65	1.39	0.0969	0.8359	Hlf
Gm5607	2.06	1.58	1.39	0.0447	0.8359	Gm5607
Agbl3	1.01	0.53	1.39	0.7172	1	Agbl3
Rbpjl	4.33	3.85	1.39	0.0882	0.8359	Rbpjl
Gstm7	4.35	3.87	1.39	0.0583	0.8359	Gstm7
Pla2g12a	1.12	0.64	1.39	0.2386	0.8359	Pla2g12a
Prr5l	2.93	2.45	1.39	0.196	0.8359	Prr5l
Bend4	2.67	2.2	1.39	0.109	0.8359	Bend4
1700055D18Rik	1.71	1.24	1.39	0.1993	0.8359	1700055D18Rik
Klk9	0.52	0.05	1.39	0.1461	0.8359	Klk9
5033430I15Rik	0.69	0.21	1.39	0.2309	0.8359	5033430I15Rik
Tas1r3	1.17	0.69	1.39	0.336	0.8589	Tas1r3
Polr2f	4	3.52	1.39	0.4779	0.9006	Polr2f
Lrrc3	3.61	3.14	1.39	0.0565	0.8359	Lrrc3
Cnga4	0.86	0.39	1.39	0.2736	0.8359	Cnga4
Mroh6	1.27	0.79	1.39	0.0759	0.8359	Mroh6
Galnt3	1.5	1.03	1.39	0.1054	0.8359	Galnt3
Fkbp10	2.8	2.33	1.39	0.1168	0.8359	Fkbp10
Thsd7b	2.27	1.79	1.39	0.4311	0.867	Thsd7b
Chpf	5.23	4.76	1.39	0.1345	0.8359	Chpf
Mrps16	3.06	2.59	1.39	0.1444	0.8359	Mrps16
Col20a1	6.01	5.54	1.39	0.0146	0.8359	Col20a1
Ccdc85a	1.5	1.03	1.39	0.7755	1	Ccdc85a
Fcgr3	2.64	2.17	1.39	0.2252	0.8359	Fcgr3
Cant1	4.87	4.4	1.39	0.1125	0.8359	Cant1
Rims3	2.57	2.1	1.39	0.1891	0.8359	Rims3
Qsox1	4.07	3.6	1.39	0.0478	0.8359	Qsox1
Zfp236	3.28	2.81	1.39	0.2835	0.8359	Zfp236
Tmem63a	1.33	0.86	1.38	0.0217	0.8359	Tmem63a
March2	2.59	2.12	1.38	0.1334	0.8359	March2
Zfp712	1.18	0.71	1.38	0.8811	1	Zfp712
Arvcf	8.36	7.89	1.38	0.0209	0.8359	Arvcf
Map9	2.33	1.86	1.38	0.5291	0.9344	Map9
Mdk	1.74	1.27	1.38	0.2586	0.8359	Mdk
Plekha6	4.85	4.38	1.38	0.018	0.8359	Plekha6
Ada	2.26	1.79	1.38	0.0063	0.8359	Ada
Ccdc57	4.06	3.59	1.38	0.0251	0.8359	Ccdc57
Coro6	2.12	1.66	1.38	0.7419	1	Coro6
Nipsnap3b	1.81	1.35	1.38	0.0962	0.8359	Nipsnap3b
Plekhm2	4.65	4.18	1.38	0.5215	0.9294	Plekhm2
Dnaic2	3.4	2.94	1.38	0.0334	0.8359	Dnaic2
Chek2	0.75	0.29	1.38	0.1435	0.8359	Chek2
Gpld1	1.23	0.76	1.38	0.0689	0.8359	Gpld1
Lrrc56	2.79	2.32	1.38	0.0022	0.8359	Lrrc56
Oxsm	3.2	2.74	1.38	0.265	0.8359	Oxsm
Rpgrip1l	2	1.54	1.38	0.5873	0.9712	Rpgrip1l
Megf6	3.76	3.29	1.38	0.0055	0.8359	Megf6
Pold2	2.75	2.29	1.38	0.1106	0.8359	Pold2
Wrap73	1.08	0.62	1.38	0.3001	0.8359	Wrap73
Zbtb24	1.98	1.52	1.38	0.168	0.8359	Zbtb24
Egfl8	3.15	2.69	1.38	0.0701	0.8359	Egfl8
Gm34353	1.06	0.6	1.38	0.0275	0.8359	Gm34353
Adck1	2.63	2.17	1.38	0.9252	1	Adck1
Med9os	0.91	0.45	1.38	0.1401	0.8359	Med9os
Samd12	4.02	3.56	1.38	0.0201	0.8359	Samd12
Naprt	2.51	2.05	1.38	0.1798	0.8359	Naprt
Asb10	0.92	0.46	1.38	0.2383	0.8359	Asb10
1810043G02Rik	4.2	3.75	1.37	0.1564	0.8359	1810043G02Rik
Ssbp4	4.45	4	1.37	0.1668	0.8359	Ssbp4
Ttll8	0.58	0.12	1.37	0.1386	0.8359	Ttll8
Gm5176	0.63	0.17	1.37	0.1259	0.8359	Gm5176
Igfbp2	6.31	5.86	1.37	0.153	0.8359	Igfbp2
Gm5115	1.53	1.07	1.37	0.3769	0.8589	Gm5115
Ttf2	4.12	3.66	1.37	0.0437	0.8359	Ttf2
Rpusd3	5.55	5.09	1.37	0.0614	0.8359	Rpusd3
Rab11fip4	5.73	5.27	1.37	0.0563	0.8359	Rab11fip4
Galt	3.27	2.82	1.37	0.098	0.8359	Galt
Gm12758	0.86	0.41	1.37	0.1213	0.8359	Gm12758
Tox2	3.84	3.39	1.37	0.0611	0.8359	Tox2
Icam1	1.56	1.1	1.37	0.838	1	Icam1
Rltpr	0.58	0.13	1.37	0.1187	0.8359	Rltpr
Zfp646	3.53	3.07	1.37	0.2154	0.8359	Zfp646
Rsph9	1.25	0.8	1.37	0.1665	0.8359	Rsph9
Olfr286	0.52	0.06	1.37	0.2812	0.8359	Olfr286
Cdc42bpg	5.49	5.04	1.37	0.0448	0.8359	Cdc42bpg
Zfp956	2.47	2.02	1.37	0.2432	0.8359	Zfp956
Spr	2.02	1.57	1.37	0.1857	0.8359	Spr
Gdpd2	3.46	3	1.37	0.0154	0.8359	Gdpd2
Stamos	1.75	1.3	1.37	0.1782	0.8359	Stamos
Spag8	0.57	0.12	1.37	0.092	0.8359	Spag8
Lrp2	3.62	3.17	1.37	0.3027	0.8359	Lrp2
Chmp1a	6.12	5.67	1.37	0.2415	0.8359	Chmp1a
Nat8f4	1.39	0.93	1.37	0.1158	0.8359	Nat8f4
Kcnh7	1.12	0.67	1.37	0.2627	0.8359	Kcnh7
2010320O07Rik	1.18	0.73	1.37	0.7069	1	2010320O07Rik
Mamdc2	1.41	0.95	1.37	0.643	1	Mamdc2
Naga	1.7	1.25	1.37	0.9647	1	Naga
L3mbtl3	0.57	0.12	1.37	0.1185	0.8359	L3mbtl3
Hivep2	1.34	0.89	1.37	0.2038	0.8359	Hivep2
Prom1	0.71	0.26	1.37	0.3809	0.8589	Prom1
Pdxk	1.31	0.86	1.37	0.4312	0.8671	Pdxk
Slc35g1	2.59	2.14	1.37	0.1465	0.8359	Slc35g1
Kcnd2	4.13	3.68	1.37	0.1472	0.8359	Kcnd2
Pgbd1	1.43	0.98	1.37	0.6602	1	Pgbd1
Rwdd2b	2.47	2.02	1.37	0.0104	0.8359	Rwdd2b
Clip1	3.28	2.83	1.37	0.8796	1	Clip1
Lrrc14	2.94	2.49	1.37	0.3287	0.8531	Lrrc14
Dok5	1.89	1.44	1.37	0.4349	0.8682	Dok5
Sp9	3.35	2.9	1.36	0.0793	0.8359	Sp9
Map3k10	5.32	4.88	1.36	0.168	0.8359	Map3k10
Tfap4	1.67	1.22	1.36	0.1513	0.8359	Tfap4
Cib2	2.17	1.72	1.36	0.0156	0.8359	Cib2
Cdr2	2.29	1.84	1.36	0.2084	0.8359	Cdr2
Mxd4	8.98	8.54	1.36	0.0102	0.8359	Mxd4
Man1a2	1.72	1.27	1.36	0.3053	0.8359	Man1a2
Syk	0.55	0.1	1.36	0.1126	0.8359	Syk
Mterf4	3.59	3.14	1.36	0.2754	0.8359	Mterf4
Ablim3	1.66	1.21	1.36	0.079	0.8359	Ablim3
Gm35082	1.2	0.76	1.36	0.1845	0.8359	Gm35082
Col4a5	0.93	0.48	1.36	0.3645	0.8589	Col4a5
Mapk15	0.87	0.42	1.36	0.0823	0.8359	Mapk15
Rhof	2.23	1.78	1.36	0.3153	0.839	Rhof
B4galt2	5	4.55	1.36	0.1301	0.8359	B4galt2
Dyrk2	0.96	0.52	1.36	0.3332	0.8573	Dyrk2
Smad4	4.53	4.08	1.36	0.0694	0.8359	Smad4
Zkscan14	1.49	1.05	1.36	0.3281	0.8525	Zkscan14
Ufm1	3.51	3.07	1.36	0.3283	0.8526	Ufm1
Dnajc1	3.02	2.58	1.36	0.1144	0.8359	Dnajc1
Chd5	5.04	4.59	1.36	0.096	0.8359	Chd5
Glb1l2	1.39	0.95	1.36	0.1845	0.8359	Glb1l2
Padi2	1.33	0.88	1.36	0.1747	0.8359	Padi2
Cacna1h	3.56	3.12	1.36	0.1175	0.8359	Cacna1h
Scube3	1.98	1.53	1.36	0.1205	0.8359	Scube3
Cep164	2.35	1.9	1.36	0.4445	0.8762	Cep164
Tchp	3.25	2.81	1.36	0.0085	0.8359	Tchp
Ppara	2.35	1.91	1.36	0.1164	0.8359	Ppara
Gatad2b	3.96	3.52	1.36	0.4949	0.9136	Gatad2b
Trappc6a	4.32	3.88	1.36	0.0011	0.8359	Trappc6a
Tigd2	4.55	4.11	1.36	0.2962	0.8359	Tigd2
Edar	1.69	1.25	1.36	0.5721	0.9622	Edar
Gm5409	0.5	0.06	1.36	0.0405	0.8359	Gm5409
Rbm38	4.84	4.41	1.35	0.0959	0.8359	Rbm38
Ptprn	5.18	4.74	1.35	0.0904	0.8359	Ptprn
Npnt	0.9	0.46	1.35	0.2973	0.8359	Npnt
Stard10	5.08	4.64	1.35	0.0662	0.8359	Stard10
Mzb1	0.78	0.34	1.35	0.0583	0.8359	Mzb1
Tmub1	2.86	2.42	1.35	0.0877	0.8359	Tmub1
Sema4b	2.7	2.26	1.35	0.2453	0.8359	Sema4b
Map2k3	2.82	2.38	1.35	0.2655	0.8359	Map2k3
Pak7	2.53	2.09	1.35	0.9764	1	Pak7
Snx1	3.13	2.69	1.35	0.3868	0.8589	Snx1
Mcm3ap	1.85	1.41	1.35	0.3758	0.8589	Mcm3ap
Inadl	4.5	4.07	1.35	0.0061	0.8359	Inadl
Gng8	1.32	0.88	1.35	0.3302	0.8539	Gng8
A3galt2	2.74	2.3	1.35	0.0355	0.8359	A3galt2
Prodh	1.4	0.97	1.35	0.3237	0.8482	Prodh
Rrh	1.51	1.07	1.35	0.0047	0.8359	Rrh
Garem	3.48	3.04	1.35	0.1976	0.8359	Garem
Gtf2e1	3	2.57	1.35	0.4108	0.8589	Gtf2e1
Gm32296	0.99	0.56	1.35	0.0614	0.8359	Gm32296
Gjd3	1.21	0.78	1.35	0.1208	0.8359	Gjd3
Kif14	3.18	2.75	1.35	0.085	0.8359	Kif14
D030028A08Rik	0.54	0.11	1.35	0.4228	0.8601	D030028A08Rik
3110040N11Rik	2.65	2.22	1.35	0.1298	0.8359	3110040N11Rik
Mpp3	1.11	0.68	1.35	0.4957	0.9142	Mpp3
Gm10046	1.89	1.46	1.35	0.2334	0.8359	Gm10046
Mgat5b	6.81	6.38	1.35	0.051	0.8359	Mgat5b
B230206H07Rik	1.54	1.11	1.35	0.2007	0.8359	B230206H07Rik
Zfp668	3.74	3.31	1.35	0.2937	0.8359	Zfp668
Fam214a	3.2	2.77	1.35	0.0656	0.8359	Fam214a
Bean1	2.55	2.12	1.35	0.2691	0.8359	Bean1
Tollip	8.58	8.15	1.35	0.024	0.8359	Tollip
Mthfsd	6.97	6.54	1.35	0.0933	0.8359	Mthfsd
Ctla2b	0.7	0.28	1.35	0.3866	0.8589	Ctla2b
Mical1	1.09	0.66	1.35	0.2428	0.8359	Mical1
Tigd3	3.41	2.98	1.35	0.1921	0.8359	Tigd3
Ttc30b	0.61	0.19	1.34	0.1443	0.8359	Ttc30b
Cdkn2aip	2.64	2.21	1.34	0.9323	1	Cdkn2aip
Gm5434	1.64	1.22	1.34	0.1343	0.8359	Gm5434
Slc7a4	0.91	0.48	1.34	0.0756	0.8359	Slc7a4
4930427A07Rik	2.92	2.5	1.34	0.1874	0.8359	4930427A07Rik
Qpctl	1.82	1.39	1.34	0.9614	1	Qpctl
Tmprss9	1.38	0.96	1.34	0.2859	0.8359	Tmprss9
Gm15800	6.99	6.56	1.34	0.0058	0.8359	Gm15800
Sema3g	0.42	0	1.34	0.0591	0.8359	Sema3g
Slc26a6	2.12	1.69	1.34	0.2674	0.8359	Slc26a6
Pnmal1	4.24	3.82	1.34	0.1221	0.8359	Pnmal1
Rbm19	3.74	3.31	1.34	0.0922	0.8359	Rbm19
Nprl3	4.5	4.07	1.34	0.0069	0.8359	Nprl3
Elmod2	3.42	2.99	1.34	0.2842	0.8359	Elmod2
Plekhg1	5.3	4.87	1.34	0.052	0.8359	Plekhg1
H19	1.22	0.8	1.34	0.2919	0.8359	H19
Nptx2	4	3.57	1.34	0.2609	0.8359	Nptx2
Olfr692	1.61	1.18	1.34	0.0483	0.8359	Olfr692
Epha2	1.11	0.68	1.34	0.3276	0.8519	Epha2
H6pd	3.1	2.68	1.34	0.0331	0.8359	H6pd
Tex264	5.84	5.42	1.34	0.1788	0.8359	Tex264
Mboat2	3.99	3.57	1.34	0.1469	0.8359	Mboat2
Fat1	7.47	7.04	1.34	0.0044	0.8359	Fat1
Lsmem2	0.93	0.51	1.34	0.2115	0.8359	Lsmem2
Irx2	1.33	0.91	1.34	0.2538	0.8359	Irx2
Zmat4	1.24	0.82	1.34	0.1165	0.8359	Zmat4
Fra10ac1	1.14	0.72	1.34	0.269	0.8359	Fra10ac1
Sgsm1	2.23	1.81	1.34	0.3328	0.857	Sgsm1
4921531C22Rik	0.76	0.34	1.34	0.0724	0.8359	4921531C22Rik
Wdr7	5.9	5.48	1.34	0.0295	0.8359	Wdr7
Itpkb	3.79	3.37	1.34	0.1431	0.8359	Itpkb
Dnah9	1.55	1.13	1.34	0.4036	0.8589	Dnah9
Tmem8	2.96	2.54	1.34	0.1219	0.8359	Tmem8
Mknk2	6.54	6.12	1.34	0.0142	0.8359	Mknk2
Xrn2	1.73	1.31	1.34	0.2226	0.8359	Xrn2
Maml1	4.2	3.78	1.34	0.6992	1	Maml1
Skp2	2.01	1.59	1.34	0.3178	0.842	Skp2
Rxra	6.2	5.78	1.34	0.1183	0.8359	Rxra
Gli3	0.77	0.35	1.34	0.5718	0.9619	Gli3
Tmem198	1.73	1.31	1.34	0.0228	0.8359	Tmem198
Adamts5	2.59	2.17	1.34	0.1678	0.8359	Adamts5
Fzd10	0.5	0.09	1.34	0.024	0.8359	Fzd10
1700102P08Rik	1.13	0.71	1.34	0.5895	0.9721	1700102P08Rik
Ssh3	4.33	3.91	1.34	0.0659	0.8359	Ssh3
Med13l	5.63	5.22	1.34	0.0916	0.8359	Med13l
Hoga1	0.85	0.43	1.34	0.0794	0.8359	Hoga1
Nudt7	1.58	1.17	1.33	0.33	0.8537	Nudt7
Slc12a9	4.52	4.11	1.33	0.0097	0.8359	Slc12a9
Spire2	5.23	4.81	1.33	0.0598	0.8359	Spire2
Arfip2	3.42	3	1.33	0.0093	0.8359	Arfip2
Zfp772	2.52	2.1	1.33	0.0419	0.8359	Zfp772
Ccdc61	0.94	0.52	1.33	0.517	0.9261	Ccdc61
Chd8	3.89	3.48	1.33	0.0168	0.8359	Chd8
LOC108167931	0.89	0.48	1.33	0.2518	0.8359	LOC108167931
Ephx1	4.65	4.23	1.33	0.0004	0.7688	Ephx1
Prr19	1.11	0.69	1.33	0.5225	0.9298	Prr19
A430046D13Rik	0.69	0.27	1.33	0.1045	0.8359	A430046D13Rik
Ddx51	4.26	3.85	1.33	0.1525	0.8359	Ddx51
Cenpm	1.64	1.22	1.33	0.2915	0.8359	Cenpm
Asap3	5.67	5.26	1.33	0.0495	0.8359	Asap3
Tnks1bp1	5.77	5.35	1.33	0.0847	0.8359	Tnks1bp1
Fam76a	5.42	5	1.33	0.0125	0.8359	Fam76a
Psen1	7.09	6.68	1.33	0.0815	0.8359	Psen1
Ecd	5.53	5.12	1.33	0.1714	0.8359	Ecd
Cryab	1.55	1.13	1.33	0.1881	0.8359	Cryab
Psmb10	1.97	1.56	1.33	0.0562	0.8359	Psmb10
Mapkbp1	6.29	5.88	1.33	0.0067	0.8359	Mapkbp1
Hotairm1	0.46	0.05	1.33	0.1471	0.8359	Hotairm1
Bckdha	5.64	5.23	1.33	0.0175	0.8359	Bckdha
2410022M11Rik	0.96	0.55	1.33	0.4238	0.8614	2410022M11Rik
Mitd1	0.86	0.45	1.33	0.2702	0.8359	Mitd1
Zfp280b	4.86	4.45	1.33	0.0441	0.8359	Zfp280b
Nckipsd	2.18	1.77	1.33	0.1849	0.8359	Nckipsd
Syt1	3.72	3.31	1.33	0.1048	0.8359	Syt1
Srl	1.08	0.68	1.33	0.3056	0.8359	Srl
Zfp820	1.42	1.01	1.33	0.1109	0.8359	Zfp820
Il34	0.36	-0.05	1.33	0.0307	0.8359	Il34
Coa4	2.43	2.02	1.33	0.3105	0.8359	Coa4
Ttc30a1	0.63	0.22	1.33	0.7359	1	Ttc30a1
Pbx4	2.03	1.63	1.33	0.4628	0.8889	Pbx4
BC017158	2.75	2.35	1.33	0.0026	0.8359	BC017158
2310057M21Rik	1	0.59	1.33	0.5712	0.9613	2310057M21Rik
Zfp609	5.92	5.51	1.32	0.0187	0.8359	Zfp609
Cyb5r1	3	2.59	1.32	0.1492	0.8359	Cyb5r1
Il17c	1.37	0.96	1.32	0.4277	0.8645	Il17c
Zfp3	2.32	1.92	1.32	0.4765	0.8996	Zfp3
Erlin1	3.4	3	1.32	0.197	0.8359	Erlin1
Adamts1	1.59	1.18	1.32	0.5332	0.9368	Adamts1
Abhd17a	6.31	5.91	1.32	0.0283	0.8359	Abhd17a
Dusp6	2.07	1.66	1.32	0.4765	0.8996	Dusp6
Aplf	2.01	1.61	1.32	0.3392	0.8589	Aplf
Mrm2	2.82	2.42	1.32	0.2638	0.8359	Mrm2
Gpat2	0.53	0.12	1.32	0.32	0.8439	Gpat2
Lrfn1	4.78	4.38	1.32	0.3245	0.8487	Lrfn1
Notch3	2.24	1.84	1.32	0.0442	0.8359	Notch3
Enox2	2.17	1.76	1.32	0.2454	0.8359	Enox2
Diexf	2.24	1.84	1.32	0.0585	0.8359	Diexf
Zfp385b	4.6	4.2	1.32	0.0969	0.8359	Zfp385b
Sgpp1	2.27	1.87	1.32	0.8653	1	Sgpp1
Nxn	4.07	3.67	1.32	0.4137	0.8589	Nxn
Tango6	1.06	0.66	1.32	0.9799	1	Tango6
Parpbp	1.63	1.23	1.32	0.3761	0.8589	Parpbp
Zbtb16	3.72	3.32	1.32	0.0821	0.8359	Zbtb16
Ky	1.28	0.88	1.32	0.6394	1	Ky
Stat2	4.68	4.28	1.32	0.0716	0.8359	Stat2
Ngf	0.8	0.4	1.32	0.616	0.987	Ngf
Tsnaxip1	0.46	0.06	1.32	0.5306	0.9349	Tsnaxip1
Mpi	4.34	3.94	1.32	0.102	0.8359	Mpi
Dnah10	2.17	1.77	1.32	0.2808	0.8359	Dnah10
Trmt44	2.37	1.97	1.32	0.0502	0.8359	Trmt44
Cep131	1.86	1.46	1.32	0.4581	0.8856	Cep131
Nrcam	4.2	3.8	1.32	0.0716	0.8359	Nrcam
Mctp1	1.12	0.72	1.32	0.3443	0.8589	Mctp1
Syce2	1.68	1.28	1.32	0.1395	0.8359	Syce2
Efna2	5.19	4.79	1.32	0.1349	0.8359	Efna2
Phactr3	7.39	6.99	1.32	0.0675	0.8359	Phactr3
Lpar2	2.68	2.28	1.32	0.0585	0.8359	Lpar2
Ahr	1.5	1.1	1.32	0.1512	0.8359	Ahr
Grk5	5.33	4.93	1.32	0.1251	0.8359	Grk5
Tfr2	1.54	1.14	1.32	0.3493	0.8589	Tfr2
Snx12	6.49	6.09	1.32	0.077	0.8359	Snx12
Vangl2	6.86	6.47	1.32	0.0233	0.8359	Vangl2
B230217O12Rik	1.18	0.78	1.32	0.5335	0.9371	B230217O12Rik
Pcnx4	0.9	0.5	1.32	0.4462	0.8775	Pcnx4
Tm7sf2	4.92	4.52	1.32	0.1817	0.8359	Tm7sf2
Fbxl18	4.12	3.73	1.31	0.1119	0.8359	Fbxl18
Ido2	1.7	1.31	1.31	0.1649	0.8359	Ido2
Havcr2	1.19	0.79	1.31	0.5486	0.9474	Havcr2
Zfp764	1.41	1.01	1.31	0.1164	0.8359	Zfp764
Rexo1	5.98	5.58	1.31	0.11	0.8359	Rexo1
Klc1	4.41	4.01	1.31	0.5045	0.9198	Klc1
Fbxl5	2.2	1.8	1.31	0.5121	0.9232	Fbxl5
Gpsm3	2.26	1.87	1.31	0.3003	0.8359	Gpsm3
Mrps26	3.56	3.17	1.31	0.2579	0.8359	Mrps26
Parp10	1.89	1.5	1.31	0.2865	0.8359	Parp10
Plekhg3	2.93	2.54	1.31	0.3986	0.8589	Plekhg3
Plin4	1.6	1.21	1.31	0.4808	0.9017	Plin4
Dmrtb1	7.21	6.81	1.31	0.0772	0.8359	Dmrtb1
Bcat2	2.49	2.09	1.31	0.2385	0.8359	Bcat2
Prrg3	2.72	2.33	1.31	0.0837	0.8359	Prrg3
Elmod1	1.85	1.46	1.31	0.3049	0.8359	Elmod1
Prrt4	2.43	2.03	1.31	0.0769	0.8359	Prrt4
Rhobtb1	2.26	1.86	1.31	0.0294	0.8359	Rhobtb1
Atf3	1.99	1.6	1.31	0.8289	1	Atf3
Thrsp	1.38	0.98	1.31	0.0228	0.8359	Thrsp
Serpine1	1.04	0.65	1.31	0.1266	0.8359	Serpine1
Pwwp2a	1.75	1.36	1.31	0.0249	0.8359	Pwwp2a
Efhc1	1.16	0.77	1.31	0.2322	0.8359	Efhc1
Plcb3	5	4.61	1.31	0.0223	0.8359	Plcb3
Shisa7	6.56	6.17	1.31	0.1094	0.8359	Shisa7
Pou6f1	6.38	5.99	1.31	0.1566	0.8359	Pou6f1
LOC108167411	1.4	1.01	1.31	0.5949	0.977	LOC108167411
Dusp4	5.07	4.68	1.31	0.2493	0.8359	Dusp4
Gpr158	1.32	0.93	1.31	0.1294	0.8359	Gpr158
Gm16553	0.48	0.09	1.31	0.13	0.8359	Gm16553
Ubr7	4.51	4.12	1.31	0.1239	0.8359	Ubr7
Socs3	0.99	0.6	1.31	0.4805	0.9016	Socs3
Mmp24	4.26	3.88	1.31	0.0066	0.8359	Mmp24
Zfp184	2.01	1.62	1.31	0.0279	0.8359	Zfp184
Ebf3	0.72	0.34	1.31	0.0227	0.8359	Ebf3
Slc12a5	4.16	3.77	1.31	0.1437	0.8359	Slc12a5
Agpat2	1.19	0.8	1.31	0.5197	0.9284	Agpat2
Gas7	4.26	3.88	1.31	0.031	0.8359	Gas7
B3galt5	0.93	0.54	1.31	0.0775	0.8359	B3galt5
Ppargc1b	1.85	1.46	1.31	0.1643	0.8359	Ppargc1b
Efna1	1.54	1.15	1.31	0.2097	0.8359	Efna1
Gm30074	1.15	0.76	1.31	0.7161	1	Gm30074
Mboat4	0.73	0.35	1.31	0.0794	0.8359	Mboat4
Ucn2	0.48	0.09	1.31	0.6006	0.9805	Ucn2
Megf10	1.67	1.29	1.31	0.1326	0.8359	Megf10
Entpd2	2.82	2.44	1.31	0.6109	0.9849	Entpd2
Tbc1d22b	4.24	3.85	1.31	0.2368	0.8359	Tbc1d22b
Hdac9	1.76	1.38	1.31	0.6849	1	Hdac9
Smyd3	3.77	3.38	1.31	0.3926	0.8589	Smyd3
Lonp2	3.29	2.9	1.3	0.1321	0.8359	Lonp2
Ccdc51	1.55	1.16	1.3	0.7562	1	Ccdc51
Chst8	1.38	1	1.3	0.0536	0.8359	Chst8
Mpp6	3.76	3.38	1.3	0.534	0.9371	Mpp6
LOC108167364	0.39	0	1.3	0.1322	0.8359	LOC108167364
Bzrap1	3.78	3.4	1.3	0.18	0.8359	Bzrap1
Gramd4	5.76	5.38	1.3	0.3664	0.8589	Gramd4
Vax1	3.48	3.1	1.3	0.0292	0.8359	Vax1
Mdfi	1.01	0.62	1.3	0.2216	0.8359	Mdfi
Naif1	2.63	2.24	1.3	0.1858	0.8359	Naif1
Efhd1	2.11	1.72	1.3	0.7469	1	Efhd1
Fbxl12	3.81	3.43	1.3	0.0861	0.8359	Fbxl12
Zrsr1	2.03	1.65	1.3	0.8875	1	Zrsr1
Esrra	6.31	5.93	1.3	0.0241	0.8359	Esrra
Cilp2	1.97	1.59	1.3	0.3879	0.8589	Cilp2
Med31	1.49	1.11	1.3	0.2491	0.8359	Med31
Col16a1	2.81	2.43	1.3	0.2431	0.8359	Col16a1
Map3k2	1.3	0.92	1.3	0.4774	0.9005	Map3k2
Coro7	4.82	4.44	1.3	0.1516	0.8359	Coro7
Gpx7	0.59	0.21	1.3	0.2621	0.8359	Gpx7
Fnbp1	3.37	2.99	1.3	0.0614	0.8359	Fnbp1
B3gnt5	0.87	0.49	1.3	0.0397	0.8359	B3gnt5
Adamtsl4	0.74	0.36	1.3	0.5198	0.9284	Adamtsl4
Ankrd13d	5.36	4.98	1.3	0.0247	0.8359	Ankrd13d
Macrod1	2.62	2.24	1.3	0.1809	0.8359	Macrod1
Prune	4.18	3.8	1.3	0.4387	0.8714	Prune
A2m	0.87	0.49	1.3	0.1457	0.8359	A2m
Fastk	6.7	6.32	1.3	0.0711	0.8359	Fastk
Zfp444	2.52	2.14	1.3	0.1854	0.8359	Zfp444
0610005C13Rik	0.91	0.53	1.3	0.5109	0.9222	0610005C13Rik
Prrt3	0.75	0.37	1.3	0.0844	0.8359	Prrt3
Il1rap	4.5	4.13	1.3	0.1122	0.8359	Il1rap
Rdh10	3.38	3	1.3	0.2526	0.8359	Rdh10
Mab21l3	0.64	0.26	1.3	0.1042	0.8359	Mab21l3
Gm33046	1.73	1.35	1.3	0.1869	0.8359	Gm33046
Kansl3	3.67	3.3	1.3	0.1503	0.8359	Kansl3
Zc3h10	5.36	4.99	1.3	0.038	0.8359	Zc3h10
Dlx2	7.09	6.71	1.3	0.0249	0.8359	Dlx2
Flrt3	0.8	0.43	1.3	0.1056	0.8359	Flrt3
Tgfb3	1.43	1.06	1.3	0.1025	0.8359	Tgfb3
Slc22a15	0.4	0.03	1.3	0.0719	0.8359	Slc22a15
Dcp1a	4.3	3.92	1.3	0.2538	0.8359	Dcp1a
Atp8a2	2.07	1.7	1.3	0.2713	0.8359	Atp8a2
Bsn	1.03	0.66	1.3	0.232	0.8359	Bsn
C5ar1	0.63	0.26	1.29	0.3987	0.8589	C5ar1
Rom1	0.44	0.06	1.29	0.1368	0.8359	Rom1
Fam49a	3.11	2.74	1.29	0.1033	0.8359	Fam49a
Foxj3	5.53	5.15	1.29	0.1009	0.8359	Foxj3
Arid5a	4.3	3.93	1.29	0.3068	0.8359	Arid5a
Lgmn	6.15	5.78	1.29	0.013	0.8359	Lgmn
Tapbp	2.71	2.34	1.29	0.2183	0.8359	Tapbp
Prelp	1.49	1.12	1.29	0.2405	0.8359	Prelp
Dtwd2	2.79	2.42	1.29	0.0732	0.8359	Dtwd2
Pola2	2.35	1.98	1.29	0.22	0.8359	Pola2
Isyna1	1.67	1.3	1.29	0.2257	0.8359	Isyna1
Ttc23	0.87	0.5	1.29	0.1465	0.8359	Ttc23
Adck4	4.76	4.39	1.29	0.2962	0.8359	Adck4
Lyst	4.15	3.78	1.29	0.6138	0.986	Lyst
Hs3st6	0.44	0.07	1.29	0.1517	0.8359	Hs3st6
Gm33274	1.38	1.01	1.29	0.2473	0.8359	Gm33274
Itga7	2.61	2.24	1.29	0.1259	0.8359	Itga7
Nrarp	4.48	4.11	1.29	0.1548	0.8359	Nrarp
Napb	2.92	2.55	1.29	0.4571	0.885	Napb
Mttp	1.1	0.74	1.29	0.2902	0.8359	Mttp
Tppp	8.45	8.08	1.29	0.015	0.8359	Tppp
Kcnq2	5.75	5.38	1.29	0.2939	0.8359	Kcnq2
Trank1	1.23	0.86	1.29	0.9038	1	Trank1
Il10rb	2.29	1.92	1.29	0.4564	0.8842	Il10rb
Fam189a1	1.69	1.32	1.29	0.6107	0.9848	Fam189a1
Slc27a1	3.94	3.57	1.29	0.0321	0.8359	Slc27a1
Mllt6	4.23	3.86	1.29	0.1365	0.8359	Mllt6
Plekhm1	4.78	4.41	1.29	0.1292	0.8359	Plekhm1
F2rl1	0.99	0.62	1.29	0.1046	0.8359	F2rl1
Cgn	1.74	1.37	1.29	0.0098	0.8359	Cgn
Amt	4.07	3.7	1.29	0.0599	0.8359	Amt
Kcnk13	0.48	0.11	1.29	0.6343	0.9974	Kcnk13
Ppox	4.74	4.37	1.29	0.1341	0.8359	Ppox
Tacc3	3.46	3.09	1.29	0.5465	0.9466	Tacc3
Twsg1	4.39	4.02	1.29	0.2775	0.8359	Twsg1
1600020E01Rik	1.58	1.21	1.29	0.233	0.8359	1600020E01Rik
Sh2b1	3.76	3.4	1.29	0.2838	0.8359	Sh2b1
Gtpbp3	6.39	6.03	1.29	0.03	0.8359	Gtpbp3
Lrtm2	4.11	3.74	1.29	0.3315	0.8559	Lrtm2
Nthl1	4.85	4.49	1.29	0.0159	0.8359	Nthl1
Tmem253	0.43	0.06	1.29	0.4783	0.9011	Tmem253
P2ry2	5.35	4.99	1.29	0.0201	0.8359	P2ry2
Cd44	1.61	1.24	1.29	0.8068	1	Cd44
Angpt1	0.47	0.1	1.29	0.0324	0.8359	Angpt1
Armcx2	3.89	3.52	1.29	0.0928	0.8359	Armcx2
Ogg1	0.8	0.43	1.29	0.4672	0.8931	Ogg1
Dxo	2.18	1.81	1.29	0.6245	0.9911	Dxo
Ncapg2	0.7	0.34	1.29	0.4785	0.9011	Ncapg2
Ccdc3	0.49	0.12	1.29	0.081	0.8359	Ccdc3
Psme1	6.38	6.02	1.29	0.4269	0.8642	Psme1
Tsc1	1.5	1.14	1.29	0.062	0.8359	Tsc1
Mrpl55	3.06	2.7	1.29	0.1707	0.8359	Mrpl55
Dgki	3.51	3.15	1.29	0.122	0.8359	Dgki
Kcnj10	11.4	11.04	1.29	0.4266	0.864	Kcnj10
Dhx37	3.57	3.21	1.29	0.3328	0.857	Dhx37
Crtc2	4.4	4.03	1.29	0.1648	0.8359	Crtc2
Aspdh	3.56	3.2	1.29	0.0338	0.8359	Aspdh
Cntn6	0.89	0.52	1.29	0.1446	0.8359	Cntn6
Grin1	4.56	4.2	1.29	0.0987	0.8359	Grin1
Stab1	2.14	1.78	1.29	0.6065	0.9834	Stab1
Actl6a	2.97	2.6	1.29	0.7379	1	Actl6a
Zbtb7b	3.84	3.48	1.29	0.0932	0.8359	Zbtb7b
Igsf11	4.84	4.48	1.29	0.1889	0.8359	Igsf11
Tmem117	1.4	1.04	1.29	0.5251	0.9319	Tmem117
Ccdc163	3.09	2.73	1.29	0.4112	0.8589	Ccdc163
Arsa	4.93	4.57	1.28	0.1097	0.8359	Arsa
Tnpo2	5.1	4.74	1.28	0.1169	0.8359	Tnpo2
Mreg	0.65	0.29	1.28	0.2992	0.8359	Mreg
Tspyl2	6.4	6.04	1.28	0.1673	0.8359	Tspyl2
Cdk10	3.95	3.59	1.28	0.1163	0.8359	Cdk10
LOC108168990	1.38	1.02	1.28	0.7077	1	LOC108168990
Lrp4	4.48	4.12	1.28	0.0819	0.8359	Lrp4
Slc9a3r1	5.72	5.36	1.28	0.0364	0.8359	Slc9a3r1
Tbce	2.59	2.23	1.28	0.584	0.969	Tbce
Nceh1	6.5	6.14	1.28	0.2514	0.8359	Nceh1
Ier5l	4.54	4.18	1.28	0.1172	0.8359	Ier5l
Ica1l	2.4	2.04	1.28	0.1296	0.8359	Ica1l
Zfp939	1.4	1.04	1.28	0.4805	0.9016	Zfp939
Vwc2	2.57	2.22	1.28	0.1266	0.8359	Vwc2
Fam118b	2.69	2.33	1.28	0.3495	0.8589	Fam118b
2900026A02Rik	1.24	0.88	1.28	0.2533	0.8359	2900026A02Rik
Csrp2bp	4.64	4.28	1.28	0.1517	0.8359	Csrp2bp
Gatsl3	0.5	0.14	1.28	0.1825	0.8359	Gatsl3
Fam129b	4.83	4.47	1.28	0.0402	0.8359	Fam129b
2010315B03Rik	2.23	1.87	1.28	0.7499	1	2010315B03Rik
Hilpda	3.24	2.88	1.28	0.5855	0.97	Hilpda
Trem2	5.12	4.76	1.28	0.1737	0.8359	Trem2
Osbpl5	4.76	4.4	1.28	0.4283	0.8651	Osbpl5
Zfp408	4.97	4.61	1.28	0.1389	0.8359	Zfp408
Daam2	1.85	1.49	1.28	0.9007	1	Daam2
Tbc1d2b	5.77	5.41	1.28	0.0088	0.8359	Tbc1d2b
Mlxipl	0.59	0.23	1.28	0.4786	0.9011	Mlxipl
Paqr9	1.6	1.24	1.28	0.2153	0.8359	Paqr9
Smg5	4.71	4.35	1.28	0.4446	0.8762	Smg5
Piezo2	3.75	3.39	1.28	0.3261	0.8509	Piezo2
Dscr3	1.67	1.32	1.28	0.5247	0.9318	Dscr3
Eno3	1.25	0.89	1.28	0.2681	0.8359	Eno3
Cmpk2	4.35	3.99	1.28	0.0715	0.8359	Cmpk2
Ptchd2	4.81	4.45	1.28	0.1005	0.8359	Ptchd2
Def6	0.78	0.42	1.28	0.3341	0.8573	Def6
Irf1	1.53	1.17	1.28	0.4994	0.9174	Irf1
Cyp3a13	0.59	0.23	1.28	0.2415	0.8359	Cyp3a13
Smad1	6.23	5.87	1.28	0.0797	0.8359	Smad1
Galnt14	0.91	0.55	1.28	0.1036	0.8359	Galnt14
Rtn1	7.71	7.36	1.28	0.1059	0.8359	Rtn1
Gm31145	1.05	0.69	1.28	0.4519	0.882	Gm31145
Dedd	3.73	3.38	1.28	0.1753	0.8359	Dedd
Hint2	4.42	4.07	1.28	0.0284	0.8359	Hint2
Glb1l	3.4	3.05	1.28	0.3129	0.8364	Glb1l
Sec14l1	2.2	1.84	1.28	0.8188	1	Sec14l1
March4	2.66	2.3	1.28	0.2843	0.8359	March4
Kxd1	3.15	2.79	1.28	0.2297	0.8359	Kxd1
Ikbkap	4.06	3.7	1.28	0.6055	0.9831	Ikbkap
Psmd4	6.34	5.99	1.28	0.0235	0.8359	Psmd4
Gm4755	0.53	0.17	1.28	0.0724	0.8359	Gm4755
Rbm26	5.6	5.24	1.28	0.2851	0.8359	Rbm26
Dnd1	1.51	1.16	1.28	0.0756	0.8359	Dnd1
Sfxn1	2.48	2.12	1.28	0.7413	1	Sfxn1
Wdr24	6.86	6.51	1.28	0.2504	0.8359	Wdr24
Zic3	1.39	1.03	1.28	0.1955	0.8359	Zic3
Cenpv	5.14	4.78	1.28	0.2181	0.8359	Cenpv
Adcy3	4.77	4.41	1.28	0.0456	0.8359	Adcy3
Exo1	1.8	1.45	1.28	0.3678	0.8589	Exo1
Gm38434	0.96	0.61	1.28	0.4975	0.9155	Gm38434
Clip3	8.94	8.58	1.28	0.1525	0.8359	Clip3
Abcc10	2.25	1.89	1.28	0.3231	0.8473	Abcc10
Lrrn1	4.92	4.57	1.28	0.2665	0.8359	Lrrn1
E2f8	3.01	2.66	1.28	0.7565	1	E2f8
Slu7	3.89	3.53	1.28	0.458	0.8856	Slu7
0610009L18Rik	0.71	0.35	1.28	0.015	0.8359	0610009L18Rik
Cox11	2.13	1.77	1.28	0.3882	0.8589	Cox11
Cyp2t4	1.21	0.85	1.28	0.9058	1	Cyp2t4
Plcd1	2.31	1.96	1.28	0.1891	0.8359	Plcd1
Bag5	1.86	1.51	1.28	0.0356	0.8359	Bag5
Fbn2	1.76	1.41	1.28	0.3318	0.8562	Fbn2
Pomt2	4.67	4.31	1.28	0.0068	0.8359	Pomt2
4930452G13Rik	0.59	0.24	1.28	0.0508	0.8359	4930452G13Rik
Coro2b	5.52	5.16	1.28	0.1107	0.8359	Coro2b
Dlx1	8.51	8.16	1.28	0.0702	0.8359	Dlx1
Wscd1	8.15	7.8	1.28	0.0379	0.8359	Wscd1
Ccl2	0.87	0.51	1.28	0.3057	0.8359	Ccl2
Lasp1	5.7	5.35	1.28	0.0991	0.8359	Lasp1
Homer3	5.38	5.03	1.28	0.1372	0.8359	Homer3
4930539J05Rik	0.92	0.57	1.28	0.2147	0.8359	4930539J05Rik
Atp2b4	6.22	5.87	1.28	0.1421	0.8359	Atp2b4
Elk1	5.6	5.25	1.27	0.0768	0.8359	Elk1
Mtrf1l	1.77	1.42	1.27	0.2968	0.8359	Mtrf1l
Lta	0.73	0.38	1.27	0.202	0.8359	Lta
Fli1	0.93	0.58	1.27	0.2302	0.8359	Fli1
Lyplal1	1.43	1.08	1.27	0.289	0.8359	Lyplal1
Mmp17	7.53	7.18	1.27	0.0308	0.8359	Mmp17
Gm35340	1.18	0.83	1.27	0.1801	0.8359	Gm35340
2700081O15Rik	6.96	6.61	1.27	0.0294	0.8359	2700081O15Rik
Ovgp1	2.9	2.55	1.27	0.2776	0.8359	Ovgp1
Emx2	1.3	0.95	1.27	0.8285	1	Emx2
Pcx	4.81	4.47	1.27	0.0262	0.8359	Pcx
1700016A09Rik	2.8	2.45	1.27	0.188	0.8359	1700016A09Rik
Sugp2	5.11	4.76	1.27	0.6546	1	Sugp2
Reln	2.12	1.77	1.27	0.3365	0.8589	Reln
Fbxo41	3.12	2.77	1.27	0.247	0.8359	Fbxo41
Gpr137c	2.27	1.92	1.27	0.521	0.9294	Gpr137c
Mkrn2	4.82	4.47	1.27	0.1091	0.8359	Mkrn2
Tmem110	2.43	2.08	1.27	0.424	0.8615	Tmem110
Csrp1	6.1	5.76	1.27	0.0532	0.8359	Csrp1
LOC105245783	0.88	0.53	1.27	0.6195	0.9893	LOC105245783
Gm11734	2.05	1.71	1.27	0.0651	0.8359	Gm11734
Ski	6.06	5.72	1.27	0.1315	0.8359	Ski
2410016O06Rik	1.27	0.93	1.27	0.6319	0.9962	2410016O06Rik
Wdr90	2.71	2.37	1.27	0.2325	0.8359	Wdr90
Cnnm4	2.64	2.29	1.27	0.0376	0.8359	Cnnm4
Serpina3h	0.76	0.41	1.27	0.5218	0.9295	Serpina3h
1700001O22Rik	4.32	3.97	1.27	0.1146	0.8359	1700001O22Rik
Tmem143	3.58	3.23	1.27	0.1174	0.8359	Tmem143
Cdh23	2.69	2.34	1.27	0.3135	0.8369	Cdh23
Ubfd1	0.57	0.23	1.27	0.2605	0.8359	Ubfd1
Aftph	2.89	2.54	1.27	0.3045	0.8359	Aftph
Abcc8	0.42	0.07	1.27	0.4131	0.8589	Abcc8
Mrpl41	2.61	2.26	1.27	0.1106	0.8359	Mrpl41
Gfra2	3.38	3.03	1.27	0.0171	0.8359	Gfra2
Gm10785	0.49	0.15	1.27	0.2429	0.8359	Gm10785
Epha1	1.99	1.64	1.27	0.1612	0.8359	Epha1
Dclre1b	3.75	3.4	1.27	0.2517	0.8359	Dclre1b
Fgf11	3.75	3.4	1.27	0.208	0.8359	Fgf11
Lacc1	1.25	0.91	1.27	0.0313	0.8359	Lacc1
Ctdnep1	4.64	4.3	1.27	0.1446	0.8359	Ctdnep1
Nfatc2ip	0.94	0.6	1.27	0.3484	0.8589	Nfatc2ip
Scrt2	0.67	0.33	1.27	0.3181	0.8424	Scrt2
Slc2a13	5.19	4.85	1.27	0.0295	0.8359	Slc2a13
Gm13570	1.84	1.5	1.27	0.7126	1	Gm13570
Tenm4	6.28	5.94	1.27	0.0044	0.8359	Tenm4
Celf4	7.02	6.67	1.27	0.0815	0.8359	Celf4
Dennd1c	0.59	0.25	1.27	0.318	0.8422	Dennd1c
Wdr62	2.27	1.93	1.27	0.2868	0.8359	Wdr62
Wdr54	3.43	3.09	1.27	0.0089	0.8359	Wdr54
C8g	1	0.66	1.27	0.3584	0.8589	C8g
Faf1	2.14	1.8	1.27	0.161	0.8359	Faf1
Elp5	6.3	5.95	1.27	0.0416	0.8359	Elp5
Slc12a7	3.69	3.34	1.27	0.1642	0.8359	Slc12a7
Bambi-ps1	3.7	3.35	1.27	0.0302	0.8359	Bambi-ps1
Dact3	7.59	7.25	1.27	0.0037	0.8359	Dact3
4933439C10Rik	2.86	2.51	1.27	0.3945	0.8589	4933439C10Rik
Tstd3	0.73	0.38	1.27	0.0943	0.8359	Tstd3
Lrrc28	4.76	4.41	1.27	0.1529	0.8359	Lrrc28
Dhx34	3.07	2.73	1.27	0.2833	0.8359	Dhx34
Tmem196	2.58	2.24	1.27	0.3062	0.8359	Tmem196
Adamts7	4.86	4.52	1.27	0.0714	0.8359	Adamts7
Polr2m	0.63	0.29	1.27	0.0685	0.8359	Polr2m
Gm10266	1.34	1	1.27	0.1176	0.8359	Gm10266
Lgals4	0.68	0.34	1.27	0.08	0.8359	Lgals4
Umps	3.34	3	1.27	0.2696	0.8359	Umps
Smarcd2	3.58	3.24	1.27	0.2524	0.8359	Smarcd2
Ube2a	1.99	1.65	1.27	0.8922	1	Ube2a
1110020A21Rik	0.49	0.15	1.27	0.3802	0.8589	1110020A21Rik
Zfp804a	0.43	0.09	1.27	0.0086	0.8359	Zfp804a
Pcdh9	5.06	4.72	1.27	0.0024	0.8359	Pcdh9
Atg9a	1.47	1.13	1.27	0.5129	0.9235	Atg9a
Tspan13	2.89	2.55	1.27	0.8052	1	Tspan13
Nr6a1	1.48	1.14	1.26	0.608	0.9843	Nr6a1
Wwtr1	1.53	1.19	1.26	0.1543	0.8359	Wwtr1
Wfdc12	0.73	0.39	1.26	0.8337	1	Wfdc12
Pogz	3.35	3.01	1.26	0.4882	0.9081	Pogz
BC068281	2.22	1.89	1.26	0.3766	0.8589	BC068281
Prokr2	7.19	6.85	1.26	0.0534	0.8359	Prokr2
Cacnb3	7.67	7.33	1.26	0.0032	0.8359	Cacnb3
Gm32135	0.41	0.07	1.26	0.1427	0.8359	Gm32135
Zfp94	1.62	1.28	1.26	0.398	0.8589	Zfp94
Mfap2	6.8	6.47	1.26	0.1593	0.8359	Mfap2
Cnr1	3.26	2.92	1.26	0.284	0.8359	Cnr1
Exosc1	3.43	3.09	1.26	0.1974	0.8359	Exosc1
Ispd	2.17	1.84	1.26	0.1292	0.8359	Ispd
Neu1	6.04	5.7	1.26	0.0456	0.8359	Neu1
Spin2c	3.06	2.72	1.26	0.1476	0.8359	Spin2c
Dusp23	4.25	3.91	1.26	0.0522	0.8359	Dusp23
Tpcn1	6.71	6.38	1.26	0.0416	0.8359	Tpcn1
Wnt7a	6.28	5.95	1.26	0.0738	0.8359	Wnt7a
Armcx6	2.5	2.16	1.26	0.1432	0.8359	Armcx6
Rabep2	5.88	5.54	1.26	0.0641	0.8359	Rabep2
Pygb	3.33	2.99	1.26	0.3456	0.8589	Pygb
Wdfy4	2.21	1.87	1.26	0.3392	0.8589	Wdfy4
Fam166b	1.02	0.68	1.26	0.1488	0.8359	Fam166b
Atg10	1.99	1.65	1.26	0.2173	0.8359	Atg10
Lrp1	8.95	8.62	1.26	0.0292	0.8359	Lrp1
Polm	1.9	1.57	1.26	0.1437	0.8359	Polm
Utrn	0.43	0.1	1.26	0.3325	0.8568	Utrn
Greb1	0.53	0.19	1.26	0.1668	0.8359	Greb1
Zfp423	5.7	5.37	1.26	0.0623	0.8359	Zfp423
Nrbp2	5.94	5.6	1.26	0.1802	0.8359	Nrbp2
Stra6l	3.27	2.94	1.26	0.073	0.8359	Stra6l
Gemin2	2.64	2.31	1.26	0.5058	0.92	Gemin2
Nadsyn1	5.42	5.08	1.26	0.3638	0.8589	Nadsyn1
Rfx3	4.5	4.16	1.26	0.1122	0.8359	Rfx3
Ccdc130	3.14	2.8	1.26	0.2669	0.8359	Ccdc130
Ninj2	1.95	1.62	1.26	0.349	0.8589	Ninj2
Cib1	3.81	3.48	1.26	0.0485	0.8359	Cib1
Snx13	2.61	2.27	1.26	0.7364	1	Snx13
Slc38a6	3.34	3.01	1.26	0.0762	0.8359	Slc38a6
Gm26710	0.62	0.28	1.26	0.0595	0.8359	Gm26710
Trp53i11	5.55	5.22	1.26	0.069	0.8359	Trp53i11
Frmpd4	0.93	0.6	1.26	0.0488	0.8359	Frmpd4
Gm40826	0.6	0.27	1.26	0.1162	0.8359	Gm40826
LOC102640250	0.6	0.27	1.26	0.5763	0.9653	LOC102640250
Ccp110	2.92	2.59	1.26	0.9508	1	Ccp110
Hcn2	2.37	2.04	1.26	0.135	0.8359	Hcn2
Plce1	0.69	0.35	1.26	0.3454	0.8589	Plce1
Sde2	4.76	4.43	1.26	0.4401	0.8732	Sde2
Dexi	5.7	5.37	1.26	0.0117	0.8359	Dexi
Cela1	0.81	0.48	1.26	0.2609	0.8359	Cela1
Gm9920	0.6	0.27	1.26	0.3315	0.8559	Gm9920
Sall3	6.61	6.28	1.26	0.0128	0.8359	Sall3
Npepl1	6.03	5.7	1.26	0.0264	0.8359	Npepl1
Rfx2	5	4.67	1.26	0.7083	1	Rfx2
Exoc4	4.23	3.9	1.26	0.1434	0.8359	Exoc4
Unk	6.58	6.25	1.26	0.25	0.8359	Unk
Mcm10	2.66	2.33	1.26	0.0797	0.8359	Mcm10
Vps51	6.36	6.02	1.26	0.025	0.8359	Vps51
Ccdc9	6.34	6.01	1.26	0.0401	0.8359	Ccdc9
Socs2	0.41	0.08	1.26	0.3226	0.847	Socs2
Zdhhc18	3.94	3.61	1.26	0.1453	0.8359	Zdhhc18
LOC108168696	1.07	0.74	1.26	0.6675	1	LOC108168696
Pcgf5	0.75	0.42	1.26	0.6557	1	Pcgf5
St8sia2	6.72	6.39	1.26	0.0278	0.8359	St8sia2
Hcn4	3.33	3	1.26	0.1067	0.8359	Hcn4
Ctbp2	4.85	4.52	1.26	0.3765	0.8589	Ctbp2
Zbtb45	5.09	4.76	1.26	0.0051	0.8359	Zbtb45
Abcd4	2.72	2.39	1.26	0.1474	0.8359	Abcd4
Med28	2.58	2.25	1.26	0.3026	0.8359	Med28
Cdk16	5.07	4.74	1.26	0.1539	0.8359	Cdk16
Vps18	6.49	6.16	1.26	0.042	0.8359	Vps18
Platr10	0.74	0.41	1.26	0.5665	0.9581	Platr10
2810410L24Rik	4.17	3.84	1.26	0.2432	0.8359	2810410L24Rik
Diras2	1.51	1.18	1.26	0.442	0.8747	Diras2
Prickle2	2.36	2.03	1.26	0.467	0.893	Prickle2
Qtrt1	4.71	4.38	1.26	0.1492	0.8359	Qtrt1
Rps6ka1	1.67	1.34	1.26	0.2896	0.8359	Rps6ka1
Ppp2r2c	4.83	4.5	1.26	0.0176	0.8359	Ppp2r2c
Sgms1	3.36	3.03	1.26	0.0007	0.8359	Sgms1
Gltscr1l	4.53	4.2	1.26	0.0704	0.8359	Gltscr1l
Rasgrp3	1.4	1.07	1.26	0.8989	1	Rasgrp3
Colgalt2	2.93	2.61	1.26	0.5219	0.9295	Colgalt2
Gm39939	0.64	0.31	1.26	0.2126	0.8359	Gm39939
Rftn1	0.42	0.1	1.26	0.1289	0.8359	Rftn1
Nod2	1.2	0.87	1.26	0.5822	0.9682	Nod2
Dpep2	1.67	1.34	1.26	0.3799	0.8589	Dpep2
Nkain2	3.06	2.73	1.26	0.1326	0.8359	Nkain2
Sesn2	6.18	5.85	1.26	0.002	0.8359	Sesn2
St8sia1	4.13	3.8	1.26	0.1385	0.8359	St8sia1
Usp40	4.94	4.61	1.26	0.018	0.8359	Usp40
Fat4	3	2.67	1.25	0.2071	0.8359	Fat4
Fbxo9	3.3	2.97	1.25	0.2494	0.8359	Fbxo9
Trim65	2.58	2.25	1.25	0.1546	0.8359	Trim65
BC029722	3.61	3.28	1.25	0.6338	0.997	BC029722
Fam207a	6.48	6.15	1.25	0.086	0.8359	Fam207a
Chchd6	4.15	3.82	1.25	0.2165	0.8359	Chchd6
Six3	2.9	2.57	1.25	0.3333	0.8573	Six3
Ccdc174	1.84	1.52	1.25	0.4506	0.8815	Ccdc174
Hyal3	2.18	1.85	1.25	0.4848	0.9051	Hyal3
P2rx7	3.9	3.57	1.25	0.1002	0.8359	P2rx7
Prickle3	1	0.68	1.25	0.4594	0.8866	Prickle3
Megf8	8.54	8.22	1.25	0.0699	0.8359	Megf8
Hdac5	7.3	6.98	1.25	0.0876	0.8359	Hdac5
9930104L06Rik	4.07	3.74	1.25	0.1243	0.8359	9930104L06Rik
Med12	8.72	8.39	1.25	0.0139	0.8359	Med12
Brwd1	3.59	3.27	1.25	0.1486	0.8359	Brwd1
Apbb3	5.18	4.85	1.25	0.2334	0.8359	Apbb3
Tead4	0.37	0.04	1.25	0.7723	1	Tead4
Mvp	0.67	0.35	1.25	0.0313	0.8359	Mvp
Tekt2	3.92	3.59	1.25	0.0008	0.8359	Tekt2
Plekhf2	3.52	3.2	1.25	0.1054	0.8359	Plekhf2
Arrdc4	4.04	3.72	1.25	0.2217	0.8359	Arrdc4
G430095P16Rik	1.32	1	1.25	0.3945	0.8589	G430095P16Rik
Gbp7	0.34	0.02	1.25	0.0034	0.8359	Gbp7
Lrp3	5.67	5.35	1.25	0.0468	0.8359	Lrp3
Eva1c	0.69	0.37	1.25	0.0859	0.8359	Eva1c
Asun	2.18	1.85	1.25	0.2732	0.8359	Asun
Tmem63c	1.64	1.32	1.25	0.0478	0.8359	Tmem63c
Olfm2	7.98	7.66	1.25	0.0578	0.8359	Olfm2
Gpr61	0.63	0.31	1.25	0.1087	0.8359	Gpr61
Hmga2	0.93	0.61	1.25	0.717	1	Hmga2
Nol3	5.03	4.71	1.25	0.0342	0.8359	Nol3
Tmem165	4.53	4.21	1.25	0.065	0.8359	Tmem165
Psmd5	2.71	2.39	1.25	0.878	1	Psmd5
Sorbs2	5.47	5.14	1.25	0.4978	0.9158	Sorbs2
Brpf1	6.9	6.58	1.25	0.0969	0.8359	Brpf1
Lag3	2.54	2.22	1.25	0.19	0.8359	Lag3
Pcsk7	5.32	5	1.25	0.0872	0.8359	Pcsk7
Ppt1	2.73	2.41	1.25	0.7492	1	Ppt1
Mn1	5.18	4.86	1.25	0.0332	0.8359	Mn1
4632427E13Rik	2.08	1.76	1.25	0.6214	0.9904	4632427E13Rik
Grm8	2.73	2.41	1.25	0.0182	0.8359	Grm8
Shank2	4.78	4.46	1.25	0.0839	0.8359	Shank2
Rhoj	1.81	1.49	1.25	0.4957	0.9142	Rhoj
Hspg2	5.18	4.86	1.25	0.1472	0.8359	Hspg2
Srrm4	5.29	4.97	1.25	0.1481	0.8359	Srrm4
Gpatch2	2.75	2.43	1.25	0.1032	0.8359	Gpatch2
Inpp5d	0.41	0.09	1.25	0.1374	0.8359	Inpp5d
AI837181	5.58	5.26	1.25	0.0084	0.8359	AI837181
Smarca2	1.67	1.35	1.25	0.0595	0.8359	Smarca2
Lfng	3.07	2.75	1.25	0.1796	0.8359	Lfng
Zfp799	4.09	3.77	1.25	0.4735	0.8976	Zfp799
Acp5	1.7	1.38	1.25	0.3222	0.8461	Acp5
Fbxl3	5.33	5.01	1.25	0.0333	0.8359	Fbxl3
F2rl3	0.36	0.04	1.25	0.0615	0.8359	F2rl3
Gm9903	0.8	0.48	1.25	0.1568	0.8359	Gm9903
1700094D03Rik	3.95	3.63	1.25	0.3491	0.8589	1700094D03Rik
1700019B03Rik	0.6	0.28	1.25	0.2888	0.8359	1700019B03Rik
Vps26b	6.58	6.26	1.25	0.0663	0.8359	Vps26b
Clk2-scamp3	5.65	5.33	1.25	0.5691	0.9598	Clk2-scamp3
Fgd3	4.31	3.99	1.25	0.2016	0.8359	Fgd3
Gdpd5	4.95	4.63	1.25	0.0474	0.8359	Gdpd5
Lamb1	1.15	0.83	1.25	0.0145	0.8359	Lamb1
Rhov	1.19	0.87	1.25	0.2758	0.8359	Rhov
Kcnk10	5.61	5.29	1.25	0.4648	0.8907	Kcnk10
Zfp68	5.06	4.75	1.25	0.0366	0.8359	Zfp68
4933421O10Rik	0.98	0.66	1.25	0.0424	0.8359	4933421O10Rik
2810006K23Rik	3.4	3.08	1.25	0.1316	0.8359	2810006K23Rik
1700056E22Rik	0.79	0.47	1.25	0.8315	1	1700056E22Rik
Mmab	7.39	7.07	1.25	0.0926	0.8359	Mmab
Sat1	2.77	2.45	1.25	0.5074	0.9205	Sat1
Uqcr10	2.63	2.32	1.25	0.4947	0.9136	Uqcr10
Kank2	4.95	4.63	1.25	0.0724	0.8359	Kank2
Tmem106c	3.2	2.88	1.25	0.4747	0.8981	Tmem106c
Nlrx1	2.64	2.33	1.25	0.1193	0.8359	Nlrx1
Bspry	0.73	0.42	1.25	0.1756	0.8359	Bspry
Lgi3	7.93	7.61	1.25	0.2205	0.8359	Lgi3
LOC105246062	1.59	1.28	1.25	0.1964	0.8359	LOC105246062
Hspa13	0.81	0.49	1.25	0.5173	0.9264	Hspa13
Dbil5	0.6	0.28	1.25	0.3055	0.8359	Dbil5
Vdr	0.55	0.23	1.25	0.3858	0.8589	Vdr
Lrrfip1	7.17	6.85	1.25	0.0717	0.8359	Lrrfip1
Add2	7.29	6.98	1.25	0.0608	0.8359	Add2
Creb3	4.92	4.6	1.25	0.2478	0.8359	Creb3
Scn3b	2.5	2.18	1.25	0.2065	0.8359	Scn3b
Htatip2	1.28	0.97	1.25	0.2925	0.8359	Htatip2
Efcab7	2.55	2.23	1.25	0.9747	1	Efcab7
Gm29797	0.54	0.22	1.25	0.0974	0.8359	Gm29797
Efcc1	0.61	0.29	1.24	0.1185	0.8359	Efcc1
Ipmk	5.75	5.43	1.24	0.2358	0.8359	Ipmk
Zfp943	0.91	0.6	1.24	0.785	1	Zfp943
Scg2	0.63	0.32	1.24	0.1502	0.8359	Scg2
Spns2	7.92	7.6	1.24	0.1268	0.8359	Spns2
Ubr4	7.65	7.33	1.24	0.1994	0.8359	Ubr4
Epha3	0.77	0.46	1.24	0.9833	1	Epha3
Rnpc3	3.51	3.19	1.24	0.3461	0.8589	Rnpc3
Gm19327	0.36	0.05	1.24	0.3056	0.8359	Gm19327
Slc25a39	6.67	6.36	1.24	0.03	0.8359	Slc25a39
Pdxp	7.76	7.45	1.24	0.08	0.8359	Pdxp
Palm3	0.66	0.34	1.24	0.4519	0.882	Palm3
Creg1	1.21	0.9	1.24	0.0502	0.8359	Creg1
Fam19a5	6.9	6.59	1.24	0.0472	0.8359	Fam19a5
Tfip11	3.78	3.47	1.24	0.2329	0.8359	Tfip11
Agap2	7.46	7.15	1.24	0.0186	0.8359	Agap2
Rdh5	0.97	0.66	1.24	0.6773	1	Rdh5
Stx6	5.56	5.24	1.24	0.0967	0.8359	Stx6
1700125H20Rik	0.38	0.07	1.24	0.7843	1	1700125H20Rik
Csnk1g1	5.39	5.08	1.24	0.0817	0.8359	Csnk1g1
Tmem179b	4.1	3.79	1.24	0.154	0.8359	Tmem179b
Tpd52l1	1	0.68	1.24	0.6872	1	Tpd52l1
Yipf2	5.27	4.95	1.24	0.2688	0.8359	Yipf2
Timp1	0.89	0.58	1.24	0.3674	0.8589	Timp1
Sparcl1	6.35	6.03	1.24	0.1836	0.8359	Sparcl1
Fam167a	2.32	2.01	1.24	0.1344	0.8359	Fam167a
Nsfl1c	3.86	3.55	1.24	0.1462	0.8359	Nsfl1c
Apitd1	0.54	0.23	1.24	0.346	0.8589	Apitd1
Ppm1l	6.68	6.37	1.24	0.145	0.8359	Ppm1l
Sync	1	0.69	1.24	0.4038	0.8589	Sync
Insig1	6.28	5.97	1.24	0.2971	0.8359	Insig1
E430025E21Rik	7.3	6.99	1.24	0.0803	0.8359	E430025E21Rik
Slc37a4	4.23	3.92	1.24	0.0593	0.8359	Slc37a4
Adrbk1	6.69	6.38	1.24	0.0549	0.8359	Adrbk1
Gucy1b2	0.74	0.42	1.24	0.0878	0.8359	Gucy1b2
Zbtb14	3.83	3.52	1.24	0.3666	0.8589	Zbtb14
Foxo3	5.03	4.72	1.24	0.3045	0.8359	Foxo3
Fxyd2	2.75	2.44	1.24	0.1012	0.8359	Fxyd2
Dhrs4	3.31	3	1.24	0.3032	0.8359	Dhrs4
Gm31166	3.17	2.86	1.24	0.1728	0.8359	Gm31166
Anks3	3.17	2.86	1.24	0.8059	1	Anks3
Fam134a	5.63	5.32	1.24	0.2073	0.8359	Fam134a
Alox5ap	0.44	0.13	1.24	0.2659	0.8359	Alox5ap
Fxyd7	2.16	1.85	1.24	0.4292	0.8656	Fxyd7
Ppfia4	0.54	0.23	1.24	0.2206	0.8359	Ppfia4
Ksr2	3.51	3.2	1.24	0.1851	0.8359	Ksr2
Oat	3.69	3.38	1.24	0.0743	0.8359	Oat
Slc24a2	0.93	0.62	1.24	0.7954	1	Slc24a2
Cldn14	0.69	0.38	1.24	0.2886	0.8359	Cldn14
Zfp239	0.53	0.22	1.24	0.1886	0.8359	Zfp239
Ribc1	1.05	0.74	1.24	0.9467	1	Ribc1
Olfr1324	0.31	0	1.24	0.006	0.8359	Olfr1324
1110065P20Rik	5.79	5.48	1.24	0.0199	0.8359	1110065P20Rik
Ufsp2	3.88	3.57	1.24	0.6019	0.9805	Ufsp2
Frs3	4.62	4.31	1.24	0.2445	0.8359	Frs3
Tert	0.83	0.52	1.24	0.3914	0.8589	Tert
Kcnv1	0.43	0.12	1.24	0.0565	0.8359	Kcnv1
Suv420h2	5.97	5.66	1.24	0.1427	0.8359	Suv420h2
Dbr1	2.85	2.54	1.24	0.5184	0.9274	Dbr1
Nck2	1.35	1.04	1.24	0.5599	0.9542	Nck2
AI987944	1.84	1.53	1.24	0.8215	1	AI987944
Zbtb39	2.21	1.91	1.24	0.0667	0.8359	Zbtb39
Smyd4	1.19	0.88	1.24	0.877	1	Smyd4
Anapc16	5.24	4.93	1.24	0.3261	0.8509	Anapc16
LOC102639013	0.36	0.05	1.24	0.2511	0.8359	LOC102639013
Rps6kc1	1.88	1.57	1.24	0.3358	0.8589	Rps6kc1
LOC105244487	0.91	0.6	1.24	0.2513	0.8359	LOC105244487
Slc16a14	1.81	1.5	1.24	0.3582	0.8589	Slc16a14
Bmp1	4.03	3.72	1.24	0.2965	0.8359	Bmp1
Cradd	1.17	0.86	1.24	0.3231	0.8473	Cradd
Gipr	0.98	0.67	1.24	0.5658	0.9577	Gipr
Csnk1g2	8.4	8.09	1.24	0.1484	0.8359	Csnk1g2
Zfp809	5.17	4.86	1.24	0.0532	0.8359	Zfp809
Il12rb1	0.51	0.2	1.24	0.4892	0.909	Il12rb1
Pgrmc1	6.45	6.14	1.24	0.1021	0.8359	Pgrmc1
Calcoco1	6.36	6.05	1.24	0.0891	0.8359	Calcoco1
Rad51d	3.87	3.56	1.24	0.5783	0.9666	Rad51d
Lrrc47	8.4	8.09	1.24	0.0672	0.8359	Lrrc47
Zfp703	4.93	4.62	1.24	0.0262	0.8359	Zfp703
Odf3b	1.25	0.95	1.24	0.8484	1	Odf3b
Opa3	6.06	5.76	1.24	0.15	0.8359	Opa3
5031439G07Rik	8.26	7.95	1.24	0.0388	0.8359	5031439G07Rik
Zfp358	3.78	3.47	1.24	0.5613	0.9553	Zfp358
1700008O03Rik	1.06	0.76	1.24	0.0163	0.8359	1700008O03Rik
Lhfpl4	4.61	4.3	1.24	0.1739	0.8359	Lhfpl4
Fbxl15	1.57	1.27	1.24	0.9876	1	Fbxl15
Csrp2	2.08	1.77	1.24	0.0258	0.8359	Csrp2
Hecw2	0.65	0.35	1.24	0.3148	0.8383	Hecw2
Clcn1	2.81	2.5	1.24	0.4498	0.8805	Clcn1
Ninj1	5.7	5.39	1.24	0.0512	0.8359	Ninj1
Stac2	3.25	2.94	1.24	0.0498	0.8359	Stac2
Atp1a1	5.3	5	1.23	0.2379	0.8359	Atp1a1
Veph1	0.41	0.11	1.23	0.1916	0.8359	Veph1
Myh14	5.43	5.12	1.23	0.0235	0.8359	Myh14
Pantr2	1.14	0.83	1.23	0.0554	0.8359	Pantr2
Hexim1	2.12	1.82	1.23	0.6822	1	Hexim1
Fscn3	0.38	0.08	1.23	0.0507	0.8359	Fscn3
Top3b	5.9	5.59	1.23	0.0358	0.8359	Top3b
Duox2	0.44	0.14	1.23	0.22	0.8359	Duox2
Arhgap44	2.14	1.84	1.23	0.8878	1	Arhgap44
Zfp362	6.46	6.16	1.23	0.1296	0.8359	Zfp362
Stoml1	5.25	4.95	1.23	0.0029	0.8359	Stoml1
Mafg	2.93	2.63	1.23	0.8189	1	Mafg
Sema3e	1.92	1.62	1.23	0.1839	0.8359	Sema3e
Cyth4	1.51	1.2	1.23	0.4171	0.8589	Cyth4
A330069K06Rik	0.43	0.12	1.23	0.1289	0.8359	A330069K06Rik
Llgl2	0.83	0.53	1.23	0.5413	0.9429	Llgl2
Abca7	4.5	4.2	1.23	0.0304	0.8359	Abca7
Slc44a2	6.59	6.29	1.23	0.199	0.8359	Slc44a2
Kdm4b	5.85	5.55	1.23	0.2109	0.8359	Kdm4b
Zfpm1	2.78	2.48	1.23	0.6016	0.9805	Zfpm1
Nbn	2.83	2.53	1.23	0.8639	1	Nbn
Nomo1	4.59	4.29	1.23	0.5812	0.9676	Nomo1
Rcan3	3.86	3.56	1.23	0.5346	0.9377	Rcan3
Trak2	3.56	3.26	1.23	0.1764	0.8359	Trak2
H13	7.85	7.55	1.23	0.0378	0.8359	H13
Aco2	6.5	6.2	1.23	0.1254	0.8359	Aco2
Lrrc75a	5.26	4.96	1.23	0.3399	0.8589	Lrrc75a
Terf2ip	6.5	6.2	1.23	0.0012	0.8359	Terf2ip
Pacsin3	4.16	3.86	1.23	0.0027	0.8359	Pacsin3
Ggt7	5.23	4.93	1.23	0.221	0.8359	Ggt7
Pcdh1	8.72	8.42	1.23	0.0191	0.8359	Pcdh1
Rinl	0.81	0.51	1.23	0.3913	0.8589	Rinl
2810408A11Rik	1.01	0.71	1.23	0.3948	0.8589	2810408A11Rik
Fanca	3.03	2.73	1.23	0.1369	0.8359	Fanca
Snap91	7.12	6.82	1.23	0.1223	0.8359	Snap91
Caly	0.91	0.61	1.23	0.2298	0.8359	Caly
Scd2	9.33	9.03	1.23	0.2245	0.8359	Scd2
Prima1	6.87	6.57	1.23	0.0367	0.8359	Prima1
Kcnn3	3.25	2.95	1.23	0.1928	0.8359	Kcnn3
Iyd	0.68	0.38	1.23	0.2634	0.8359	Iyd
Eef2kmt	3.06	2.77	1.23	0.2363	0.8359	Eef2kmt
Gbgt1	0.5	0.2	1.23	0.3343	0.8573	Gbgt1
Six5	2.61	2.31	1.23	0.0635	0.8359	Six5
Peg3	7.66	7.36	1.23	0.0547	0.8359	Peg3
Arih2	2.85	2.56	1.23	0.9897	1	Arih2
Smim1	0.72	0.42	1.23	0.2274	0.8359	Smim1
Tspan31	6.01	5.71	1.23	0.2106	0.8359	Tspan31
Mccc1	2.13	1.83	1.23	0.3111	0.8359	Mccc1
Acacb	0.62	0.32	1.23	0.0578	0.8359	Acacb
Zbtb48	1.41	1.12	1.23	0.0835	0.8359	Zbtb48
Zfp641	3.65	3.35	1.23	0.0186	0.8359	Zfp641
Haghl	6.55	6.25	1.23	0.2447	0.8359	Haghl
Mutyh	3.37	3.07	1.23	0.0789	0.8359	Mutyh
Thap1	3.06	2.76	1.23	0.3681	0.8589	Thap1
Olfm1	2.92	2.62	1.23	0.2263	0.8359	Olfm1
Clpb	6.93	6.64	1.23	0.0417	0.8359	Clpb
Cntnap3	0.33	0.04	1.23	0.105	0.8359	Cntnap3
Osbpl10	4.17	3.87	1.23	0.1626	0.8359	Osbpl10
Dll1	7.48	7.18	1.23	0.0039	0.8359	Dll1
Fxn	2.87	2.57	1.23	0.5317	0.9358	Fxn
Mzf1	3.93	3.63	1.23	0.0579	0.8359	Mzf1
Ccdc15	1.36	1.07	1.23	0.8131	1	Ccdc15
Rnf165	4.35	4.05	1.23	0.1858	0.8359	Rnf165
Celf3	5.59	5.3	1.23	0.2644	0.8359	Celf3
Pum1	6.59	6.29	1.23	0.1533	0.8359	Pum1
Atcay	6.35	6.05	1.23	0.3528	0.8589	Atcay
Ampd3	7.43	7.13	1.23	2.11e-05	0.5053	Ampd3
Rbpms	0.77	0.47	1.23	0.2319	0.8359	Rbpms
Sema4f	3.55	3.25	1.23	0.0315	0.8359	Sema4f
Dgcr6	6.46	6.16	1.23	0.038	0.8359	Dgcr6
Fbxw4	5.57	5.28	1.23	0.0504	0.8359	Fbxw4
Myc	3.72	3.43	1.23	0.497	0.9153	Myc
Meg3	7.13	6.84	1.23	0.14	0.8359	Meg3
Frrs1l	3.76	3.46	1.23	0.3049	0.8359	Frrs1l
Mmel1	1.34	1.04	1.23	0.286	0.8359	Mmel1
Dgat2	5.29	4.99	1.23	0.0129	0.8359	Dgat2
Hps4	4.83	4.53	1.23	0.0727	0.8359	Hps4
Henmt1	0.61	0.32	1.23	0.4441	0.8761	Henmt1
Prrg2	2.41	2.11	1.23	0.0905	0.8359	Prrg2
Rab3b	3.67	3.37	1.23	0.7536	1	Rab3b
Celsr2	9.22	8.93	1.23	0.0092	0.8359	Celsr2
Dab2ip	8.38	8.09	1.23	0.0002	0.7562	Dab2ip
Myg1	6.68	6.39	1.23	0.067	0.8359	Myg1
Pfkfb1	1.29	0.99	1.23	0.8714	1	Pfkfb1
Crip3	0.57	0.27	1.23	0.0784	0.8359	Crip3
Sp1	5.82	5.53	1.23	0.0085	0.8359	Sp1
Brat1	5.22	4.92	1.23	0.2423	0.8359	Brat1
Tbc1d7	2.51	2.22	1.23	0.4487	0.8797	Tbc1d7
Gm19554	0.88	0.59	1.23	0.3578	0.8589	Gm19554
St3gal1	1.95	1.65	1.23	0.2345	0.8359	St3gal1
Tmem132d	3.89	3.59	1.23	0.4952	0.9139	Tmem132d
Gadd45g	5.37	5.08	1.23	0.0363	0.8359	Gadd45g
Nt5dc2	7.59	7.3	1.23	0.2422	0.8359	Nt5dc2
Nyap1	3.9	3.61	1.23	0.3176	0.8418	Nyap1
Thsd1	1.03	0.73	1.23	0.8724	1	Thsd1
Sftpc	0.93	0.64	1.23	0.773	1	Sftpc
Ak4	1.84	1.55	1.23	0.3754	0.8589	Ak4
Rab27a	0.46	0.17	1.23	0.4308	0.8667	Rab27a
Apbb1	7.28	6.99	1.23	0.2284	0.8359	Apbb1
Vps11	6.3	6.01	1.23	0.2184	0.8359	Vps11
Ftsj1	2.95	2.65	1.23	0.3572	0.8589	Ftsj1
Epb41l4b	4.53	4.24	1.23	0.2608	0.8359	Epb41l4b
Cc2d1a	5.22	4.93	1.23	0.0388	0.8359	Cc2d1a
Tnfaip6	0.41	0.11	1.23	0.2407	0.8359	Tnfaip6
Unc5b	3.88	3.59	1.23	0.2493	0.8359	Unc5b
Ppp1r8	4.16	3.87	1.23	0.1166	0.8359	Ppp1r8
Pag1	7.26	6.97	1.23	0.0096	0.8359	Pag1
Gigyf1	5.09	4.8	1.23	0.4094	0.8589	Gigyf1
Spn	0.4	0.11	1.23	0.1079	0.8359	Spn
Fam109a	6.73	6.44	1.23	0.0278	0.8359	Fam109a
LOC108167568	0.36	0.06	1.23	0.2052	0.8359	LOC108167568
AY074887	0.53	0.23	1.23	0.1818	0.8359	AY074887
Llgl1	6.23	5.94	1.22	0.1292	0.8359	Llgl1
Nans	4.61	4.32	1.22	0.0747	0.8359	Nans
Chtf18	2.45	2.16	1.22	0.3988	0.8589	Chtf18
Tubgcp5	5.61	5.32	1.22	0.0673	0.8359	Tubgcp5
Cyth1	3.55	3.25	1.22	0.573	0.9631	Cyth1
Lyrm1	1.34	1.05	1.22	0.0119	0.8359	Lyrm1
Rbak	3.31	3.02	1.22	0.0094	0.8359	Rbak
Itm2c	8.42	8.13	1.22	0.0521	0.8359	Itm2c
Prss8	0.49	0.2	1.22	0.2557	0.8359	Prss8
Tmem132a	6.42	6.13	1.22	0.1489	0.8359	Tmem132a
Fads1	10.21	9.92	1.22	0.0233	0.8359	Fads1
Pycr2	3.05	2.76	1.22	0.4166	0.8589	Pycr2
Polr3c	3.66	3.37	1.22	0.266	0.8359	Polr3c
Rasgrp1	0.48	0.19	1.22	0.1015	0.8359	Rasgrp1
Dusp7	6.08	5.79	1.22	0.0387	0.8359	Dusp7
Cel	0.4	0.11	1.22	0.2743	0.8359	Cel
Cenpb	4.23	3.94	1.22	0.0527	0.8359	Cenpb
Tox3	5.85	5.56	1.22	0.2759	0.8359	Tox3
Snn	6.6	6.3	1.22	0.2429	0.8359	Snn
Ankrd54	6.12	5.82	1.22	0.0297	0.8359	Ankrd54
Irf3	3.93	3.64	1.22	0.311	0.8359	Irf3
1810043H04Rik	4.81	4.52	1.22	0.278	0.8359	1810043H04Rik
Sh2d5	4.83	4.54	1.22	0.0186	0.8359	Sh2d5
Nfkbia	6.33	6.04	1.22	0.0146	0.8359	Nfkbia
Mr1	2.24	1.95	1.22	0.5263	0.9329	Mr1
Gmip	1.91	1.62	1.22	0.4355	0.8687	Gmip
Pde4dip	9.42	9.13	1.22	0.0373	0.8359	Pde4dip
Car11	4.91	4.62	1.22	0.0628	0.8359	Car11
Tmem191c	2.98	2.69	1.22	0.2243	0.8359	Tmem191c
Mtx3	3.17	2.88	1.22	0.1206	0.8359	Mtx3
Arhgef1	8.21	7.92	1.22	0.018	0.8359	Arhgef1
Cd274	1.24	0.95	1.22	0.2185	0.8359	Cd274
Plekhf1	1.49	1.2	1.22	0.3894	0.8589	Plekhf1
Tbrg4	6.17	5.88	1.22	0.0243	0.8359	Tbrg4
Ankrd10	6.14	5.85	1.22	0.2031	0.8359	Ankrd10
Amotl1	4.09	3.8	1.22	0.1734	0.8359	Amotl1
Rnf111	6.13	5.84	1.22	0.0355	0.8359	Rnf111
Kdm1b	6.23	5.94	1.22	0.0172	0.8359	Kdm1b
Tmem120b	0.58	0.29	1.22	0.2461	0.8359	Tmem120b
L3mbtl1	0.71	0.42	1.22	0.6787	1	L3mbtl1
Pqbp1	4.65	4.36	1.22	0.3288	0.8531	Pqbp1
Ubald1	7.62	7.33	1.22	0.251	0.8359	Ubald1
Lrrtm3	5.6	5.31	1.22	0.4543	0.883	Lrrtm3
Zfp651	5.17	4.88	1.22	0.1243	0.8359	Zfp651
Nr3c2	0.69	0.4	1.22	0.7282	1	Nr3c2
Zdhhc6	3.94	3.65	1.22	0.6041	0.9817	Zdhhc6
Fancm	3.45	3.16	1.22	0.1793	0.8359	Fancm
Cd300c2	0.29	0	1.22	0.0484	0.8359	Cd300c2
LOC108167611	0.29	0	1.22	0.0484	0.8359	LOC108167611
Ccdc141	0.33	0.04	1.22	0.5808	0.9673	Ccdc141
Slc38a4	0.44	0.15	1.22	0.3244	0.8486	Slc38a4
BC030336	8.17	7.88	1.22	0.751	1	BC030336
Rfx1	4.79	4.51	1.22	0.5744	0.964	Rfx1
A230009B12Rik	0.66	0.37	1.22	0.3643	0.8589	A230009B12Rik
Slc35c1	3.91	3.62	1.22	0.1455	0.8359	Slc35c1
Acp7	0.69	0.4	1.22	0.8449	1	Acp7
Tmem44	2.5	2.22	1.22	0.3368	0.8589	Tmem44
Shroom4	2.27	1.98	1.22	0.0953	0.8359	Shroom4
AU040320	2.85	2.57	1.22	0.0453	0.8359	AU040320
Bckdk	4.81	4.52	1.22	0.1793	0.8359	Bckdk
Cbx7	4.27	3.98	1.22	0.0018	0.8359	Cbx7
Smox	7.38	7.1	1.22	0.094	0.8359	Smox
Prdm9	0.97	0.68	1.22	0.0034	0.8359	Prdm9
Ksr1	8.02	7.73	1.22	0.056	0.8359	Ksr1
C4a	0.9	0.62	1.22	0.7644	1	C4a
Tex29	1.21	0.92	1.22	0.5459	0.946	Tex29
Crtc3	6.9	6.62	1.22	0.2986	0.8359	Crtc3
Uba1y	0.61	0.33	1.22	0.8736	1	Uba1y
Ash1l	5.84	5.56	1.22	0.1299	0.8359	Ash1l
Olfr877	0.25	-0.03	1.22	0.0395	0.8359	Olfr877
Triobp	5.26	4.97	1.22	0.1227	0.8359	Triobp
Slc9a7	2.17	1.88	1.22	0.1828	0.8359	Slc9a7
Zdhhc8	4.75	4.47	1.22	0.1043	0.8359	Zdhhc8
Zscan20	5.23	4.94	1.22	0.0866	0.8359	Zscan20
Zfand2b	2.91	2.63	1.22	0.3957	0.8589	Zfand2b
Thbd	0.91	0.63	1.22	0.728	1	Thbd
Ppp1r9a	6.08	5.8	1.22	0.3486	0.8589	Ppp1r9a
Dnaja3	5.72	5.44	1.22	0.1753	0.8359	Dnaja3
Mpzl3	1.38	1.09	1.22	0.0648	0.8359	Mpzl3
Kctd7	2.66	2.38	1.22	0.3061	0.8359	Kctd7
Sar1a	2.91	2.62	1.22	0.5128	0.9235	Sar1a
Trp53inp2	8.33	8.05	1.22	0.0564	0.8359	Trp53inp2
Usp29	1.5	1.21	1.22	0.8739	1	Usp29
Tmem231	3.41	3.13	1.22	0.2827	0.8359	Tmem231
Gucd1	5.97	5.69	1.22	0.0886	0.8359	Gucd1
Rnf166	2.72	2.43	1.22	0.1447	0.8359	Rnf166
Ddx26b	0.72	0.44	1.22	0.7957	1	Ddx26b
Prr7	0.94	0.66	1.22	0.2995	0.8359	Prr7
Pnrc1	4.3	4.02	1.22	0.2217	0.8359	Pnrc1
Osbpl6	3.51	3.23	1.22	0.3692	0.8589	Osbpl6
Foxm1	3.3	3.02	1.22	0.4027	0.8589	Foxm1
Mtcl1	4.77	4.48	1.22	0.1882	0.8359	Mtcl1
9430016H08Rik	1.91	1.63	1.22	0.2932	0.8359	9430016H08Rik
Gdf11	5.82	5.54	1.22	0.0042	0.8359	Gdf11
Ctps2	3.79	3.51	1.22	0.1616	0.8359	Ctps2
Cyp2d22	1.41	1.13	1.22	0.2441	0.8359	Cyp2d22
Ppp1r15a	5.6	5.32	1.22	0.0007	0.8359	Ppp1r15a
LOC108168707	0.38	0.1	1.22	0.1288	0.8359	LOC108168707
Git1	7.71	7.42	1.22	0.0707	0.8359	Git1
Foxh1	0.62	0.34	1.22	0.2598	0.8359	Foxh1
Tfeb	5.63	5.35	1.22	0.231	0.8359	Tfeb
Jak3	1.09	0.81	1.21	0.2009	0.8359	Jak3
Ube2ql1	3.11	2.83	1.21	0.2901	0.8359	Ube2ql1
2010111I01Rik	4.59	4.31	1.21	0.4002	0.8589	2010111I01Rik
Vcan	10.08	9.8	1.21	0.4703	0.8956	Vcan
Atxn1l	2.77	2.49	1.21	0.5375	0.9397	Atxn1l
Zfp219	6.72	6.44	1.21	0.1007	0.8359	Zfp219
Pecam1	1.11	0.83	1.21	0.4179	0.8589	Pecam1
Fgd6	3.01	2.72	1.21	0.3146	0.838	Fgd6
Timm13	6.91	6.63	1.21	0.2186	0.8359	Timm13
Neurl1a	2.6	2.32	1.21	0.1697	0.8359	Neurl1a
Setd1a	2.6	2.32	1.21	0.2667	0.8359	Setd1a
Lonrf2	5.78	5.5	1.21	0.1146	0.8359	Lonrf2
Tlr13	0.5	0.22	1.21	0.6161	0.9871	Tlr13
Tmem178b	7.02	6.75	1.21	0.0021	0.8359	Tmem178b
Fosl2	5.06	4.78	1.21	0.2149	0.8359	Fosl2
Ids	7.47	7.19	1.21	0.1659	0.8359	Ids
Akap13	5.18	4.9	1.21	0.1614	0.8359	Akap13
Gtf3c5	2.64	2.36	1.21	0.3995	0.8589	Gtf3c5
Fntb	5.08	4.8	1.21	0.1687	0.8359	Fntb
Crip1	1.28	1	1.21	0.6777	1	Crip1
Ppfia3	4.65	4.37	1.21	0.0843	0.8359	Ppfia3
Wbscr16	3.17	2.89	1.21	0.4659	0.8918	Wbscr16
Tubgcp2	4.44	4.16	1.21	0.0726	0.8359	Tubgcp2
Otud3	3.79	3.52	1.21	0.1375	0.8359	Otud3
1700020D05Rik	0.98	0.7	1.21	0.3829	0.8589	1700020D05Rik
Matn3	0.67	0.4	1.21	0.979	1	Matn3
LOC108167883	1.3	1.03	1.21	0.1555	0.8359	LOC108167883
Mdm1	1.94	1.66	1.21	0.5058	0.92	Mdm1
Gm12522	0.79	0.51	1.21	0.0338	0.8359	Gm12522
Fahd2a	4.4	4.12	1.21	0.0911	0.8359	Fahd2a
Ulk3	3.38	3.1	1.21	0.2511	0.8359	Ulk3
Plcg1	4.18	3.9	1.21	0.2906	0.8359	Plcg1
Etfa	6.87	6.59	1.21	0.2606	0.8359	Etfa
Tmem39a	3.47	3.19	1.21	0.3029	0.8359	Tmem39a
2810428I15Rik	3.37	3.09	1.21	0.0636	0.8359	2810428I15Rik
Bcl9	8.2	7.92	1.21	0.054	0.8359	Bcl9
Letmd1	5.71	5.43	1.21	0.1616	0.8359	Letmd1
Nom1	5.32	5.04	1.21	0.9655	1	Nom1
Neu3	1.21	0.94	1.21	0.365	0.8589	Neu3
Cmc2	3.71	3.43	1.21	0.5216	0.9294	Cmc2
Skap2	0.59	0.31	1.21	0.3757	0.8589	Skap2
Nagpa	4.79	4.52	1.21	0.2678	0.8359	Nagpa
Fam161a	2.58	2.3	1.21	0.1125	0.8359	Fam161a
Rft1	1.39	1.12	1.21	0.0114	0.8359	Rft1
1700003M07Rik	0.95	0.67	1.21	0.3067	0.8359	1700003M07Rik
Kcnk2	4.88	4.61	1.21	0.2845	0.8359	Kcnk2
Inpp4a	8.62	8.35	1.21	0.0218	0.8359	Inpp4a
Tbc1d24	4.64	4.37	1.21	0.1497	0.8359	Tbc1d24
Plxna3	4.74	4.46	1.21	0.8426	1	Plxna3
Gm26520	0.34	0.07	1.21	0.2074	0.8359	Gm26520
Tyk2	4.76	4.48	1.21	0.0132	0.8359	Tyk2
Tubd1	1.25	0.98	1.21	0.3053	0.8359	Tubd1
Sertad4	3.38	3.1	1.21	0.4587	0.8859	Sertad4
Cep72	2.19	1.91	1.21	0.0101	0.8359	Cep72
Masp1	1.08	0.8	1.21	0.1475	0.8359	Masp1
Polr1c	6.08	5.81	1.21	0.1199	0.8359	Polr1c
Fam83h	2.76	2.48	1.21	0.1728	0.8359	Fam83h
G2e3	3.14	2.87	1.21	0.4188	0.8589	G2e3
AU022793	0.42	0.14	1.21	0.1899	0.8359	AU022793
Ltb4r2	0.24	-0.04	1.21	0.0944	0.8359	Ltb4r2
Ecel1	1.19	0.91	1.21	0.1488	0.8359	Ecel1
Ltbr	0.66	0.38	1.21	0.0285	0.8359	Ltbr
Kcnk7	0.48	0.2	1.21	0.2712	0.8359	Kcnk7
Firre	6.96	6.68	1.21	0.0622	0.8359	Firre
Rims1	2.09	1.81	1.21	0.3001	0.8359	Rims1
Sart3	6.01	5.73	1.21	0.1177	0.8359	Sart3
Fam84a	6.09	5.82	1.21	0.1249	0.8359	Fam84a
Psors1c2	1.21	0.94	1.21	0.4554	0.8836	Psors1c2
Adgrl1	10.3	10.02	1.21	0.134	0.8359	Adgrl1
Trnp1	1.24	0.97	1.21	0.2283	0.8359	Trnp1
1810041L15Rik	1.52	1.24	1.21	0.6197	0.9895	1810041L15Rik
Abi2	9.33	9.06	1.21	0.0664	0.8359	Abi2
Shisa5	5.5	5.22	1.21	0.1098	0.8359	Shisa5
Agtpbp1	4.29	4.02	1.21	0.9469	1	Agtpbp1
Elac1	4.39	4.12	1.21	0.0422	0.8359	Elac1
Slc29a3	4.15	3.88	1.21	0.711	1	Slc29a3
C77080	4.06	3.78	1.21	0.0245	0.8359	C77080
Dnah8	0.99	0.71	1.21	0.2016	0.8359	Dnah8
Zfp93	0.65	0.37	1.21	0.1083	0.8359	Zfp93
Decr1	3.24	2.97	1.21	0.3039	0.8359	Decr1
2610020H08Rik	0.32	0.05	1.21	0.2336	0.8359	2610020H08Rik
Kif7	2.37	2.09	1.21	0.1573	0.8359	Kif7
Timp2	8.47	8.19	1.21	0.5156	0.9253	Timp2
Flywch1	7.75	7.48	1.21	0.0396	0.8359	Flywch1
Frmd8	7.29	7.02	1.21	0.1758	0.8359	Frmd8
Kifc3	4.86	4.59	1.21	0.027	0.8359	Kifc3
Glipr1	0.42	0.14	1.21	0.5823	0.9683	Glipr1
Unkl	6.4	6.12	1.21	0.027	0.8359	Unkl
Sh3bp5l	8.54	8.27	1.21	0.0324	0.8359	Sh3bp5l
Clcn6	9.19	8.92	1.21	0.0059	0.8359	Clcn6
Pfkfb3	3.84	3.57	1.21	0.7638	1	Pfkfb3
Colec12	1.09	0.82	1.21	0.336	0.8589	Colec12
Dclk2	7.19	6.92	1.21	0.1114	0.8359	Dclk2
Dtx3	8.2	7.93	1.21	0.1001	0.8359	Dtx3
E2f4	5.35	5.08	1.21	0.0862	0.8359	E2f4
Eef1a2	3.71	3.44	1.21	0.1923	0.8359	Eef1a2
Smagp	0.72	0.44	1.21	0.2638	0.8359	Smagp
Rasa4	4.95	4.67	1.21	0.2024	0.8359	Rasa4
Zfp786	2.87	2.6	1.21	0.2384	0.8359	Zfp786
Tmem18	3.37	3.1	1.21	0.6694	1	Tmem18
Timeless	1.76	1.49	1.21	0.6903	1	Timeless
Col6a1	3.11	2.84	1.21	0.3852	0.8589	Col6a1
9230110C19Rik	1.68	1.41	1.21	0.0798	0.8359	9230110C19Rik
Irak4	2.35	2.08	1.21	0.5726	0.9626	Irak4
Vcpkmt	2.61	2.34	1.21	0.2077	0.8359	Vcpkmt
Nod1	1.46	1.19	1.21	0.4163	0.8589	Nod1
Tmem206	4.65	4.38	1.21	0.128	0.8359	Tmem206
Garnl3	3.27	3	1.21	0.9132	1	Garnl3
Commd4	7.37	7.1	1.21	0.1731	0.8359	Commd4
Gstm4	1.15	0.88	1.21	0.1331	0.8359	Gstm4
Tctn1	3.22	2.95	1.21	0.4122	0.8589	Tctn1
LOC108169150	0.36	0.09	1.21	0.5405	0.9423	LOC108169150
Rnf144b	4.76	4.49	1.21	0.2555	0.8359	Rnf144b
Tmtc4	1.06	0.78	1.21	0.0013	0.8359	Tmtc4
P2ry1	1.51	1.24	1.21	0.5355	0.9381	P2ry1
Gmpr	5.66	5.39	1.21	0.0409	0.8359	Gmpr
Fbxo10	4.1	3.83	1.21	0.1129	0.8359	Fbxo10
Dnmt3b	1.14	0.87	1.21	0.5345	0.9376	Dnmt3b
Htr6	0.84	0.57	1.21	0.9323	1	Htr6
Pcyox1l	3.65	3.38	1.21	0.2157	0.8359	Pcyox1l
Tmcc2	7.69	7.42	1.21	0.0627	0.8359	Tmcc2
Mov10	2.32	2.06	1.21	0.0446	0.8359	Mov10
Tmem242	5.87	5.6	1.21	0.1128	0.8359	Tmem242
Tet3	7.9	7.63	1.21	0.0213	0.8359	Tet3
Rnf182	3.4	3.13	1.21	0.1881	0.8359	Rnf182
Begain	8.08	7.81	1.21	0.0088	0.8359	Begain
Rps6ka4	2.21	1.94	1.2	0.6214	0.9904	Rps6ka4
Pkdcc	6.02	5.75	1.2	0.092	0.8359	Pkdcc
Chmp7	7.05	6.78	1.2	0.0847	0.8359	Chmp7
Taf6	4.14	3.88	1.2	0.2059	0.8359	Taf6
Gps2	4.83	4.56	1.2	0.0862	0.8359	Gps2
Cops8	4.61	4.34	1.2	0.6876	1	Cops8
Notch1	10.52	10.25	1.2	0.1492	0.8359	Notch1
Gsx1	6.8	6.53	1.2	0.0814	0.8359	Gsx1
Gm40918	0.33	0.06	1.2	0.1057	0.8359	Gm40918
Tmem37	0.47	0.2	1.2	0.0811	0.8359	Tmem37
Gm10069	0.33	0.06	1.2	0.0678	0.8359	Gm10069
Hlcs	4.71	4.44	1.2	0.11	0.8359	Hlcs
Adra2c	1.24	0.97	1.2	0.1034	0.8359	Adra2c
Smad7	4.55	4.28	1.2	0.4513	0.8816	Smad7
Nfe2l1	8.02	7.76	1.2	0.351	0.8589	Nfe2l1
Tmem39b	4.3	4.04	1.2	0.0645	0.8359	Tmem39b
LOC108169068	0.43	0.16	1.2	0.5116	0.9229	LOC108169068
Fem1b	6.13	5.86	1.2	0.3616	0.8589	Fem1b
Tapt1	3.51	3.24	1.2	0.1913	0.8359	Tapt1
Recql5	2.9	2.63	1.2	0.2227	0.8359	Recql5
Syt5	0.98	0.71	1.2	0.9634	1	Syt5
Tmem213	0.38	0.12	1.2	0.6383	1	Tmem213
3110056K07Rik	1.16	0.9	1.2	0.6322	0.9962	3110056K07Rik
6430550D23Rik	0.32	0.06	1.2	0.1485	0.8359	6430550D23Rik
Pbx2	4.05	3.79	1.2	0.2232	0.8359	Pbx2
Frmd4b	3.31	3.04	1.2	0.1708	0.8359	Frmd4b
Ripk3	0.29	0.03	1.2	0.2499	0.8359	Ripk3
Trip10	2.96	2.69	1.2	0.9752	1	Trip10
Kcna1	4.13	3.86	1.2	0.67	1	Kcna1
Arhgap26	2.96	2.7	1.2	0.2785	0.8359	Arhgap26
Pigh	3.24	2.98	1.2	0.6375	0.9999	Pigh
Fam107a	0.27	0.01	1.2	0.1895	0.8359	Fam107a
Ccdc112	0.48	0.21	1.2	0.9739	1	Ccdc112
4930415F15Rik	0.54	0.28	1.2	0.4312	0.8671	4930415F15Rik
Gm33373	0.44	0.18	1.2	0.5049	0.92	Gm33373
Csmd1	3.75	3.48	1.2	0.0783	0.8359	Csmd1
Faap24	2.07	1.8	1.2	0.3089	0.8359	Faap24
Fam134c	5.75	5.49	1.2	0.5056	0.92	Fam134c
Samd4	2.74	2.47	1.2	0.4708	0.8961	Samd4
Gm16010	0.6	0.34	1.2	0.5447	0.9449	Gm16010
Tor3a	1.56	1.29	1.2	0.8	1	Tor3a
Ece2	5.91	5.65	1.2	0.2082	0.8359	Ece2
4930533P14Rik	0.28	0.02	1.2	0.1658	0.8359	4930533P14Rik
Slc41a3	2.68	2.42	1.2	0.3193	0.8429	Slc41a3
Ppan	5.42	5.15	1.2	0.3901	0.8589	Ppan
Chadl	3.94	3.68	1.2	0.4463	0.8775	Chadl
Zfp512b	6.06	5.8	1.2	0.0802	0.8359	Zfp512b
Mycl	7.39	7.12	1.2	0.1396	0.8359	Mycl
Ears2	1.23	0.97	1.2	0.4632	0.8891	Ears2
Zgpat	8.3	8.04	1.2	0.1327	0.8359	Zgpat
Ero1lb	0.37	0.11	1.2	0.049	0.8359	Ero1lb
Clasrp	2.21	1.95	1.2	0.2416	0.8359	Clasrp
Taco1	3.09	2.83	1.2	0.1437	0.8359	Taco1
Pnpla5	0.43	0.16	1.2	0.2181	0.8359	Pnpla5
4930556L07Rik	0.31	0.05	1.2	0.0628	0.8359	4930556L07Rik
Rtfdc1	6.08	5.82	1.2	0.2155	0.8359	Rtfdc1
Serpina3n	4.04	3.77	1.2	0.5986	0.9796	Serpina3n
LOC108167908	0.32	0.06	1.2	0.8904	1	LOC108167908
Tmem176a	4.18	3.91	1.2	0.3737	0.8589	Tmem176a
Ier3	0.53	0.27	1.2	0.3931	0.8589	Ier3
Fndc3b	4.55	4.29	1.2	0.2499	0.8359	Fndc3b
S100a6	0.62	0.36	1.2	0.514	0.9241	S100a6
Tmem179	2.97	2.7	1.2	0.131	0.8359	Tmem179
Nup98	6.96	6.7	1.2	0.0749	0.8359	Nup98
D10Jhu81e	5.22	4.96	1.2	0.1241	0.8359	D10Jhu81e
Kdelc2	2.03	1.77	1.2	0.445	0.8765	Kdelc2
Traf2	3.67	3.41	1.2	0.1061	0.8359	Traf2
Ogfrl1	3.63	3.36	1.2	0.2968	0.8359	Ogfrl1
Rgs19	2.7	2.44	1.2	0.178	0.8359	Rgs19
Zfyve19	4.9	4.64	1.2	0.1951	0.8359	Zfyve19
Alg6	1.53	1.27	1.2	0.4096	0.8589	Alg6
Matn1	2.67	2.4	1.2	0.9234	1	Matn1
Col6a5	0.44	0.18	1.2	0.0114	0.8359	Col6a5
Pgp	7.05	6.79	1.2	0.1285	0.8359	Pgp
Lgals1-ps2	1.91	1.65	1.2	0.3107	0.8359	Lgals1-ps2
Sdc4	1.89	1.63	1.2	0.1841	0.8359	Sdc4
Thsd4	7.04	6.78	1.2	0.0249	0.8359	Thsd4
Actn3	1.54	1.28	1.2	0.1607	0.8359	Actn3
Yipf6	3.44	3.18	1.2	0.519	0.9281	Yipf6
Gk	0.8	0.54	1.2	0.9476	1	Gk
LOC102640359	0.43	0.17	1.2	0.5054	0.92	LOC102640359
Stk11	3.84	3.58	1.2	0.172	0.8359	Stk11
Ramp2	0.69	0.43	1.2	0.585	0.9697	Ramp2
Zfp286	1.19	0.93	1.2	0.7175	1	Zfp286
Leng9	1.92	1.66	1.2	0.0586	0.8359	Leng9
Dock6	6.26	6	1.2	0.3345	0.8573	Dock6
Rsad1	2.62	2.36	1.2	0.3483	0.8589	Rsad1
Capn3	0.31	0.05	1.2	0.1929	0.8359	Capn3
Rnf150	6.22	5.96	1.2	0.084	0.8359	Rnf150
Tlk1	3.59	3.33	1.2	0.0542	0.8359	Tlk1
Inafm1	2.8	2.54	1.2	0.2022	0.8359	Inafm1
E530011L22Rik	3.47	3.21	1.2	0.571	0.9612	E530011L22Rik
Ncln	6.78	6.52	1.2	0.106	0.8359	Ncln
Abca1	7.35	7.09	1.2	0.0764	0.8359	Abca1
5730403I07Rik	0.29	0.03	1.2	0.2177	0.8359	5730403I07Rik
Sapcd2	5.39	5.13	1.2	0.0889	0.8359	Sapcd2
Manea	2.7	2.44	1.2	0.9796	1	Manea
Hs3st5	1.81	1.55	1.2	0.2149	0.8359	Hs3st5
Zfp335	5.51	5.25	1.2	0.1055	0.8359	Zfp335
Arrdc3	5.82	5.56	1.2	0.0509	0.8359	Arrdc3
Mlxip	5.17	4.91	1.2	0.6221	0.9904	Mlxip
Lhx2	6.78	6.52	1.2	0.2366	0.8359	Lhx2
Ereg	0.51	0.25	1.2	0.2338	0.8359	Ereg
Zc3h18	3.53	3.27	1.2	0.3107	0.8359	Zc3h18
Capg	0.87	0.61	1.2	0.7012	1	Capg
Sox10	11.27	11.01	1.2	0.0758	0.8359	Sox10
Arhgap25	1.63	1.37	1.2	0.2706	0.8359	Arhgap25
Eapp	4.04	3.78	1.2	0.3871	0.8589	Eapp
Slc29a4	5.08	4.82	1.2	0.1739	0.8359	Slc29a4
Zcchc24	7.97	7.71	1.2	0.1661	0.8359	Zcchc24
A430110L20Rik	1.36	1.1	1.2	0.3221	0.8461	A430110L20Rik
Slc36a1	3.15	2.9	1.2	0.3443	0.8589	Slc36a1
Slit1	5.31	5.05	1.2	0.2644	0.8359	Slit1
Vmn1r32	0.25	-0.01	1.2	0.1867	0.8359	Vmn1r32
Slc6a7	0.85	0.59	1.2	0.331	0.8552	Slc6a7
Kndc1	4.42	4.16	1.2	0.1374	0.8359	Kndc1
Zfp710	5.23	4.97	1.2	0.0437	0.8359	Zfp710
Zfyve1	7.59	7.33	1.2	0.0801	0.8359	Zfyve1
Zfyve27	4.82	4.57	1.2	0.0619	0.8359	Zfyve27
Myom2	0.3	0.05	1.2	0.0848	0.8359	Myom2
Gba	4.51	4.25	1.2	0.1332	0.8359	Gba
Hgfac	0.86	0.6	1.2	0.1091	0.8359	Hgfac
9030617O03Rik	2.92	2.67	1.2	0.4501	0.881	9030617O03Rik
Ptpn5	1.93	1.67	1.2	0.5218	0.9295	Ptpn5
Agr2	0.23	-0.03	1.2	0.2144	0.8359	Agr2
Arhgef12	2.61	2.35	1.2	0.4113	0.8589	Arhgef12
Chrne	1.08	0.82	1.2	0.1105	0.8359	Chrne
Pik3cb	4.11	3.86	1.2	0.537	0.9395	Pik3cb
Gm14858	0.73	0.47	1.2	0.232	0.8359	Gm14858
Mvd	9.06	8.8	1.2	0.512	0.9232	Mvd
Sstr4	1.45	1.19	1.2	0.2008	0.8359	Sstr4
Ulk4	2.23	1.97	1.2	0.6192	0.9892	Ulk4
Rbm15b	6.48	6.23	1.2	0.0872	0.8359	Rbm15b
Syne2	2.91	2.65	1.19	0.454	0.883	Syne2
A230001M10Rik	0.83	0.57	1.19	0.9703	1	A230001M10Rik
Aadac	0.3	0.05	1.19	0.0477	0.8359	Aadac
Scd1	10.07	9.81	1.19	0.0494	0.8359	Scd1
Tmem169	5.74	5.48	1.19	0.0157	0.8359	Tmem169
Apba1	6.91	6.65	1.19	0.0659	0.8359	Apba1
Cep85	6.16	5.91	1.19	0.3086	0.8359	Cep85
Rfxank	6.38	6.13	1.19	0.0386	0.8359	Rfxank
Mpped1	4.11	3.85	1.19	0.5323	0.9363	Mpped1
Mtcp1	1.62	1.36	1.19	0.8839	1	Mtcp1
Fads3	2.74	2.48	1.19	0.4391	0.8719	Fads3
Sprr2f	0.45	0.19	1.19	0.2695	0.8359	Sprr2f
Etv6	5.45	5.19	1.19	0.3731	0.8589	Etv6
Camk1	8.36	8.1	1.19	0.155	0.8359	Camk1
Bbc3	3.48	3.23	1.19	0.8624	1	Bbc3
Rhno1	5.91	5.65	1.19	0.0963	0.8359	Rhno1
Nrip2	2.17	1.92	1.19	0.3791	0.8589	Nrip2
Pde8a	0.43	0.17	1.19	0.2303	0.8359	Pde8a
Mthfr	6.82	6.56	1.19	0.1957	0.8359	Mthfr
B230219D22Rik	7.49	7.24	1.19	0.3245	0.8486	B230219D22Rik
Mesp2	3.1	2.84	1.19	0.5201	0.9284	Mesp2
Tbc1d8	2.86	2.61	1.19	0.3052	0.8359	Tbc1d8
Igdcc3	1.85	1.59	1.19	0.2235	0.8359	Igdcc3
Atg2a	8.41	8.16	1.19	0.0032	0.8359	Atg2a
Pelo	3.45	3.2	1.19	0.7634	1	Pelo
Trappc4	4.64	4.39	1.19	0.1054	0.8359	Trappc4
Gsg1l	0.33	0.07	1.19	0.4252	0.8622	Gsg1l
Camk2a	0.62	0.36	1.19	0.2628	0.8359	Camk2a
Porcn	6.58	6.32	1.19	0.0916	0.8359	Porcn
Lrrc16b	5.79	5.53	1.19	0.0645	0.8359	Lrrc16b
Adam11	6.25	6	1.19	0.0801	0.8359	Adam11
Mta2	7.23	6.98	1.19	0.3851	0.8589	Mta2
Gm36584	1.17	0.91	1.19	0.869	1	Gm36584
Gabbr2	4.48	4.22	1.19	0.0725	0.8359	Gabbr2
Cd151	6.27	6.02	1.19	0.0016	0.8359	Cd151
Zfp513	7.98	7.73	1.19	0.0928	0.8359	Zfp513
Tardbp	0.91	0.66	1.19	0.2867	0.8359	Tardbp
Snrpa	6.57	6.32	1.19	0.3046	0.8359	Snrpa
8030462N17Rik	1.86	1.61	1.19	0.1921	0.8359	8030462N17Rik
Upk1a	2.47	2.22	1.19	0.9599	1	Upk1a
Slc25a29	5.44	5.19	1.19	0.0718	0.8359	Slc25a29
Tex30	0.5	0.25	1.19	0.4419	0.8747	Tex30
Ecsit	3.89	3.63	1.19	0.3558	0.8589	Ecsit
Pkd1l1	3.62	3.36	1.19	0.3106	0.8359	Pkd1l1
Zfp553	6.21	5.96	1.19	0.1503	0.8359	Zfp553
Heca	2.01	1.76	1.19	0.7113	1	Heca
Milr1	0.62	0.37	1.19	0.2547	0.8359	Milr1
Atp10b	4.66	4.41	1.19	0.2327	0.8359	Atp10b
2210016F16Rik	2.63	2.38	1.19	0.9254	1	2210016F16Rik
Igsf9	6.51	6.25	1.19	0.0105	0.8359	Igsf9
Adam15	4.07	3.81	1.19	0.1892	0.8359	Adam15
Endov	2.89	2.64	1.19	0.266	0.8359	Endov
Hsf4	0.39	0.14	1.19	0.1587	0.8359	Hsf4
Tmem260	2.62	2.37	1.19	0.2765	0.8359	Tmem260
Sgk2	1.29	1.04	1.19	0.3444	0.8589	Sgk2
Arhgap30	2.31	2.06	1.19	0.2897	0.8359	Arhgap30
Zfp282	7.85	7.6	1.19	0.0675	0.8359	Zfp282
Ddit4	9.84	9.59	1.19	0.2223	0.8359	Ddit4
Nectin4	0.54	0.29	1.19	0.1777	0.8359	Nectin4
Phrf1	4.48	4.23	1.19	0.3101	0.8359	Phrf1
Ptgir	0.24	-0.01	1.19	0.4856	0.9059	Ptgir
Eda2r	4.95	4.7	1.19	0.2693	0.8359	Eda2r
Klk8	1.87	1.61	1.19	0.3357	0.8589	Klk8
Orai1	3.55	3.3	1.19	0.1534	0.8359	Orai1
Gna12	7.93	7.68	1.19	0.2647	0.8359	Gna12
Trak1	6.28	6.03	1.19	0.1694	0.8359	Trak1
Bbs1	5.09	4.84	1.19	0.3418	0.8589	Bbs1
Tysnd1	6.23	5.98	1.19	0.0823	0.8359	Tysnd1
Arhgef17	6.46	6.21	1.19	0.058	0.8359	Arhgef17
Matk	4.59	4.34	1.19	0.0177	0.8359	Matk
Cercam	2.97	2.72	1.19	0.2856	0.8359	Cercam
1110008P14Rik	3.31	3.06	1.19	0.4683	0.8938	1110008P14Rik
C030023E24Rik	0.88	0.63	1.19	0.8906	1	C030023E24Rik
Traf3ip2	0.29	0.04	1.19	0.2142	0.8359	Traf3ip2
AW549877	1.8	1.55	1.19	0.4094	0.8589	AW549877
D2hgdh	6.21	5.96	1.19	0.1215	0.8359	D2hgdh
Josd2	4.56	4.31	1.19	0.2961	0.8359	Josd2
Saraf	4.07	3.82	1.19	0.7713	1	Saraf
Rars2	1.95	1.7	1.19	0.8246	1	Rars2
E130018N17Rik	0.37	0.12	1.19	0.3482	0.8589	E130018N17Rik
Clcn7	4.91	4.66	1.19	0.2232	0.8359	Clcn7
Gchfr	1.44	1.19	1.19	0.2989	0.8359	Gchfr
Cog8	4.88	4.63	1.19	0.2963	0.8359	Cog8
Dhx16	7.58	7.33	1.19	0.1691	0.8359	Dhx16
Zkscan3	6.79	6.54	1.19	0.612	0.9858	Zkscan3
Bola1	1.11	0.86	1.19	0.4789	0.9011	Bola1
Zbtb49	2.31	2.06	1.19	0.3875	0.8589	Zbtb49
Ncoa5	5.04	4.79	1.19	0.4629	0.8889	Ncoa5
Trpv2	1.45	1.2	1.19	0.4127	0.8589	Trpv2
Exoc3l2	0.43	0.18	1.19	0.1834	0.8359	Exoc3l2
Mrpl38	3.9	3.66	1.19	0.0931	0.8359	Mrpl38
Col9a3	4.26	4.01	1.19	0.2022	0.8359	Col9a3
Znrf1	7.57	7.32	1.19	0.1991	0.8359	Znrf1
Chst5	2.26	2.01	1.19	0.6253	0.9917	Chst5
Usp28	3.97	3.72	1.19	0.1611	0.8359	Usp28
Rbck1	7.31	7.07	1.19	0.1064	0.8359	Rbck1
Aars2	4.98	4.73	1.19	0.1562	0.8359	Aars2
Arrdc1	2.98	2.73	1.19	0.0398	0.8359	Arrdc1
Sema3f	4.34	4.09	1.19	0.2018	0.8359	Sema3f
Slc6a9	6.3	6.05	1.19	0.0161	0.8359	Slc6a9
Deaf1	6.47	6.22	1.19	0.1006	0.8359	Deaf1
Pdhx	3.31	3.07	1.19	0.2161	0.8359	Pdhx
Gng7	4.29	4.04	1.19	0.2058	0.8359	Gng7
Kdsr	4.78	4.53	1.19	0.1881	0.8359	Kdsr
Litaf	7.17	6.92	1.19	0.0947	0.8359	Litaf
Gcfc2	2.81	2.56	1.19	0.913	1	Gcfc2
Dgkg	0.31	0.06	1.19	0.0063	0.8359	Dgkg
Tcf20	5.64	5.39	1.19	0.2001	0.8359	Tcf20
Nrxn2	11.77	11.52	1.19	0.1601	0.8359	Nrxn2
Rbbp9	6.71	6.47	1.19	0.1002	0.8359	Rbbp9
Cdc20	4.55	4.3	1.19	0.3088	0.8359	Cdc20
Psd2	6.52	6.27	1.19	0.4829	0.9035	Psd2
Atad3aos	0.3	0.05	1.19	0.4787	0.9011	Atad3aos
Mks1	4.13	3.88	1.19	0.4904	0.9102	Mks1
Gnl1	1.27	1.03	1.19	0.1605	0.8359	Gnl1
Arf5	5.25	5	1.19	0.1157	0.8359	Arf5
Rims2	5.25	5.01	1.19	0.2789	0.8359	Rims2
A230051N06Rik	1.5	1.26	1.19	0.1897	0.8359	A230051N06Rik
Atxn7l2	4.4	4.15	1.19	0.3931	0.8589	Atxn7l2
Lrrc75b	7.35	7.11	1.19	0.0362	0.8359	Lrrc75b
Fuca1	5.17	4.92	1.19	0.3066	0.8359	Fuca1
Uggt2	2.03	1.78	1.19	0.6376	1	Uggt2
Flywch2	0.94	0.69	1.19	0.6482	1	Flywch2
Ypel4	5.14	4.89	1.19	0.0714	0.8359	Ypel4
Man2a2	8.65	8.4	1.19	0.0807	0.8359	Man2a2
Mbp	12.88	12.63	1.19	0.0433	0.8359	Mbp
Rapgef3	3.79	3.54	1.19	0.4789	0.9011	Rapgef3
Gm1673	4.77	4.52	1.19	0.0571	0.8359	Gm1673
Abcb10	4.64	4.39	1.19	0.0191	0.8359	Abcb10
Esrrb	0.73	0.48	1.19	0.9413	1	Esrrb
Mboat1	0.79	0.55	1.19	0.2415	0.8359	Mboat1
Gm7173	0.72	0.48	1.19	0.3362	0.8589	Gm7173
Ccdc122	1.68	1.44	1.19	0.3448	0.8589	Ccdc122
Fut10	2.44	2.2	1.19	0.749	1	Fut10
Crtam	0.42	0.17	1.18	0.0665	0.8359	Crtam
Peo1	3.59	3.34	1.18	0.2165	0.8359	Peo1
Mgat1	0.43	0.19	1.18	0.9646	1	Mgat1
3110053B16Rik	0.66	0.42	1.18	0.4997	0.9174	3110053B16Rik
Ostm1	3.48	3.23	1.18	0.4096	0.8589	Ostm1
Tmem82	0.45	0.2	1.18	0.2437	0.8359	Tmem82
Spryd3	4.48	4.23	1.18	0.0614	0.8359	Spryd3
Mrpl21	0.72	0.48	1.18	0.565	0.9571	Mrpl21
Gm5084	0.49	0.25	1.18	0.1536	0.8359	Gm5084
Pef1	4.38	4.14	1.18	0.4846	0.905	Pef1
Nfix	10.03	9.79	1.18	0.1066	0.8359	Nfix
Gm4285	1.06	0.82	1.18	0.4487	0.8797	Gm4285
Gm26519	1.45	1.21	1.18	0.2229	0.8359	Gm26519
Inpp5j	1.57	1.33	1.18	0.1716	0.8359	Inpp5j
Prdm11	3.95	3.7	1.18	0.1102	0.8359	Prdm11
Smg9	5.34	5.09	1.18	0.0351	0.8359	Smg9
Katnb1	4.8	4.56	1.18	0.055	0.8359	Katnb1
Akap14	0.37	0.12	1.18	0.1992	0.8359	Akap14
Tmem214	5.9	5.66	1.18	0.1505	0.8359	Tmem214
Gjc2	2.15	1.9	1.18	0.711	1	Gjc2
Pnpla6	9.33	9.09	1.18	0.0755	0.8359	Pnpla6
Daglb	5.44	5.19	1.18	0.061	0.8359	Daglb
Acy3	0.63	0.39	1.18	0.6431	1	Acy3
U2af2	10.02	9.77	1.18	0.1065	0.8359	U2af2
Sidt2	5.43	5.19	1.18	0.075	0.8359	Sidt2
Olfr1010	0.26	0.02	1.18	0.2649	0.8359	Olfr1010
Orai3	2.73	2.49	1.18	0.6094	0.9845	Orai3
Gm16794	1.33	1.09	1.18	0.9145	1	Gm16794
Dlk2	4.72	4.47	1.18	0.1627	0.8359	Dlk2
Stk32b	8.99	8.75	1.18	0.2747	0.8359	Stk32b
9530051G07Rik	0.3	0.06	1.18	0.6665	1	9530051G07Rik
Golgb1	3.95	3.71	1.18	0.427	0.8642	Golgb1
Exosc7	0.91	0.66	1.18	0.956	1	Exosc7
Gm16023	0.31	0.07	1.18	0.4936	0.9127	Gm16023
Gapvd1	4.63	4.39	1.18	0.7092	1	Gapvd1
Cd109	0.59	0.34	1.18	0.3863	0.8589	Cd109
Nle1	4.76	4.51	1.18	0.1087	0.8359	Nle1
B4galnt4	7.84	7.6	1.18	0.0666	0.8359	B4galnt4
Gaa	5.5	5.26	1.18	0.2043	0.8359	Gaa
Dfna5	1.29	1.05	1.18	0.979	1	Dfna5
Patz1	7.79	7.55	1.18	0.0194	0.8359	Patz1
A430105I19Rik	0.3	0.06	1.18	0.1597	0.8359	A430105I19Rik
Gm31264	0.21	-0.03	1.18	0.0602	0.8359	Gm31264
Chst11	7.85	7.61	1.18	0.0683	0.8359	Chst11
Epb41l1	5.45	5.21	1.18	0.1521	0.8359	Epb41l1
D630003M21Rik	2.36	2.12	1.18	0.3933	0.8589	D630003M21Rik
4930526F13Rik	0.24	0	1.18	0.1163	0.8359	4930526F13Rik
LOC108168005	0.81	0.57	1.18	0.4827	0.9032	LOC108168005
Dnajc4	4.34	4.1	1.18	0.2917	0.8359	Dnajc4
Apba2	6.97	6.73	1.18	0.0634	0.8359	Apba2
Slc25a18	3.37	3.13	1.18	0.0499	0.8359	Slc25a18
Lrat	0.77	0.53	1.18	0.1561	0.8359	Lrat
Chmp2a	4.84	4.6	1.18	0.3583	0.8589	Chmp2a
Tada2b	2.52	2.28	1.18	0.509	0.9212	Tada2b
Mavs	6.91	6.67	1.18	0.0617	0.8359	Mavs
Rtn4r	1.24	1	1.18	0.4983	0.9162	Rtn4r
Rpp40	0.64	0.4	1.18	0.8871	1	Rpp40
Gm13420	0.44	0.2	1.18	0.3388	0.8589	Gm13420
Get4	6.43	6.19	1.18	0.4821	0.9029	Get4
Tmem55b	3.88	3.64	1.18	0.2664	0.8359	Tmem55b
Kcnh2	7.9	7.67	1.18	0.3747	0.8589	Kcnh2
Asb5	0.87	0.63	1.18	0.0281	0.8359	Asb5
St8sia3	1.42	1.18	1.18	0.8091	1	St8sia3
Rnf144a	6.64	6.41	1.18	0.15	0.8359	Rnf144a
Pacs1	7.16	6.92	1.18	0.1381	0.8359	Pacs1
Cnih2	4.32	4.08	1.18	0.1601	0.8359	Cnih2
Aldoc	6.29	6.05	1.18	0.1279	0.8359	Aldoc
Gm3325	1.86	1.62	1.18	0.7533	1	Gm3325
Arhgef15	0.47	0.23	1.18	0.3868	0.8589	Arhgef15
Zfp212	6.01	5.78	1.18	0.1433	0.8359	Zfp212
Abca2	8.13	7.89	1.18	0.1844	0.8359	Abca2
Gm20684	0.44	0.2	1.18	0.1439	0.8359	Gm20684
A630072M18Rik	1.44	1.2	1.18	0.5651	0.9572	A630072M18Rik
Yy1	3.36	3.13	1.18	0.5067	0.9204	Yy1
Gm31115	0.35	0.11	1.18	0.3477	0.8589	Gm31115
Ccin	0.83	0.59	1.18	0.2894	0.8359	Ccin
Ppp5c	5.4	5.16	1.18	0.1054	0.8359	Ppp5c
Mfng	2.31	2.07	1.18	0.1495	0.8359	Mfng
Spock2	7.32	7.08	1.18	0.0074	0.8359	Spock2
Wdr11	6.38	6.14	1.18	0.0554	0.8359	Wdr11
Sh3glb2	7.84	7.6	1.18	0.0617	0.8359	Sh3glb2
Adal	1.02	0.78	1.18	0.4999	0.9174	Adal
Cntrob	4.99	4.75	1.18	0.3086	0.8359	Cntrob
Serpinf1	1.77	1.53	1.18	0.6855	1	Serpinf1
Chst1	0.68	0.44	1.18	0.8114	1	Chst1
Eqtn	0.29	0.05	1.18	0.2515	0.8359	Eqtn
Lmtk3	9.89	9.66	1.18	0.1714	0.8359	Lmtk3
Pinx1	1.08	0.84	1.18	0.667	1	Pinx1
Alg12	3.01	2.78	1.18	0.0493	0.8359	Alg12
Eefsec	3.91	3.68	1.18	0.4098	0.8589	Eefsec
Gm15706	1.74	1.5	1.18	0.1952	0.8359	Gm15706
9430091E24Rik	1.02	0.78	1.18	0.3961	0.8589	9430091E24Rik
Slx1b	4.68	4.44	1.18	0.084	0.8359	Slx1b
Faap20	4.51	4.27	1.18	0.6359	0.9985	Faap20
Klhl34	4.92	4.69	1.18	0.1238	0.8359	Klhl34
Pxylp1	7.35	7.11	1.18	0.4357	0.8687	Pxylp1
Zcchc12	2.69	2.45	1.18	0.4279	0.8645	Zcchc12
Nectin2	5.13	4.89	1.18	0.0163	0.8359	Nectin2
Rfx4	2.42	2.19	1.18	0.1984	0.8359	Rfx4
Pi4ka	7.67	7.43	1.18	0.0755	0.8359	Pi4ka
Gm5860	0.27	0.04	1.18	0.2544	0.8359	Gm5860
Coch	0.26	0.02	1.18	0.2016	0.8359	Coch
Smoc2	0.26	0.02	1.18	0.2016	0.8359	Smoc2
Kif19a	2.94	2.71	1.18	0.2501	0.8359	Kif19a
Atad3a	6.21	5.98	1.18	0.1894	0.8359	Atad3a
Rnf135	0.8	0.57	1.18	0.0845	0.8359	Rnf135
Atp13a1	7.36	7.12	1.18	0.1104	0.8359	Atp13a1
Fbrsl1	7.02	6.79	1.18	0.1915	0.8359	Fbrsl1
Hist1h2ba	0.26	0.02	1.18	0.1666	0.8359	Hist1h2ba
Rab11fip5	4.87	4.64	1.18	0.1277	0.8359	Rab11fip5
Gm10658	0.55	0.31	1.18	0.4249	0.8619	Gm10658
Svbp	4.5	4.27	1.18	0.0766	0.8359	Svbp
Nr1d2	3.16	2.92	1.18	0.6429	1	Nr1d2
B3gat2	7.35	7.12	1.18	0.3628	0.8589	B3gat2
Aoc1	0.21	-0.03	1.18	0.2188	0.8359	Aoc1
Sod1	8.07	7.84	1.18	0.1706	0.8359	Sod1
Pemt	1.55	1.31	1.18	0.7115	1	Pemt
Ndrg2	6.94	6.7	1.18	0.0741	0.8359	Ndrg2
2210406O10Rik	1.1	0.86	1.18	0.804	1	2210406O10Rik
Slc26a10	0.45	0.21	1.18	0.988	1	Slc26a10
Gcat	5.54	5.3	1.18	0.0904	0.8359	Gcat
Usp11	5.86	5.63	1.18	0.0231	0.8359	Usp11
Raf1	6.37	6.14	1.18	0.2885	0.8359	Raf1
LOC108168069	2.37	2.14	1.18	0.3906	0.8589	LOC108168069
4933411K16Rik	0.51	0.27	1.18	0.4163	0.8589	4933411K16Rik
Ephb2	7.08	6.85	1.18	0.0145	0.8359	Ephb2
Plxdc1	0.75	0.52	1.18	0.2515	0.8359	Plxdc1
Nkiras2	5.45	5.21	1.18	0.1831	0.8359	Nkiras2
Rgma	3.64	3.41	1.18	0.241	0.8359	Rgma
Fam91a1	1.71	1.47	1.18	0.9857	1	Fam91a1
Bin3	2.95	2.72	1.18	0.1401	0.8359	Bin3
Rad18	0.64	0.4	1.18	0.63	0.9952	Rad18
Xpc	2.33	2.09	1.18	0.353	0.8589	Xpc
Nkx6-2	0.95	0.72	1.18	0.1549	0.8359	Nkx6-2
Anks1	7.47	7.24	1.18	0.0603	0.8359	Anks1
Cd28	0.23	-0.01	1.18	0.1919	0.8359	Cd28
Cisd3	2.66	2.43	1.18	0.2992	0.8359	Cisd3
Nucb1	8.88	8.65	1.18	0.0249	0.8359	Nucb1
Cecr2	3.51	3.27	1.18	0.2209	0.8359	Cecr2
Manbal	5.52	5.29	1.18	0.0037	0.8359	Manbal
Leng8	8.27	8.03	1.18	0.0641	0.8359	Leng8
Prr18	4.04	3.81	1.18	0.2666	0.8359	Prr18
Lypd1	1.1	0.87	1.18	0.6119	0.9857	Lypd1
Ostn	0.79	0.55	1.18	0.1006	0.8359	Ostn
Pex14	5.94	5.71	1.18	0.17	0.8359	Pex14
Zkscan17	7.28	7.05	1.18	0.0593	0.8359	Zkscan17
Btbd6	6.24	6.01	1.18	0.0206	0.8359	Btbd6
Tctn3	4.56	4.32	1.18	0.1584	0.8359	Tctn3
Gm8674	0.34	0.1	1.18	0.0192	0.8359	Gm8674
Chpf2	6.34	6.11	1.18	0.1772	0.8359	Chpf2
Capn10	4.09	3.86	1.18	0.1132	0.8359	Capn10
Dbndd1	7.15	6.91	1.17	0.1253	0.8359	Dbndd1
Paqr3	1.16	0.93	1.17	0.3173	0.8417	Paqr3
Man2a1	2.29	2.06	1.17	0.6076	0.9843	Man2a1
Tnfrsf10b	2.73	2.5	1.17	0.407	0.8589	Tnfrsf10b
Reck	3.89	3.66	1.17	0.1813	0.8359	Reck
Thbs3	3.44	3.2	1.17	0.4683	0.8938	Thbs3
Agtrap	5.45	5.21	1.17	0.8563	1	Agtrap
Tceal3	3.65	3.42	1.17	0.4888	0.9086	Tceal3
Nova2	6.88	6.65	1.17	0.0509	0.8359	Nova2
G730013B05Rik	0.23	0	1.17	0.1229	0.8359	G730013B05Rik
Pdlim7	5.5	5.27	1.17	0.1101	0.8359	Pdlim7
Gpd2	0.61	0.38	1.17	0.5988	0.9796	Gpd2
Brms1	5.51	5.28	1.17	0.1098	0.8359	Brms1
Vav2	7.87	7.64	1.17	0.1227	0.8359	Vav2
Gtpbp1	6.7	6.47	1.17	0.1963	0.8359	Gtpbp1
Chga	5.16	4.93	1.17	0.0039	0.8359	Chga
C4b	0.29	0.05	1.17	0.2381	0.8359	C4b
Pkhd1l1	1.04	0.81	1.17	0.4197	0.8589	Pkhd1l1
Kcnb1	7.34	7.11	1.17	0.1915	0.8359	Kcnb1
Mael	0.32	0.09	1.17	0.8363	1	Mael
Fam160a1	0.71	0.47	1.17	0.4512	0.8816	Fam160a1
Nudt3	5.86	5.63	1.17	0.2185	0.8359	Nudt3
Wwp2	5.19	4.96	1.17	0.0442	0.8359	Wwp2
Zfp930	3.25	3.02	1.17	0.031	0.8359	Zfp930
Ccdc88c	7.41	7.18	1.17	0.0375	0.8359	Ccdc88c
Actl10	0.29	0.06	1.17	0.3036	0.8359	Actl10
Fam20b	2.76	2.53	1.17	0.8313	1	Fam20b
Higd2a	4.53	4.3	1.17	0.4022	0.8589	Higd2a
Wipi1	5.87	5.64	1.17	0.2529	0.8359	Wipi1
Map7d2	3.84	3.61	1.17	0.5135	0.9239	Map7d2
Wdfy3	9.09	8.86	1.17	0.075	0.8359	Wdfy3
Lzts1	3.79	3.56	1.17	0.1174	0.8359	Lzts1
Klf12	6.47	6.24	1.17	0.1612	0.8359	Klf12
Sarm1	5.38	5.15	1.17	0.1528	0.8359	Sarm1
Eral1	5.12	4.89	1.17	0.6227	0.9904	Eral1
Rgp1	4.26	4.03	1.17	0.2909	0.8359	Rgp1
Oxa1l	5.13	4.9	1.17	0.3269	0.8512	Oxa1l
Abhd6	3.24	3.01	1.17	0.4388	0.8716	Abhd6
Klhl30	0.97	0.74	1.17	0.7943	1	Klhl30
Map3k11	3.76	3.53	1.17	0.1666	0.8359	Map3k11
Gtse1	2.69	2.46	1.17	0.3644	0.8589	Gtse1
Arhgap27	1.28	1.05	1.17	0.6313	0.9958	Arhgap27
Slc9a3r2	4.41	4.18	1.17	0.1855	0.8359	Slc9a3r2
St5	4.88	4.65	1.17	0.2699	0.8359	St5
A730089K16Rik	1.34	1.11	1.17	0.8106	1	A730089K16Rik
Hrasls	0.25	0.02	1.17	0.2381	0.8359	Hrasls
Tshz3	5.01	4.78	1.17	0.0182	0.8359	Tshz3
Zfp579	6.53	6.3	1.17	0.413	0.8589	Zfp579
A1bg	0.28	0.05	1.17	0.0745	0.8359	A1bg
Mrpl11	3.12	2.89	1.17	0.7866	1	Mrpl11
Ubap1l	0.78	0.55	1.17	0.2052	0.8359	Ubap1l
Gpd1l	7.66	7.43	1.17	0.1826	0.8359	Gpd1l
Sdk2	7.24	7.01	1.17	0.1767	0.8359	Sdk2
Cox7b	5.13	4.9	1.17	0.7428	1	Cox7b
Natd1	7.89	7.67	1.17	0.2366	0.8359	Natd1
Adamts14	1.85	1.63	1.17	0.5104	0.922	Adamts14
4933427D14Rik	5.24	5.01	1.17	0.2615	0.8359	4933427D14Rik
Flnc	1.93	1.71	1.17	0.2055	0.8359	Flnc
Gnaz	5.58	5.35	1.17	0.2431	0.8359	Gnaz
[truncated: 21,931 more rows]

## Sheet: UPREGULATED n=57
ID	EDA Avg (log2)	DMSO Avg (log2)	Fold Change	P-val	FDR P-val	Gene Symbol
Ahrr	2.83	1.06	3.4	0.0044	0.8359	Ahrr
Plec	7.28	6.27	2.01	0.0011	0.8359	Plec
LOC108167784	2.35	1.39	1.96	0.035	0.8359	LOC108167784
Plekha4	1.89	0.96	1.91	0.0202	0.8359	Plekha4
Slc39a3	4.17	3.33	1.8	0.0466	0.8359	Slc39a3
Fhit	1.58	0.77	1.76	0.0167	0.8359	Fhit
Klf9	2.66	1.85	1.75	0.04	0.8359	Klf9
Zfp395	2.08	1.27	1.75	0.0419	0.8359	Zfp395
Crtac1	3.67	2.91	1.7	0.0168	0.8359	Crtac1
Ssbp2	1.69	0.94	1.68	0.035	0.8359	Ssbp2
Jmjd4	2.47	1.75	1.64	0.0431	0.8359	Jmjd4
Dlec1	1.65	0.95	1.63	0.0426	0.8359	Dlec1
Catsperd	0.72	0.02	1.63	0.0233	0.8359	Catsperd
Olfml2a	1.16	0.46	1.62	0.0099	0.8359	Olfml2a
Pink1	5.51	4.81	1.62	0.0414	0.8359	Pink1
Cyp1b1	4.22	3.53	1.62	0.028	0.8359	Cyp1b1
Wnt7b	1.01	0.31	1.62	0.0187	0.8359	Wnt7b
Hhatl	1.09	0.4	1.62	0.0423	0.8359	Hhatl
Kremen1	2.76	2.07	1.61	0.0124	0.8359	Kremen1
Gnmt	1.29	0.63	1.58	0.0023	0.8359	Gnmt
Xrcc6bp1	1.96	1.3	1.58	0.0076	0.8359	Xrcc6bp1
Rilpl2	3.05	2.4	1.57	0.0431	0.8359	Rilpl2
Klhl3	3.5	2.85	1.57	0.0048	0.8359	Klhl3
Susd3	0.88	0.24	1.56	0.0123	0.8359	Susd3
Dnmbp	2.96	2.32	1.56	0.0211	0.8359	Dnmbp
Rnf126	2.9	2.26	1.55	0.0168	0.8359	Rnf126
Trim11	3.54	2.9	1.55	0.0311	0.8359	Trim11
Fam210b	2.94	2.31	1.55	0.0122	0.8359	Fam210b
Trim62	6.67	6.05	1.54	0.0241	0.8359	Trim62
Ccsap	2.04	1.41	1.54	0.0103	0.8359	Ccsap
Arhgef4	4.97	4.35	1.53	0.0242	0.8359	Arhgef4
Apcdd1	6.75	6.14	1.53	0.0251	0.8359	Apcdd1
Nhs	4.06	3.45	1.53	0.0371	0.8359	Nhs
Zmynd15	1.7	1.1	1.52	0.0177	0.8359	Zmynd15
Rassf4	3.3	2.69	1.52	0.0095	0.8359	Rassf4
Flot1	4.35	3.75	1.52	0.0294	0.8359	Flot1
4933412E12Rik	1.33	0.73	1.52	0.0367	0.8359	4933412E12Rik
Rasl10b	7.39	6.78	1.52	0.0399	0.8359	Rasl10b
Ankrd24	3.54	2.95	1.51	0.003	0.8359	Ankrd24
B4galnt1	4.87	4.28	1.5	0.0132	0.8359	B4galnt1
Foxo4	6.21	5.63	1.5	0.0162	0.8359	Foxo4
Stxbp5l	1.13	0.55	1.5	0.0092	0.8359	Stxbp5l
Onecut2	1.31	0.73	1.5	0.0074	0.8359	Onecut2
Crocc	5.89	5.31	1.49	0.0367	0.8359	Crocc
Cyp1a1	0.59	0.02	1.49	0.0009	0.8359	Cyp1a1
Ube2e1	2.81	2.24	1.48	0.0345	0.8359	Ube2e1
Irgq	8.5	7.93	1.48	0.0078	0.8359	Irgq
Znhit1	6.23	5.66	1.48	0.0237	0.8359	Znhit1
Obox6	0.86	0.3	1.48	0.0098	0.8359	Obox6
Sdr42e1	0.79	0.23	1.47	0.0148	0.8359	Sdr42e1
Ankrd39	3.74	3.18	1.47	0.0344	0.8359	Ankrd39
Gprin2	2.69	2.14	1.47	0.0119	0.8359	Gprin2
Syne4	2.35	1.8	1.46	0.0391	0.8359	Syne4
Rpp25	2.31	1.76	1.46	0.0384	0.8359	Rpp25
Zfp28	3.81	3.27	1.46	0.0264	0.8359	Zfp28
Hpcal4	1.05	0.51	1.45	0.0295	0.8359	Hpcal4
Atoh8	4.92	4.38	1.45	0.0102	0.8359	Atoh8

## Sheet: DOWNREGULATED n=192
ID	EDA Avg (log2)	DMSO Avg (log2)	Fold Change	P-val	FDR P-val	Gene Symbol
Ttr	4.43	6.37	-3.86	0.0324	0.8359	Ttr
Gm38398	3.16	4.64	-2.79	0.0441	0.8359	Gm38398
Ddx1	1.49	2.79	-2.46	0.0001	0.7562	Ddx1
Lrp6	2.6	3.8	-2.3	0.0401	0.8359	Lrp6
Mansc1	0.16	1.36	-2.29	0.0166	0.8359	Mansc1
Gm6607	0.17	1.36	-2.28	0.0013	0.8359	Gm6607
Adig	2.87	4.03	-2.23	0.0235	0.8359	Adig
Cct8	2.59	3.74	-2.22	0.0105	0.8359	Cct8
Gm6578	1.95	3.1	-2.22	0.0233	0.8359	Gm6578
Slc4a5	0.6	1.68	-2.11	0.0267	0.8359	Slc4a5
Akr1c21	2.42	3.46	-2.05	0.0132	0.8359	Akr1c21
Gm30684	2.84	3.84	-2.01	0.0235	0.8359	Gm30684
4732471J01Rik	1.18	2.19	-2	0.0237	0.8359	4732471J01Rik
Gm33777	2.32	3.31	-1.99	0.007	0.8359	Gm33777
Smc2os	2.55	3.54	-1.99	0.0104	0.8359	Smc2os
Gm32172	1.95	2.93	-1.98	0.0389	0.8359	Gm32172
Plk4	2.57	3.54	-1.96	0.0436	0.8359	Plk4
Tmem258	1.89	2.86	-1.96	0.0013	0.8359	Tmem258
Mroh2b	1.04	2	-1.94	0.0496	0.8359	Mroh2b
0610010F05Rik	1.29	2.25	-1.94	0.0197	0.8359	0610010F05Rik
Clic6	0.64	1.58	-1.92	0.0211	0.8359	Clic6
6330415B21Rik	0.35	1.29	-1.92	0.0348	0.8359	6330415B21Rik
Zdhhc21	2.4	3.34	-1.91	0.0231	0.8359	Zdhhc21
Dbf4	0.32	1.24	-1.89	0.0041	0.8359	Dbf4
Gm11992	2.95	3.86	-1.88	0.0362	0.8359	Gm11992
BE949265	2.02	2.93	-1.88	0.0236	0.8359	BE949265
Tmem69	0.44	1.35	-1.87	0.0176	0.8359	Tmem69
Ncl	4.39	5.29	-1.87	0.0212	0.8359	Ncl
4930518P08Rik	0.56	1.45	-1.85	0.0411	0.8359	4930518P08Rik
Mccc2	1.88	2.76	-1.85	0.0408	0.8359	Mccc2
AY761185	0.63	1.51	-1.84	0.0122	0.8359	AY761185
Spata25	1.1	1.96	-1.82	0.0175	0.8359	Spata25
Tsc22d1	0.82	1.68	-1.81	0.0267	0.8359	Tsc22d1
Tspo	0.86	1.71	-1.81	0.0239	0.8359	Tspo
Zfp606	1.14	1.98	-1.79	0.0177	0.8359	Zfp606
Gm9839	0.43	1.27	-1.78	0.0188	0.8359	Gm9839
LOC108167680	0.2	1.04	-1.78	0.0178	0.8359	LOC108167680
1700116H05Rik	0.16	0.99	-1.78	0.0203	0.8359	1700116H05Rik
Zbtb8os	2.36	3.19	-1.78	0.0453	0.8359	Zbtb8os
1810034E14Rik	6.24	7.07	-1.78	0.0116	0.8359	1810034E14Rik
LOC108167873	0.52	1.35	-1.77	0.0298	0.8359	LOC108167873
Dnpep	7.68	8.51	-1.77	0.0377	0.8359	Dnpep
Vprbp	2.81	3.62	-1.76	0.0279	0.8359	Vprbp
Tuba3b	1.65	2.46	-1.76	0.0391	0.8359	Tuba3b
Ubqln2	0.91	1.72	-1.76	0.0202	0.8359	Ubqln2
Phxr4	3.34	4.15	-1.75	0.0076	0.8359	Phxr4
Samhd1	1.68	2.49	-1.75	0.0433	0.8359	Samhd1
Hist1h4h	1.88	2.69	-1.75	0.0264	0.8359	Hist1h4h
Olfr1393	0.53	1.33	-1.74	0.0414	0.8359	Olfr1393
Rhpn2	0.26	1.05	-1.74	0.0448	0.8359	Rhpn2
Helq	0.22	1.01	-1.73	0.0315	0.8359	Helq
Eif2s3y	2.8	3.59	-1.73	0.0387	0.8359	Eif2s3y
St3gal6	0.76	1.55	-1.73	0.0046	0.8359	St3gal6
Gm6225	0.79	1.57	-1.72	0.0205	0.8359	Gm6225
Chordc1	1.84	2.61	-1.72	0.0416	0.8359	Chordc1
Ticrr	3.79	4.57	-1.71	0.0217	0.8359	Ticrr
Tm6sf1	2.17	2.95	-1.71	0.0176	0.8359	Tm6sf1
Ak6	0.78	1.55	-1.71	0.0174	0.8359	Ak6
Etaa1	1.71	2.47	-1.7	0.0342	0.8359	Etaa1
Lmbrd1	1.35	2.12	-1.7	0.0236	0.8359	Lmbrd1
1500015O10Rik	3.52	4.28	-1.7	0.034	0.8359	1500015O10Rik
2310009B15Rik	1.52	2.28	-1.7	0.0109	0.8359	2310009B15Rik
Gm21269	0.83	1.59	-1.69	0.0188	0.8359	Gm21269
Aptx	2.19	2.94	-1.69	0.0149	0.8359	Aptx
Adgre4	1.1	1.86	-1.69	0.0369	0.8359	Adgre4
Trmt13	2.99	3.74	-1.68	0.0168	0.8359	Trmt13
Trpm7	3.47	4.22	-1.68	0.0344	0.8359	Trpm7
Dtl	4.39	5.14	-1.68	0.0005	0.8029	Dtl
4930577N17Rik	0.33	1.08	-1.68	0.0053	0.8359	4930577N17Rik
Zfp51	2.56	3.3	-1.67	0.0156	0.8359	Zfp51
A830052D11Rik	1.04	1.78	-1.67	0.0188	0.8359	A830052D11Rik
Dock4	2.15	2.89	-1.67	0.0414	0.8359	Dock4
Gm3519	0.68	1.42	-1.67	0.0089	0.8359	Gm3519
Snrnp48	1.08	1.81	-1.66	0.0295	0.8359	Snrnp48
LOC105242579	1.46	2.18	-1.66	0.0162	0.8359	LOC105242579
Ppp2r3a	1.69	2.42	-1.66	0.0178	0.8359	Ppp2r3a
Acaca	2.53	3.26	-1.65	0.0343	0.8359	Acaca
Smc2	2.36	3.09	-1.65	0.0446	0.8359	Smc2
Bves	0.88	1.6	-1.64	0.026	0.8359	Bves
Gm14725	0.95	1.67	-1.64	0.0311	0.8359	Gm14725
Rnls	2.45	3.17	-1.64	0.0207	0.8359	Rnls
Sycp1	2.28	2.99	-1.64	0.0279	0.8359	Sycp1
Slc23a1	0.21	0.93	-1.64	0.0466	0.8359	Slc23a1
Hmgn3	2.45	3.16	-1.64	0.0173	0.8359	Hmgn3
LOC108168254	0.58	1.29	-1.63	0.0081	0.8359	LOC108168254
Slc39a10	2.91	3.62	-1.63	0.0426	0.8359	Slc39a10
Wapl	4.18	4.88	-1.63	0.0082	0.8359	Wapl
4933423P22Rik	0.12	0.83	-1.63	0.0019	0.8359	4933423P22Rik
Oscar	0.64	1.34	-1.63	0.0247	0.8359	Oscar
Prkar2b	1.28	1.99	-1.63	0.0078	0.8359	Prkar2b
Arl1	4.48	5.18	-1.63	0.0333	0.8359	Arl1
Atp2b3	2.14	2.84	-1.62	0.0252	0.8359	Atp2b3
Palmd	0.24	0.93	-1.61	0.0496	0.8359	Palmd
Mad2l1	3.82	4.51	-1.61	0.0152	0.8359	Mad2l1
Fgf9	0.51	1.19	-1.61	0.0286	0.8359	Fgf9
Hmcn2	0.24	0.93	-1.61	0.0411	0.8359	Hmcn2
1700001J11Rik	0.05	0.74	-1.61	0.0137	0.8359	1700001J11Rik
Gtf3a	2.26	2.94	-1.61	0.0316	0.8359	Gtf3a
Gm5089	0.43	1.11	-1.6	0.0393	0.8359	Gm5089
Gm16523	2.34	3.02	-1.6	0.0428	0.8359	Gm16523
2810001G20Rik	0.78	1.46	-1.6	0.0388	0.8359	2810001G20Rik
Gpcpd1	3.86	4.53	-1.6	0.0469	0.8359	Gpcpd1
Olfr117	0.85	1.53	-1.6	0.025	0.8359	Olfr117
Rtkn2	0.7	1.38	-1.6	0.0439	0.8359	Rtkn2
Thoc2	4.15	4.83	-1.6	0.0307	0.8359	Thoc2
1700034I23Rik	1.25	1.92	-1.6	0.0322	0.8359	1700034I23Rik
Prss48	0.51	1.19	-1.59	0.0124	0.8359	Prss48
Foxd4	0.35	1.03	-1.59	0.028	0.8359	Foxd4
Pla2g7	0.62	1.29	-1.59	0.007	0.8359	Pla2g7
Napepld	2.68	3.35	-1.59	0.0361	0.8359	Napepld
Wfdc5	0.01	0.67	-1.58	0.0108	0.8359	Wfdc5
Asns	2.32	2.98	-1.58	0.0421	0.8359	Asns
Prdx4	1.58	2.23	-1.58	0.0352	0.8359	Prdx4
Rgag4	0.22	0.87	-1.57	0.0049	0.8359	Rgag4
Epor	0.33	0.98	-1.57	0.0321	0.8359	Epor
Plag1	0.24	0.89	-1.57	0.0262	0.8359	Plag1
Zbed3	1.32	1.96	-1.56	0.017	0.8359	Zbed3
Cc2d2a	1.29	1.93	-1.56	0.0216	0.8359	Cc2d2a
Fer1l5	0.39	1.03	-1.55	0.0196	0.8359	Fer1l5
Fam103a1	2.13	2.76	-1.55	0.0098	0.8359	Fam103a1
Msh3	1.85	2.48	-1.55	0.0325	0.8359	Msh3
Rhot1	4.07	4.69	-1.54	0.0201	0.8359	Rhot1
2410017I17Rik	0.43	1.05	-1.54	0.0358	0.8359	2410017I17Rik
Vdac1	5.76	6.38	-1.54	0.0353	0.8359	Vdac1
Slc25a20	2.13	2.76	-1.54	0.0424	0.8359	Slc25a20
Eif4g2	8.27	8.9	-1.54	0.0317	0.8359	Eif4g2
Gm3086	0.08	0.7	-1.54	0.044	0.8359	Gm3086
Hist1h2ab	2.87	3.49	-1.54	0.0014	0.8359	Hist1h2ab
Hcn1	0.68	1.3	-1.54	0.0325	0.8359	Hcn1
Eif4e	8.29	8.91	-1.54	0.0294	0.8359	Eif4e
Smek2	0.28	0.9	-1.54	0.0087	0.8359	Smek2
Acin1	3.02	3.64	-1.53	0.0234	0.8359	Acin1
Fam135b	2.77	3.38	-1.53	0.0138	0.8359	Fam135b
Ptbp3	3.28	3.9	-1.53	0.0026	0.8359	Ptbp3
Lef1	-0.01	0.61	-1.53	0.0098	0.8359	Lef1
Ndufb5	3.75	4.36	-1.52	0.0096	0.8359	Ndufb5
Htr2c	0.67	1.27	-1.52	0.0377	0.8359	Htr2c
Cnbp	7.17	7.77	-1.51	0.024	0.8359	Cnbp
Drd2	3.65	4.24	-1.51	0.0048	0.8359	Drd2
1110059E24Rik	0.64	1.23	-1.51	0.0264	0.8359	1110059E24Rik
Nt5c	3.58	4.17	-1.51	0.0088	0.8359	Nt5c
Erbb3	0.7	1.29	-1.51	0.0092	0.8359	Erbb3
Gm36037	0.19	0.78	-1.5	0.0419	0.8359	Gm36037
Tgs1	0.48	1.07	-1.5	0.0068	0.8359	Tgs1
Capza2	8.35	8.93	-1.5	0.0257	0.8359	Capza2
Tctex1d4	0.08	0.67	-1.5	0.0189	0.8359	Tctex1d4
Hspa1b	0.3	0.88	-1.5	0.0381	0.8359	Hspa1b
Pabpc2	0.18	0.76	-1.5	0.0112	0.8359	Pabpc2
M6pr	2.16	2.74	-1.5	0.0398	0.8359	M6pr
Psmg2	1.94	2.52	-1.5	0.0149	0.8359	Psmg2
2810417H13Rik	3.36	3.94	-1.5	0.0076	0.8359	2810417H13Rik
LOC108167432	0.78	1.36	-1.5	0.0367	0.8359	LOC108167432
Haus1	0.4	0.98	-1.49	0.0055	0.8359	Haus1
Ezh2	2.69	3.27	-1.49	0.0013	0.8359	Ezh2
Zfp654	0.39	0.97	-1.49	0.0121	0.8359	Zfp654
Phtf1	2.96	3.54	-1.49	0.0428	0.8359	Phtf1
2810474O19Rik	3.29	3.86	-1.49	0.0483	0.8359	2810474O19Rik
Slc25a16	3.18	3.76	-1.49	0.029	0.8359	Slc25a16
Brinp3	4.77	5.34	-1.49	0.0196	0.8359	Brinp3
Has1	0.09	0.67	-1.49	0.0467	0.8359	Has1
Atp6v1h	2.79	3.37	-1.49	0.0119	0.8359	Atp6v1h
Vsig10	2.66	3.23	-1.49	0.0431	0.8359	Vsig10
Zfp330	3	3.57	-1.48	0.0485	0.8359	Zfp330
Chml	2.89	3.46	-1.48	0.0131	0.8359	Chml
Mkrn1	3.23	3.8	-1.48	0.0497	0.8359	Mkrn1
Vamp5	0.21	0.77	-1.48	0.0142	0.8359	Vamp5
Timp4	2.4	2.97	-1.48	0.0313	0.8359	Timp4
Ufd1l	3.98	4.55	-1.48	0.0037	0.8359	Ufd1l
4932416H05Rik	2.08	2.65	-1.48	0.0068	0.8359	4932416H05Rik
Gm3902	0.29	0.86	-1.48	0.0221	0.8359	Gm3902
Gm10532	0.31	0.87	-1.48	0.0176	0.8359	Gm10532
Golga5	3.8	4.36	-1.48	0.0013	0.8359	Golga5
Eif1ax	5.71	6.27	-1.47	0.0281	0.8359	Eif1ax
Smurf2	4.72	5.28	-1.47	0.0486	0.8359	Smurf2
Nudt5	2.73	3.29	-1.47	0.016	0.8359	Nudt5
Cebpe	0.12	0.67	-1.47	0.0278	0.8359	Cebpe
Ptgs1	0.45	1	-1.47	0.0257	0.8359	Ptgs1
Slirp	2.05	2.6	-1.47	0.0478	0.8359	Slirp
Calr	1.54	2.09	-1.47	0.0351	0.8359	Calr
Usp1	0.23	0.78	-1.46	0.0435	0.8359	Usp1
Senp3	3.45	4	-1.46	0.002	0.8359	Senp3
Cdca8	4.56	5.11	-1.46	0.0108	0.8359	Cdca8
Gm29907	5.49	6.04	-1.46	0.014	0.8359	Gm29907
Bambi	2.06	2.6	-1.46	0.0072	0.8359	Bambi
Spag5	2.62	3.17	-1.46	0.0358	0.8359	Spag5
Impact	5.7	6.24	-1.46	0.0399	0.8359	Impact
B230119M05Rik	1.89	2.43	-1.46	0.0354	0.8359	B230119M05Rik
Mrps15	2.7	3.25	-1.46	0.0174	0.8359	Mrps15
Thbs2	1.73	2.27	-1.46	0.049	0.8359	Thbs2
Hacd2	2.92	3.46	-1.46	0.0151	0.8359	Hacd2
Ptk2	6.05	6.59	-1.45	0.0103	0.8359	Ptk2
Zfp326	3.72	4.26	-1.45	0.049	0.8359	Zfp326
